1 **Use of signals of positive and negative selection to distinguish cancer**  
2 **genes and passenger genes**

3

4

5 László Bányai<sup>1</sup>, Mária Trexler<sup>1</sup>, Krisztina Kerekes<sup>1</sup>, Orsolya Csuka<sup>2</sup> & László Patthy\*<sup>1</sup>

6

7 <sup>1</sup>Institute of Enzymology, Research Centre for Natural Sciences, Budapest, Hungary

8 <sup>2</sup>Department of Pathogenetics, National Institute of Oncology, Budapest, Hungary.

9

10 [banyai.laszlo@ttk.mta.hu](mailto:banyai.laszlo@ttk.mta.hu)

11 [csuka@oncol.hu](mailto:csuka@oncol.hu)

12 [kerekes.krisztina@ttk.mta.hu](mailto:kerekes.krisztina@ttk.mta.hu)

13 [patthy.laszlo@ttk.mta.hu](mailto:patthy.laszlo@ttk.mta.hu)

14 [trexler.maria@ttk.mta.hu](mailto:trexler.maria@ttk.mta.hu)

15

16 \* Correspondence: [patthy.laszlo@ttk.mta.hu](mailto:patthy.laszlo@ttk.mta.hu); Tel.: +36-1382-6751

17

18

19

20

21

## 22 **Abstract**

### 23 **Background**

24 A major goal of cancer genomics is to identify all genes that play critical roles in carcinogenesis.  
25 Most of the approaches aimed to achieve this goal focused on genes that are positively selected  
26 for mutations that drive carcinogenesis and neglected the role of negative selection. Some studies  
27 have actually concluded that negative selection has no role in cancer evolution.

### 28 **Results**

29 We have re-examined the role of negative selection in tumor evolution through the analysis of  
30 the patterns of somatic mutations affecting the coding sequences of human protein-coding genes.  
31 Our analyses have confirmed that the vast majority of human genes do not show detectable  
32 signals of selection, whereas tumor suppressor genes are positively selected for inactivating  
33 mutations. Oncogenes, however, were found to display signals of both negative selection for  
34 inactivating mutations and positive selection for activating mutations. Significantly, we have  
35 identified numerous human genes that show signs of strong negative selection during tumor  
36 evolution, suggesting that their functional integrity is essential for the growth and survival of  
37 tumor cells. It is worthy of note that the group of negatively selected genes includes several  
38 genes that play a central role in the Warburg effect characteristic of cancer cells as well as genes  
39 involved in the proliferation, immortalization, invasion and metastasis of tumor cells.

40

### 41 **Conclusions**

42 Our analyses suggest that the approach reported here will promote the identification of  
43 numerous novel tumor suppressor genes, oncogenes and pro-oncogenic genes that may serve as  
44 targets in cancer therapy.

45

46 **Keywords:** cancer gene; negative selection; positive selection; passenger gene; neutral  
47 evolution;

48

49

## 50 **Background**

### 51 **Genetic, epigenetic, transcriptomic and proteomic changes driving** 52 **carcinogenesis**

53 In the last two decades the rapid advance in genomics, epigenomics, transcriptomics and  
54 proteomics permitted an insight into the molecular basis of carcinogenesis. These studies have  
55 confirmed that tumors evolve from normal tissues by acquiring a series of genetic, epigenetic,  
56 transcriptomic and proteomic changes with concomitant alterations in the control of the  
57 proliferation, survival and spread of affected cells.

58 The genes that play key roles in carcinogenesis, referred to as cancer genes or cancer  
59 driver genes are usually assigned to two major categories: proto-oncogenes that have the  
60 potential to promote carcinogenesis when activated or overexpressed and tumor suppressor genes  
61 that promote carcinogenesis when inactivated or repressed.

62 There are several alternative mechanisms that can modify the structure or expression of a  
63 cancer gene in a way that promotes carcinogenesis. These include subtle genetic changes (single  
64 nucleotide substitutions, short indels), major genetic events (deletion, amplification,  
65 translocation and fusion of genes to other genetic elements), as well as epigenetic changes  
66 affecting the expression of cancer genes. It should be pointed out that these mechanisms are not

67 mutually exclusive: there are many examples illustrating the point that the wild type form of a  
68 cancer gene may be converted to a driver gene by multiple types of the above mechanisms.

69 Exomic studies of common solid tumors revealed that usually several cancer genes  
70 harbor subtle somatic mutations (point mutations, short deletions and insertions) in their  
71 translated regions but malignancy-driving subtle mutations can also occur in all genetic elements  
72 outside the coding region, namely in enhancer, silencer, insulator and promoter regions as well  
73 as in 5'- and 3'-untranslated regions. Intron or splice site mutations that alter the splicing pattern  
74 of cancer genes can also drive carcinogenesis [1]. A recent study has presented a comprehensive  
75 analysis of driver point mutations in non-coding regions across 2,658 cancer genomes [2]. A  
76 noteworthy example of how subtle mutations in regulatory regions may activate proto-oncogenes  
77 is the telomerase reverse transcriptase gene *TERT* that encodes the catalytic subunit of  
78 telomerase. Recurrent somatic mutations in melanoma and other cancers in the *TERT* promoter  
79 cause tumor-specific increase of *TERT* expression, resulting in the immortalization of the tumor  
80 cell [3].

81 In addition to subtle mutations, tumors also accumulate major chromosomal changes [4].  
82 Most solid tumors display widespread changes in chromosome number, as well as chromosomal  
83 deletions and translocations [5]. Homozygous deletions of a few genes frequently drive  
84 carcinogenesis and the target gene involved in such deletions is always a tumor suppressor gene  
85 [6]. Somatic copy-number alterations, amplifications of cancer genes are also widespread in  
86 various types of cancers. In tumor tissues amplifications usually contain an oncogene whose  
87 protein product is abnormally active simply because the tumor cell contains 10 to 100 copies of  
88 the gene per cell, compared with the two copies present in normal cells [7, 8]. Chromosomal  
89 translocations may also convert wild type forms of tumor suppressor genes into forms that drive

90 carcinogenesis if the translocation inactivates the genes by truncation or by separating them from  
91 their promoter. Similarly, translocations may activate proto-oncogenes by changing their  
92 regulatory properties [9].

93         The activity of cancer genes may also be altered by epigenetic mechanisms such as DNA  
94 methylation and histone modifications. It is now widely accepted that genetic and epigenetic  
95 changes go hand in hand in carcinogenesis: numerous genes involved in shaping the epigenome  
96 are mutated in common human cancers, and many genes carrying driver mutations are also  
97 affected by epigenetic changes [10-14]. For example, promoter hypermethylation events may  
98 promote carcinogenesis if they lead to silencing of tumor suppressor genes; the tumor-driving  
99 role of promoter methylation is quite obvious in cases when the same tumor suppressor genes are  
100 also frequently inactivated by mutations in cancer [15]. Conversely, there is now ample evidence  
101 that promoter hypomethylation can promote carcinogenesis if they lead to increased expression  
102 of proto-oncogenes [16].

103         Only recently was it discovered that non-coding RNAs (ncRNAs) also play key roles in  
104 carcinogenesis [17]. An explosion of studies has shown that – based on complementary base  
105 pairing – ncRNAs may function as oncogenes (by inhibiting the activity of tumor suppressor  
106 genes), or as tumor suppressors (by inhibiting the activity of oncogenes or tumor essential  
107 genes).

108         Alterations in the splicing of primary transcripts of protein-coding genes have also been  
109 shown to contribute to carcinogenesis. Recent studies on cancer genomes have revealed that  
110 recurrent somatic mutations of genes encoding RNA splicing factors (e.g. *SF3B1*, *U2AF1*,  
111 *SRSF2*, *ZRSR2*) lead to altered splice site preferences, resulting in cancer-specific mis-splicing of  
112 genes. In the case of proto-oncogenes, changes in the splicing pattern may generate active

113 oncoproteins, whereas abnormal splicing of tumor suppressor genes is likely to generate inactive  
114 forms of the tumor suppressor protein [18].

115         There is now convincing evidence that dysregulation of processes responsible for  
116 proteostasis also contributes to the development and progression of numerous cancer types [19-  
117 21]. Recent studies on tumor tissues have revealed that genetic alterations and abnormal  
118 expression of various components of the protein homeostasis pathways (e.g. *FBXW7*, *VHL*)  
119 contribute to progression of human cancers by excessive degradation of tumor-suppressor  
120 molecules or through impaired disposal of oncogenic proteins [22-23].

121

## 122 **Hallmarks of cancer and the function of genes involved in carcinogenesis**

123         Hanahan and Weinberg have defined a set of hallmarks of cancer that allow the  
124 categorization of cancer genes with respect to their role in carcinogenesis [24]. These hallmarks  
125 describe the biological capabilities that are usually acquired during the evolution of tumor cells:  
126 these include sustained proliferative signaling, evasion of growth suppressors, evasion of cell  
127 death, acquisition of replicative immortality, acquisition of capability to induce angiogenesis and  
128 activation of invasion and metastasis. Underlying all these hallmarks are defects in genome  
129 maintenance that help the acquisition of the above capabilities. Additional emerging hallmarks of  
130 potential generality have been suggested to include tumor promoting inflammation, evasion of  
131 immune destruction and reprogramming of energy metabolism in order to most effectively  
132 support neoplastic proliferation [24].

133         **Figure 1** summarizes our current view of the cellular processes that play key roles in  
134 tumor evolution to emphasize their contribution to the various major hallmarks of cancer. In this  
135 representation changes in the maintenance of the genome, epigenome, transcriptome and

136 proteome occupy a central position since they increase the chance that various constituents of  
137 other cellular pathways will experience alterations that favor the acquisition of capabilities that  
138 permit the proliferation, survival and metastasis of tumor cells.

139

## 140 **Chronology of tumor evolution: initiation and progression**

141 In the first phase of carcinogenesis a cell may acquire a mutation that permits it to  
142 proliferate abnormally, in the next phase other mutations allow the expansion of cell number and  
143 this process of mutations (and associated epigenetic, transcriptomic and proteomic alterations)  
144 continues, thus generating a primary tumor that can eventually metastasize to distant organs.  
145 Recent studies on the chronology and genomic landscape of the events that drive carcinogenesis  
146 in multiple myeloma suggest that complex structural changes of the genome occur early, whereas  
147 point mutations occur in later disease phases [25].

148 Individual instances of cancer may be initiated by specific combinations of mutations  
149 affecting a small number of cancer genes. According to current estimates the number of cancer  
150 driving mutations needed for the full development of cancer ranges from two-eight depending on  
151 cancer type [26-27]. A recent integrative analysis of 2,658 whole-cancer genomes and their  
152 matching normal tissues across 38 tumor types revealed that, on average, cancer genomes  
153 contain 4–5 driver mutations [28].

154 Although the temporal order of the mutations affecting genes of key pathways differs  
155 among cancer types, it appears that a common feature is that mutations of genes that regulate  
156 apoptosis occur in the early phases of tumor progression, whereas mutations of genes involved in  
157 invasion pathways are observed only in the last stages of carcinogenesis [29]. It has been  
158 suggested that the reason why the loss of apoptotic control is a critical step for initiating cancer is

159 that the larger the surviving cell population, the higher the number of cells at risk of acquiring  
160 additional mutations.

161 Analyses of the mutation landscapes and evolutionary trajectories of various tumor  
162 tissues have identified *BRAF*, *KRAS*, *TP53*, *RB* or *APC* as the key genes whose mutation is most  
163 likely to initiate carcinogenesis, permitting the cell to divide abnormally [26]. In the case of  
164 ovarian cancers *TP53* mutation is believed to be the earliest tumorigenic driver event, with  
165 presence in nearly all cases of ovarian cancer [30]. The prevalence of *TP53* mutations and *BRCA*  
166 deficiency in these tumors leads to incompetent DNA repair promoting subsequent steps of  
167 carcinogenesis. Studies on the evolution of melanoma from precursor lesions have revealed that  
168 the vast majority of melanomas harbored *TERT* promoter mutations, indicating that these  
169 immortalizing mutations are selected at an unexpectedly early stage of neoplastic progression  
170 [31].

171 The life history and evolution of mutational processes and driver mutation sequences of  
172 38 types of cancer has been analyzed recently by whole-genome sequencing analysis of 2,658  
173 cancers. This study has shown that early oncogenesis is characterized by mutations in a  
174 constrained set of driver genes and that the driver mutations that most commonly occur in a  
175 given cancer also tend to occur the earliest [32].

176

## 177 **Cancer genes and passenger genes**

178 The prominent role of *KRAS* and *TP53* genes in initiating carcinogenesis is also reflected  
179 by the observation that their mutation rate in tumors far exceeds those of other genes, suggesting  
180 that their mutations are subject to positive selection during tumor evolution. Since one of the  
181 major goals of cancer research is to identify all genes that drive carcinogenesis, several types of



182 approaches have been developed based on the premise that, thanks to positive selection, the rate  
183 of mutation of ‘driver genes’ must be significantly higher in the tumor tissue than those of  
184 ‘passenger genes’ that have no role in the development of cancer but simply happen to mutate in  
185 the same tumor [33-34].

186 Unfortunately, methods based on mutation frequency alone cannot reliably indicate  
187 which genes are cancer drivers because the background mutation rates differ significantly as a  
188 consequence of intrinsic characteristics of DNA sequence and chromatin structure [35]. Mutation  
189 hotspots that depend on the nucleotide sequence context, the mechanism of mutagenesis and the  
190 action of the repair and replication machineries are called intrinsic mutation hotspots [36]. Genes  
191 enriched in intrinsic mutation hotspots may accumulate mutations at a significantly higher rate  
192 than other genes, creating the illusion of positive selection: based on recurrent mutations they  
193 may be mistakenly identified as cancer driver genes [37-38].

194 In principle this danger may be avoided if we compare the mutation pattern of the gene in  
195 the tumor tissue with that in the normal tissue the tumor has originated from. However, since the  
196 rate of mutation in such hotspots depends not only on the nucleotide sequence but also on the  
197 mechanism of mutagenesis and the integrity of DNA repair pathways [38-39] mutation hotspots  
198 that arise during carcinogenesis could still create the illusion of positive selection.

199 Chromatin organization is also known to have a major influence on regional mutation  
200 rates in human cancer cells [40-41]. Since large-scale chromatin features, such as replication  
201 time and accessibility influence the rate of mutations, this may hinder the distinction of cancer  
202 driver genes whose high mutation rate reflects positive selection and passenger genes whose high  
203 mutation rate is the result of the distinctive features of the chromatin region in which they reside.  
204 Moreover, since the cell-of-origin chromatin organization shapes the mutational landscape, rates

205 of somatic mutagenesis of genes in cancer are highly cell-type-specific [42]. Actually, since  
206 regional mutation density of ‘passenger’ mutations across the human chromosomes is correlated  
207 with the cell type the tumor had originated from, this feature may be used to classify human  
208 tumors [43].

209 By comparing the exome sequences of 3,083 tumor-normal pairs Lawrence and  
210 coworkers [44] have discovered an extraordinary variation in mutation frequency and spectrum  
211 within cancer types across the genome, which is strongly correlated with DNA replication timing  
212 and transcriptional activity. The authors have shown that by incorporating mutational  
213 heterogeneity into their analyses, many of the apparent artefactual findings could be eliminated  
214 improving the identification of genes truly associated with cancer. In a more recent study  
215 Lawrence *et al.* [45] compared the frequency of somatic point mutations in exome sequences  
216 from 4,742 human cancers and their matched normal-tissue samples across 21 cancer types and  
217 identified 33 genes that were not previously known to be significantly mutated in cancer. They  
218 have concluded that a total of 224 genes are significantly mutated in one or more tumor types.

219 However, since background mutational frequency estimates are not sensitive enough, the  
220 list of driver genes identified on the basis of somatic mutation rate alone is likely to be  
221 incomplete, but may also contain false positives. To overcome these limitations of mutation rate-  
222 based approaches, several attempts have been made to use additional features that may  
223 distinguish driver genes and passenger genes. A major group of such approaches incorporates  
224 observations about the impact of mutations on the structure and function of well-characterized  
225 proteins encoded by proto-oncogenes and tumor suppressor genes. Several computational  
226 methods have been developed to identify driver missense mutations most likely to generate  
227 functional changes that causally contribute to tumorigenesis [46-48].

228 In a different type of approach Youn and Simon [49] identified cancer driver genes as  
229 those for which the non-silent mutation rate is significantly greater than a background mutation  
230 rate estimated from silent mutations, indicating that the non-silent mutations are subject to  
231 positive selection. The authors have identified 28 genes as driver genes, the majority of the  
232 significant matches (e.g. *EGFR*, *CDKN2A*, *KRAS*, *STK11*, *TP53*, *NF1*, *RBI* *PTEN* and *NRAS*),  
233 were well characterized oncogenes or tumor suppressor genes known from earlier studies.

234 In a more recent study Zhou *et al.* [50] have identified 365 genes for which the ratio of  
235 the nonsynonymous to synonymous substitution rate was significantly increased, suggesting that  
236 they are subject to the positive selection of driver mutations. It should be pointed out here that an  
237 obvious limitation of such approaches is that they implicitly assume that synonymous  
238 substitutions are – *per definitionem* – silent and are thus selectively neutral since they do not  
239 affect the sequence of the protein. However, the fact should not be ignored that this is not  
240 necessarily true: some synonymous mutations may have a significant impact on splicing, RNA  
241 stability, RNA folding and translation of the transcript of the affected gene and may thus actually  
242 act as driver mutations [51-53].

243 Vogelstein *et al.* [54] have used a heuristic approach to identify cancer driver genes.  
244 Since the patterns of mutations in the first and best-characterized oncogenes and tumor  
245 suppressor genes were found to be highly characteristic and nonrandom, the authors assumed  
246 that the same characteristics are generally valid and may be used to identify previously  
247 uncharacterized cancer genes. For example, since many known oncogenes were found to be  
248 recurrently mutated at the same amino acid positions, to classify a gene as an oncogene, it was  
249 required that >20% of the recorded mutations in the gene are at recurrent positions and are  
250 missense. Similarly, since in the case of known tumor suppressors the driver mutations most

251 frequently truncate the tumor suppressor proteins, to be classified as a tumor suppressor gene, it  
252 was required that >20% of the recorded mutations in the gene are truncating (nonsense or  
253 frameshift) mutations. Along these lines, Vogelstein *et al.*, [54] have analyzed the patterns of the  
254 subtle mutations in the Catalogue of Somatic Mutations in Cancer (COSMIC) database to  
255 identify driver genes. As a proof of the reliability of this “20/20 rule” it was emphasized that all  
256 well-documented cancer genes passed these criteria [54]. Although this indicates that the  
257 approach detects known cancer genes, it does not guarantee that it detects all driver genes.  
258 Acknowledging that additional cancer driver genes might exist, the authors have introduced the  
259 term “Mut-driver gene” for genes that contain a sufficient number or type of driver gene  
260 mutations to unambiguously distinguish them from other genes, whereas for cancer genes that  
261 are expressed aberrantly in tumors but not frequently mutated they proposed the term “Epi-driver  
262 gene”.

263         Based on these analyses, it has been concluded that out of the 20,000 human protein-  
264 coding genes, only 125 genes qualify as Mut-driver genes, of these, 71 are tumor suppressor  
265 genes and 54 are oncogenes [54]. Although the authors have expressed their conviction that  
266 nearly all genes mutated at significant frequencies had already been identified and that the  
267 number of Mut-driver genes is nearing saturation, this conclusion may not be justified since the  
268 criteria used to identify oncogenes and tumor suppressors appear to be too stringent and  
269 somewhat arbitrary.

270         In search of additional cancer driver genes Tamborero *et al.* [55] employed five  
271 complementary methods to find genes showing signals of positive selection and identified a list  
272 of 291 “high-confidence cancer driver genes” acting on 3,205 tumors from 12 different cancer  
273 types. Bailey *et al.* [56] used multiple advanced algorithms to identify cancer driver genes and

274 driver mutations. Based on their PanCancer and PanSoftware analysis spanning 9,423 tumor  
275 exomes, comprising all 33 of The Cancer Genome Atlas projects and using 26 computational  
276 tools they have identified 299 driver genes showing signs of positive selection. Their sequence  
277 and structure-based analyses detected >3,400 putative missense driver mutations and 60%–85%  
278 of the predicted mutations were validated experimentally as likely drivers.

279 Zhao *et al.*, [57] have developed driverMAPS (Model-based Analysis of Positive  
280 Selection), a model-based approach for driver gene identification that captures elevated mutation  
281 rates in functionally important sites and spatial clustering of mutations. Using this approach the  
282 authors have identified 255 known driver genes as well as 170 putatively novel driver genes.

283 Currently COSMIC, the Catalogue Of Somatic Mutations In Cancer  
284 (<https://cancer.sanger.ac.uk>) is the most detailed and comprehensive resource for exploring the  
285 effect of subtle somatic mutations of driver genes in human cancer [58] but COSMIC also covers  
286 all the genetic mechanisms by which somatic mutations promote cancer, including non-coding  
287 mutations, gene fusions, copy-number variants. In parallel with COSMIC's variant coverage, the  
288 Cancer Gene Census (CGC, <https://cancer.sanger.ac.uk/census>) describes a curated catalogue of  
289 genes driving every form of human cancer [59]. CGC has recently introduced functional  
290 descriptions of how each gene drives disease, summarized into the cancer hallmarks. The 2018  
291 CGC describes in detail the effect of a total of 719 cancer-driving genes, encompassing Tier 1  
292 genes (574 genes) and a list of Tier 2 genes (145 genes) from more recent cancer studies that  
293 show less detailed indications of a role in cancer.

294 In a different type of approach, Torrente *et al.* [60] used comprehensive maps of human  
295 gene expression in normal and tumor tissues to identify cancer related genes. These analyses  
296 identified a list of genes with systematic expression change in cancer. The authors have noted

297 that the list is significantly enriched with known cancer genes from large, public, peer-reviewed  
298 databases, whereas the remaining ones were proposed as new cancer gene candidates. A recent  
299 study has provided a comprehensive catalogue of cancer-associated transcriptomic alterations  
300 with the top-ranking genes carrying both RNA and DNA alterations. The authors have noted that  
301 this catalogue is enriched for cancer census genes [61].

302 Using transposon mutagenesis in mice several laboratories have conducted forward  
303 genetic screens and identified thousands of candidate genetic drivers of cancer that are highly  
304 relevant to human cancer. The Candidate Cancer Gene Database (CCGD, [http://ccgd-](http://ccgd-starrlab.oit.umn.edu/)  
305 [starrlab.oit.umn.edu/](http://ccgd-starrlab.oit.umn.edu/)) is a manually curated database containing a unified description of all  
306 identified candidate driver genes [62].

307 In summary, although a variety of approaches have been developed to identify ‘cancer  
308 genes’, there is significant disagreement as to the number of genes involved in carcinogenesis.  
309 Some of the studies argue that the number is in the 200-700 range, other approaches suggest that  
310 their number may be much higher. Since the ultimate goal of cancer genome projects is to  
311 discover therapeutic targets it is important to identify all true cancer genes and distinguish them  
312 from passenger genes and candidates that do not play a significant role in the process of  
313 carcinogenesis.

314 It should be pointed out, however, that the majority of genomics-based methods were  
315 biased as they defined the aim of cancer genomics as the identification of mutated driver genes  
316 (equating them with ‘cancer genes’) that are causally implicated in oncogenesis [63]. In all these  
317 studies, the underlying rationale for interpreting a mutated gene as causal in cancer development  
318 is that the mutations are likely to have been positively selected because they confer a growth  
319 advantage on the cell population from which the cancer has developed. An inevitable

320 consequence of this focus on positive selection was that most studies neglected the possibility  
321 that negative selection may also play a significant role in tumor evolution.

322

## 323 **Carcinogenesis as an evolutionary process**

324 In principle, with respect to its effect on carcinogenesis, a somatic mutation may promote  
325 or may hinder carcinogenesis or may have no effect on carcinogenesis. In cancer genomics the  
326 mutations that promote carcinogenesis (and are subject to positive selection during tumor  
327 evolution) are called ‘driver mutations’ to distinguish them from ‘passenger mutations’ that do  
328 not play a role in carcinogenesis (and are not subject to positive or negative selection during  
329 tumor evolution). Mutations that impair the growth, survival and invasion of tumor cells have  
330 received much less attention although they are also expected to play a significant role in shaping  
331 the mutation pattern of genes during carcinogenesis. Hereafter we will refer to this category of  
332 mutations as ‘cancer blocking mutations’ since they are deleterious from the perspective of  
333 tumor growth.

334 In cancer research genes are usually assigned to just two categories with respect to their  
335 role in carcinogenesis: 1) ‘passenger genes’ (or bystander genes) that play no significant role in  
336 carcinogenesis and their mutations are passenger mutations; 2) ‘driver genes’ that drive  
337 carcinogenesis when they acquire driver mutations.

338 The problem with this usual binary driver gene-passenger gene categorization is that  
339 some genes with functions essential for the growth and survival of tumor cells (hereafter referred  
340 to as ‘tumor essential genes’) may not easily fit into the usual ‘driver gene’ category. It is to be  
341 expected that during tumor evolution the coding sequences of driver genes (tumor suppressor  
342 genes, proto-oncogenes), passenger genes and tumor essential genes will experience markedly

343 different patterns of selection. The mutation patterns of selectively neutral, *bona fide* passenger  
344 genes are likely to reflect the lack of positive and negative selection, whereas in the case of  
345 tumor essential genes purifying selection is expected to dominate. In the case of tumor  
346 suppressor genes, the mutation pattern would reflect positive selection for truncating driver  
347 mutations.

348 Proto-oncogenes, however are expected to show signs of both positive selection for  
349 activating mutations and negative selection for inactivating, ‘cancer blocking’ mutations as their  
350 activity is essential for their oncogenic role. It must be emphasized that in the coding regions of  
351 proto-oncogenes positive selection for driver mutations is expected to favor nonsynonymous  
352 substitutions over synonymous substitutions only at sites that are critical for the novel, oncogenic  
353 function. For these sites (and these sites only) the ratio of nonsynonymous to synonymous rates  
354 is expected to be significantly greater than one reflecting positive selection. If there are many  
355 such sites in a protein, or selection is extremely strong the overall nonsynonymous to  
356 synonymous ratio for the entire protein may also be significantly higher than one, otherwise the  
357 effect of positive selection on the synonymous to nonsynonymous ratio may be overridden by  
358 purifying selection at other sites [64].

359 In harmony with some of these expectations, using just the ratio of the nonsynonymous to  
360 synonymous substitution rate as a measure of positive or negative selection, Zhou *et al.* [50]  
361 have shown that in cancer genomes, the majority of genes had nonsynonymous to synonymous  
362 substitution rate values close to one, suggesting that they belong to the passenger gene category.  
363 The authors have identified a total of 365 potential cancer driver genes that had nonsynonymous  
364 to synonymous substitution rate values significantly greater than one (reflecting the dominance  
365 of positive selection), whereas 923 genes had nonsynonymous to synonymous substitution rate



366 values significantly less than one, leading the authors to suggest that these negatively selected  
367 genes may be important for the growth and survival of cancer cells.

368 Realizing that genes whose wild-type coding sequences are needed for tumor growth are  
369 also of key interest for cancer research Weghorn and Sunyaev [65] have also focused on the role  
370 of negative selection in human cancers. As the authors have pointed out, identification and  
371 analysis of true negatively selected, 'undermutated' genes is particularly difficult since the  
372 sparsity of mutation data results in lower statistical power, making conclusions less reliable.  
373 Although the signal of negative selection was exceedingly weak, the authors have noted that the  
374 group of negatively selected candidate genes is enriched in cell-essential genes identified in a  
375 CRISPR screen [66], consistent with the notion that one of the potential causes of negative  
376 selection is the maintenance of genes that are responsible for basal cellular functions. Based on  
377 pergene estimates of negative selection inferred from the pan-cancer analysis the authors have  
378 identified 147 genes with strong negative selection. The authors have noted that among the 13  
379 genes showing the strongest signs of negative selection there are several genes (*ATAT1*, *BCL2*,  
380 *CLIP1*, *GALNT6*, *CKAP5* and *REVI*) that are known to promote carcinogenesis.

381 In a similar work Martincorena *et al.* [67] have used the normalized ratio of non-  
382 synonymous to synonymous mutations, to quantify selection in coding sequences of cancer  
383 genomes. Using a nonsynonymous to synonymous substitution rate value  $>1$  as a marker of  
384 cancer genes under positive selection, they have identified 179 cancer genes, with about 50% of  
385 the coding driver mutations being found to occur in novel cancer genes. The authors, however,  
386 have concluded that purifying selection is practically absent in tumors since nearly all ( $> 99\%$ )  
387 coding mutations are tolerated and escape negative selection. The authors have suggested that  
388 this remarkable absence of negative selection on coding point mutations in cancer indicates that

389 the vast majority of genes are dispensable for any given somatic lineage, presumably reflecting  
390 the buffering effect of diploidy and the inherent resilience and redundancy built into most  
391 cellular pathways.

392 The key message of Martincorena *et al.* [67] that negative selection has no role in cancer  
393 evolution had a major impact on cancer genomics research as reflected by several commentaries  
394 in major journals of the field that have propagated this conclusion [68-70].

395 In view of the contradicting conclusions of Martincorena *et al.* [67], Weghorn and  
396 Sunyaev [65] and Zhou *et al.*, [50] it is important to reexamine the significance of negative  
397 selection of protein-coding genes in tumor evolution. As pointed out above, detection of negative  
398 selection may have been impeded by the fact that putative tumor essential genes – unlike  
399 classical driver genes – are likely to be undermutated and the tools used for the analyses may  
400 have not been sensitive enough to identify weaker signals of selection. In the present work we  
401 have tried to overcome these problems by limiting our work to transcripts of human genes that  
402 have at least 100 verified somatic mutations. Furthermore, to increase the sensitivity of our  
403 approach we have used analyses combining different signals of selection manifested in  
404 synonymous, nonsynonymous, nonsense substitutions as well as subtle inframe and frameshift  
405 indels.

406 In the present work we have identified a large group of human genes that show clear  
407 signs of negative selection during tumor evolution, suggesting that their functional integrity is  
408 essential for the growth and survival of tumor cells. Significantly, the group of negatively  
409 selected genes includes genes that play critical roles in the Warburg effect of cancer cells, others  
410 mediate invasion and metastasis of tumor cells, indicating that negatively selected tumor  
411 essential genes may prove a rich source for novel targets for tumor therapy.

412 Improved detection of signals of selection has also permitted the identification of  
413 numerous novel cancer gene candidates that are likely to play important roles in carcinogenesis  
414 as tumor suppressor genes or as oncogenes.

415

## 416 **Results**

417 Cancer somatic mutation data were extracted from COSMIC v88, the Catalogue Of  
418 Somatic Mutations In Cancer, which includes single nucleotide substitutions and small  
419 insertions/deletions affecting the coding sequence of human genes. The downloaded file  
420 (CosmicMutantExport.tsv, release v88) contained data for 29415 transcripts (**Supplementary**  
421 **Table 1**). For all subsequent analyses we have retained only transcripts containing mutations that  
422 were annotated under 'Mutation description' as substitution or subtle insertion/deletion. This  
423 dataset contained data for 29405 transcripts containing 6449721 mutations (substitution and  
424 short indels, SSI) and 29399 transcripts containing 6141650 substitutions only (SO).  
425 **Supplementary Table 2** contains the metadata for these SO and SSI datasets.

426 To increase the statistical power of our analyses we have limited our work to transcripts  
427 that have at least 100 somatic mutations. Hereafter, unless otherwise indicated, our analyses refer  
428 to datasets containing transcripts with at least 100 somatic mutations. This limitation eliminated  
429 ~38% of the transcripts that contain very few mutations but reduced the number of total  
430 mutations only by 9% (**Supplementary Table 1**). It should be noted that this limitation increases  
431 the statistical power of our analyses but disfavors the identification of some negatively selected  
432 genes.

433 Since we were interested in the selection forces that operate during tumor, only  
434 confirmed somatic mutations were included in our analyses. In COSMIC such mutations are

435 annotated under 'Mutation somatic status' as Confirmed Somatic, i.e. confirmed to be somatic in  
436 the experiment by sequencing both the tumor and a matched normal tissue from the same patient.  
437 As to 'Sample Type, Tumor origin': we have excluded mutation data from cell-lines, organoid-  
438 cultures, xenografts since they do not properly represent human tumor evolution at the organism  
439 level. We have found that by excluding cell lines we have eliminated many artifacts of spurious  
440 recurrent mutations caused by repeated deposition of samples taken from the same cell-line at  
441 different time-points. To eliminate the influence of polymorphisms on the conclusions we  
442 retained only somatic mutations flagged 'n' for SNPs. (**Supplementary Table 1**).  
443 **Supplementary Table 3** contains the metadata for transcripts containing at least 100 confirmed  
444 somatic, non polymorphic mutations identified in tumor tissues.

445 As the gold standard of 'known' cancer genes we have used the lists of oncogenes (OG)  
446 and tumor suppressor genes (TSG) identified by Vogelstein *et al.* [54]. As another list of  
447 'known' cancer genes we have also used the genes of the Cancer Gene Census [59].

448 In our datasets the numerical variables for sets of human genes were expressed as mean  
449 and standard deviation for each group of data. For each variable, the means for the various  
450 groups were compared using the t-test for independent samples. Statistical significance was set  
451 as a P value of <0.05.

452 We have used several approaches to estimate the contribution of silent, amino acid  
453 changing and truncating mutations to somatic mutations of human protein-coding genes during  
454 tumor evolution. We have used two major types of calculations: one in which we have restricted  
455 our analyses to single nucleotide substitutions (hereafter referred to as SO for 'substitution only')  
456 and a version in which we have also taken into account subtle indels (hereafter referred to as SSI  
457 for 'substitutions and subtle indels').

458

## 459 **Analyses of subtle mutations in tumor tissues**

460 In the simplest case we have calculated for each transcript the fraction of somatic  
461 substitutions that could be assigned to the synonymous (fS), nonsynonymous (fM) and nonsense  
462 mutation (fN) category (**Supplementary Tables 2 and 3**). In the version that also included data  
463 for indels we have calculated the fraction of mutations corresponding to synonymous  
464 substitutions (indel\_fS), but have merged nonsynonymous substitutions and short inframe indels  
465 in the category of mutations that lead to changes in the amino acid sequence (indel\_fM).  
466 Nonsense substitutions and short frame-shift indels were included in the third category of  
467 mutations (indel\_fN) as both types of mutation lead eventually to stop codons that truncate the  
468 protein (**Supplementary Table 2 and 3**).

469 Analyses of datasets (**Supplementary Table 3**) containing substitutions only have shown  
470 that in 3D scatter plots transcripts are present in a cluster (**Figure 2A**) characterized by values of  
471  $0.2436 \pm 0.0619$ ,  $0.7090 \pm 0.0556$  and  $0.0475 \pm 0.0322$  for synonymous, nonsynonymous and  
472 nonsense substitutions, respectively. The mean values for synonymous, nonsynonymous and  
473 nonsense substitutions in this cluster are very close to those expected if we assume that the  
474 structure of the genetic code has the most important role in determining the probability of  
475 somatic substitutions during tumor evolution of human genes (**Supplementary Table 4**). Since  
476 each codon can undergo nine types of single-base substitutions, point mutations in the 61 sense  
477 codons can lead to 549 types of single-base substitutions. Of these, 392 result in the replacement  
478 of one amino acid by another (nonsynonymous substitutions), whereas 134 result in silent  
479 mutations (synonymous substitutions) and 23 generate stop codons [64]. Based on the structure  
480 of the genetic code, in the absence of selection one would thus expect that a fraction of 0.24408

481 would be synonymous, 0.71403 of the single-base substitutions would be nonsynonymous and  
482 0.04189 would be nonsense mutations.

483 It is noteworthy, however, that the fS, fM and fN values of the best known cancer genes  
484 Vogelstein *et al.*, [54] deviate from those characteristic of the majority of human genes (**Figure**  
485 **2B**). In harmony with earlier observations, the values for OGs show a marked shift of fM to  
486 higher values, reflecting positive selection for missense mutations, whereas the fN values of  
487 TSGs are significantly higher, reflecting positive selection for truncating nonsense mutations  
488 (**Supplementary Table 4**).

489 The genes (6198 transcripts) with values that deviate from mean values of fS, fM and fN  
490 by more than 1SD have also included the majority of OGs and TSGs; only 4 OG transcripts are  
491 present in the central cluster deviating from mean fM, fS and fN values by  $\leq 1SD$ . It is  
492 noteworthy that the 6198 transcripts also contained the majority (440 out of 741) of the  
493 transcripts of CGC genes, suggesting that the mutation pattern of most CGC genes also deviates  
494 significantly from those of passenger genes present in the central cluster (**Supplementary Table**  
495 **4**). The genes in the central cluster are characterized by fraction values of  $0.24548 \pm 0.03079$ ,  
496  $0.71084 \pm 0.0274$  and  $0.04368 \pm 0.01572$  for synonymous, nonsynonymous and nonsense  
497 substitutions, respectively. Note that these values are very close to those expected from the  
498 structure of the genetic code in the absence of selection (**Supplementary Table 4**). This central  
499 cluster of genes (**Supplementary Table 3**) is hereafter referred to as PG\_SO<sup>f-1SD</sup> (for Passenger  
500 Gene\_Substitution Only deviating from mean fM, fS and fN values by  $\leq 1SD$ ).

501 The genes (1060 transcripts) with values that deviate from mean values of fS, fM and fN  
502 by more than 2SD included 62 OG and 119 TSG driver gene transcripts, but 42 driver gene  
503 transcripts were present in the cluster that deviates from the mean by  $\leq 2SD$ . Using this more

504 stringent cut-off value the number of additional CGC genes represented in the 1060 transcripts  
505 was reduced to 142 out of 741 (**Supplementary Table 4**). This candidate cancer gene set defined  
506 by 2SD cut-off value is hereafter referred to as  $CG\_SO^{f-2SD}$  for Cancer Gene\_Substitution Only  
507 deviating from mean fM, fS and fN values by more than 2SD (**Supplementary Table 4**).

508 Out of the 1060 transcripts present in  $CG\_SO^{f-2SD}$ , 737 transcripts are derived from genes  
509 that are not included in the OG, TSG and CGC cancer gene lists (**Supplementary Table 3 and**  
510 **4**). Since the majority of these 737 transcripts (derived from 617 genes) have parameters that  
511 assign them to the OG or TSG clusters, we assume that they also qualify as candidate oncogenes  
512 or tumor suppressor genes. There is, however, a third group of genes that deviate from both the  
513 central passenger gene cluster and the clusters of OGs and TSGs (**Figure 2B**): their high fS and  
514 low fM and fN values suggest that they experience purifying selection during tumor evolution,  
515 raising the possibility that they may correspond to tumor essential genes (TEGs) important for  
516 the growth and survival of tumors. The 617 putative cancer genes listed in  $CG\_SO^{f-2SD}$  of  
517 **Supplementary Table 3**, were subjected to further analyses to decide whether they qualify as  
518 candidate oncogenes, tumor suppressor genes, tumor essential genes or the deviation of their  
519 mutation pattern from those of passenger genes is not the result of selection (see section on  
520 **Analyses of candidate cancer gene sets**).

521 Known cancer genes (OGs and TSGs) also separate from the majority of human genes in  
522 3D scatter plots of parameters rSM, rNM, rNS defined as the ratio of fS/fM, fN/fM, fN/fS,  
523 respectively (**Figure 3**). In these plots OGs separate from the central cluster in having lower rSM  
524 and rNM values, whereas TSGs have higher rNS and rNM values than those of the central  
525 cluster ((**Figure 3, A1, A2, Supplementary Table 4**). The set of genes (4744 transcripts) with  
526 values that deviate from the mean by more than 1SD contained 80 OG transcripts, 132 TSG

527 transcripts and an additional 371 CGC gene transcripts. The central cluster of genes (that deviate  
528 from mean rSM, rNM and rNS values by  $\leq 1SD$  is hereafter referred to as PG\_SO<sup>r<sup>2</sup>-1SD</sup> (for  
529 Passenger Gene\_Substitution Only deviating from mean rSM, rNM and rNS values by  $\leq 1SD$ ).

530 The candidate cancer gene set defined by 2SD cut-off value (**Supplementary Table 3**) is  
531 hereafter referred to as CG\_SO<sup>r<sup>2</sup>-2SD</sup> for Cancer Gene\_Substitution Only deviating from mean  
532 rSM, rNM, rNS values by more than 2SD (**Supplementary Table 4**). This gene set has a total of  
533 780 transcripts, containing 40 transcripts of OGs, 103 transcripts of TSGs genes, an additional 79  
534 transcripts of CGC genes and 558 transcripts derived from 468 genes that are not found in the  
535 OG, TSG and CGC cancer gene lists (**Supplementary Table 4**).

536 The mean parameters of TSGs differ markedly from those of passenger genes in that rNS  
537 and rNM values are higher (**Figure 3A1, A2. Supplementary Table 4**), reflecting the  
538 dominance of positive selection for inactivating mutations. The parameters for OGs on the other  
539 hand, differ from those of passenger genes in that rSM and rNM values are significantly lower  
540 (**Figure 3A1, A2 and Supplementary Table 4**), reflecting positive selection for missense  
541 mutations and negative selection of nonsense mutations. Interestingly, in these plots some  
542 oncogenes (e.g. *BCL2*) have unusually high values of rSM and low values of rNM (e.g. **Figures**  
543 **3A1, A2 and Supplementary Table 3**) suggesting that in the case of these oncogenes purifying  
544 selection may dominate over positive selection for amino acid changing mutations.

545 As mentioned above, the candidate cancer gene set defined by a cut-off value of 2SD  
546 contains 558 transcripts derived from 468 genes that are not found in the OG, TSG or CGC lists.  
547 Since the majority of these genes have parameters that assign them to the OG or TSG clusters,  
548 they can be regarded as candidate oncogenes or tumor suppressor genes. It is noteworthy,  
549 however, that there is a group of genes that deviate from the clusters of passenger genes, OGs



550 and TSGs in that they have unusually high rSM values and low rNM and rNS values. Since these  
551 values may be indicative of purifying selection we assumed that they may correspond to tumor  
552 essential genes important for the growth and survival of tumors. The 468 putative cancer genes  
553 listed in  $CG\_SO^{r^2-2SD}$  of **Supplementary Table 3** were subjected to further analyses to decide  
554 whether they qualify as candidate oncogenes, tumor suppressor genes or tumor essential genes  
555 (see section on **Analyses of candidate cancer gene sets**).

556 The separation of known cancer genes from the majority of human genes is even more  
557 obvious in 3D scatter plots of parameters rSMN, rMSN and rNSM defined as the ratio of  
558  $fS/(fM+fN)$ ,  $fM/(fS+fN)$  and  $fN/(fS+fM)$ , respectively (**Figure 4 A1, A2**). In these plots the gene  
559 transcripts are present in a three-pronged cluster, with OGs and TSG being present on separate  
560 spikes of this cluster (**Figure 4**).

561 The set of genes (4400 transcripts) with values that deviate from the mean by more than  
562 1SD contained 77 OG transcripts, 132 TSG transcripts and an additional 347 CGC gene  
563 transcripts. The central cluster of genes, deviating from mean rSMN, rMSN and rNSM values by  
564  $\leq 1SD$  is hereafter referred to as  $PG\_SO^{r^3-1SD}$  (for Passenger Gene\_Substitution Only deviating  
565 from mean rSMN, rMSN and rNSM values by  $\leq 1SD$ ).

566 The candidate cancer gene set defined by 2SD cut-off value (**Supplementary Table 3**) is  
567 hereafter referred to as  $CG\_SO^{r^3-2SD}$  for Cancer Gene\_Substitution Only deviating from mean  
568 rSMN, rMSN and rNSM values by more than 2SD (**Supplementary Table 4**). This gene set has  
569 a total of 751 transcripts, containing transcripts of 35 OGs, 103 TSGs, an additional 80 CGC  
570 genes and 533 transcripts (derived from 448 genes) not found in the OG, TSG and CGC cancer  
571 gene lists (**Supplementary Table 3 and 4**).

572 The mean parameters of TSGs differ markedly from those of passenger genes in as much  
573 as rNSM values of TSGs are higher but rSMN and rMSN values are lower (**Supplementary**  
574 **Table 4**), reflecting the dominance of positive selection for inactivating mutations. In the case of  
575 the majority of OGs the rMSN values are higher and rNSM and rSMN values are lower than  
576 those of passenger genes (**Supplementary Table 4**), reflecting positive selection for missense  
577 mutations and purifying selection avoiding nonsense mutations. Interestingly, some oncogenes  
578 have unusually high scores of rSMN (**Figures 4 A1, A2, Supplementary Table 3**) suggesting  
579 that in these cases (e.g. *BCL2*) purifying selection dominates over positive selection for amino  
580 acid changing mutations.

581 As mentioned above, the candidate cancer gene set defined by a cut-off values of 2SD  
582 contains 533 transcripts (derived from 448 genes) not found in the OG, TSG or CGC lists. Since  
583 the majority of these genes have parameters that assign them to the clusters containing OGs or  
584 TSGs, they can be regarded as candidate oncogenes or tumor suppressor genes.

585 In these 3D scatter plots the existence of a group of genes that deviates from the clusters  
586 of passenger genes, OGs and TSGs is even more obvious (**Figure 4**): their high rSMN and low  
587 rMSN and rNSM values suggest that they experience purifying selection during tumor evolution,  
588 suggesting that they may be essential for the survival of tumors as oncogenes or tumor essential  
589 genes. The putative cancer genes listed in  $CG\_SO^{r^3-2SD}$  of **Supplementary Table 3**, were  
590 subjected to further analyses to decide whether they qualify as candidate oncogenes, tumor  
591 suppressor genes or tumor essential genes (see section on **Analyses of candidate cancer gene**  
592 **sets**).

593 The three types of analyses for Substitutions Only, illustrated in **Figures 2-4** were also  
594 carried out for datasets in which both substitutions and subtle indels (Substitutions and Subtle

595 Indels, SSI) were used, by merging nonsynonymous substitutions and short inframe indels in the  
596 category of mutations that introduce subtle changes in the amino acid sequence (indel\_fm) and  
597 by including nonsense substitutions and short frame-shift indels in the category of mutations  
598 (indel\_fn) that generate stop codons. (For details of these analyses see **Additional file 1**).

599 Comparison of the data obtained by SO and SSI analyses (**Supplementary Table 3**)  
600 revealed that inclusion of indels has only minor influence on the separation of the clusters of PGs  
601 and CGs. For example, comparison of the lists of PGs identified with 1SD cut-off values for the  
602 three types of SO analyses (PG\_SO<sup>f-1SD</sup>, PG\_SO<sup>r2-1SD</sup>, PG\_SO<sup>r3-1SD</sup>) with the corresponding lists  
603 identified for SSI analyses (PG\_SSI<sup>f-1SD</sup>, PG\_SSI<sup>r2-1SD</sup>, PG\_SSI<sup>r3-1SD</sup>) revealed that the lists in  
604 the three types of SO/SSI pairs show more than 90% identity (**Supplementary Table 5**).  
605 Similarly, the lists of CGs identified with 2SD cut-off values for the three types of SO analyses  
606 (CG\_SO<sup>f-2SD</sup>, CG\_SO<sup>r2-2SD</sup>, CG\_SO<sup>r3-2SD</sup>) with the corresponding lists identified for SSI  
607 analyses (CG\_SSI<sup>f-2SD</sup>, CG\_SSI<sup>r2-2SD</sup>, CG\_SSI<sup>r3-2SD</sup>) revealed that the three pairs of lists show  
608 78%, 87% and 92% identity, respectively (**Supplementary Table 5**).

609

## 610 **Discussion**

### 611 **Analyses of candidate cancer gene sets**

612 The parameters of the 1158 transcripts present in at least one of the various CG\_SO<sup>2SD</sup>  
613 lists and the 1333 transcripts present in at least one of the various CG\_SSI<sup>2SD</sup> lists  
614 (**Supplementary Table 6**) differ from those of passenger genes in a way that assigns them to the  
615 clusters of genes positively selected for inactivating mutations or the clusters of genes positively  
616 selected for missense mutations or the clusters of negatively selected genes (see **Figure 2C**,

617 **Figure 3 B1, B2 and Figure 4 B1, B2**). To check the validity and predictive value of the  
618 assumption that the genes assigned to these clusters play significant roles in carcinogenesis we  
619 have selected a number of genes for further analyses from the 1457 transcripts present in the  
620 combined list (CG\_SO<sup>2SD</sup>\_SSI<sup>2SD</sup>) of candidate cancer genes (**Supplementary Table 6**).

621 The selection of genes was based on three criteria: 1) the candidate gene is among the  
622 genes showing the strongest signals of selection characteristic of the given group; 2) the  
623 candidate gene is novel in the sense that it is not listed among the 145 'gold standard' OG and  
624 TSG cancer genes of Vogelstein *et al.*, [54] or among the 719 genes of CGC [59]; 3) there is  
625 substantial experimental information in the scientific literature on the given gene to permit the  
626 assessment of the validity of the assumption that it plays a role in carcinogenesis.

627 The genes discussed below include genes positively selected for truncating mutations,  
628 genes positively selected for missense mutations and negatively selected genes. In the main text  
629 we summarize only the major conclusions of our analyses; annotation of the individual genes is  
630 found in **Additional file 2**. We discuss examples of negatively selected genes in somewhat  
631 greater detail in the main text since they were inevitably missed by earlier studies that focussed  
632 on positive selection of driver mutations. We also discuss some examples of 'false' hits, i.e.  
633 cases where the mutation parameters deviate significantly from those of passenger genes, but this  
634 deviation is not due to selection.

635

### 636 **Novel cancer genes positively selected for truncating mutations**

637 We have selected genes *B3GALT1*, *BMP2*, *BRD7*, *ING1*, *MGA*, *PRRT2*, *RASA1*,  
638 *RNF128*, *SLC16A1*, *SPRED1*, *TGIF1*, *TNRC6B*, *TTK*, *ZNF276*, *ZC3H13*, *ZFP36L2*, *ZNF750*

639 from the combined list of 1457 candidate transcripts (**Supplementary Table 6**), whose  
640 parameters deviate most significantly (by  $>2SD$ ) from those of passenger genes, with the  
641 additional restriction that only genes with  $indel\_rNSM > 0.125$  (624 genes) were included  
642 (**Supplementary Table 7**), thereby removing the majority of passenger genes, oncogenes and  
643 tumor essential genes.

644 Annotation of the majority of these genes (*BMPR2*, *BRD7*, *ING1*, *MGA*, *PRRT2*, *RASA1*,  
645 *RNF128*, *SLC16A1*, *SPRED1*, *TGIF1*, *TNRC6B*, *ZC3H13*, *ZFP36L2* and *ZNF750*) has provided  
646 convincing evidence for their role in carcinogenesis as tumor suppressors. Interestingly,  
647 experimental evidence indicates that *TTK*, encoding dual specificity protein kinase TTK, is a  
648 proto-oncogene that may be converted to an oncogene by truncating mutations affecting its very  
649 C-terminal end, downstream of its kinase domain (for further details see **Additional file 2**). Our  
650 annotations suggest that *B3GALT1*, *ZNF276* are false positives whose apparent mutation pattern  
651 deviates significantly from those of passenger genes, but this deviation is not due to selection.

652 Based on functional annotation of the novel cancer genes identified and validated in the  
653 present work (see **Additional file 2**) we have assigned them to various cellular processes of  
654 cancer hallmarks in which they are involved (**Table 1**).

655 Comparison of the list of 624 genes present in this dataset ( $CG\_SSI^{2SD} rNSM > 0.125$ )  
656 with lists identified by others (**Supplementary Table 7**) revealed that ~60-100 of our candidate  
657 TSG-like genes are also found in several gene lists identified by analyses of somatic mutations of  
658 tumor tissues. Many of the genes selected for annotation are present in at least one of the  
659 candidate gene lists identified by others; the genes of *MGA*, *RASA1*, *TGIF1*, *ZFP36L2* and  
660 *ZNF750* are present in multiple cancer gene lists (**Supplementary Table 7**). It is noteworthy,  
661 however, that *RNF128*, *SLC16A1*, *SPRED1*, *TNRC6B* and *TTK* are novel in that they are found

662 only among the candidate cancer genes identified by forward genetic screens in mice [62] or  
663 among the genes whose expression changes in cancer [60].

664

### 665 **Novel cancer genes positively selected for missense mutations**

666 We have selected genes *AURKA*, *CDK8*, *IDH3B*, *MARCH7*, *RIT1*, *YAP1*, *YES1* from the  
667 combined list of 1457 candidate transcripts, whose parameters deviate most significantly (by  
668 >2SD) from those of passenger genes (**Supplementary Table 7**), but only genes with  
669 rMSN>3.00 (440) were used, thereby removing the majority of passenger genes, tumor  
670 suppressor genes and tumor essential genes.

671 Annotation of these genes has confirmed that they play important roles in carcinogenesis  
672 as oncogenes. Three of these genes encode kinases (Aurora kinase A, also known as breast  
673 tumor-amplified kinase, cyclin-dependent kinase 8, tyrosine-protein kinase Yes, also known as  
674 proto-oncogene c-Yes) but unlike many other oncogenic kinases, these oncogenes do not show  
675 significant clustering of missense mutations. In fact, only in the case of *IDH3B* and *RIT1* did we  
676 observe clustering of missense mutations, indicating that recurrent mutation is not an obligatory  
677 property of proto-oncogenes.

678 Based on functional annotation of the novel oncogenes identified and validated in the  
679 present work (see **Additional file 2**) we have assigned them to various cellular processes of  
680 cancer hallmarks in which they are involved (**Table 1**).

681 Comparison of this list of 440 genes (CG\_SO<sup>2SD</sup> rMSN>3.00) with the lists of cancer  
682 genes identified by others (**Supplementary Table 7**) revealed that ~60-100 of our candidate  
683 oncogene-like genes are present in cancer gene lists identified by analyses of somatic mutations  
684 of tumor tissues.

685 Out of the genes that we have selected for annotation only the *RIT1* gene has been  
686 identified by others as an oncogene, based on the analysis of somatic mutations  
687 (**Supplementary Table 7**). *AURKA* and *IDH3B* are not found in any of the lists of cancer genes,  
688 whereas *CDK8*, *MARCH7*, *YAP1* and *YES1* are listed among the more than 9000 candidate  
689 cancer genes identified by forward genetic screens in mice [62]. Interestingly, *TTK*, identified as  
690 a gene positively selected for truncating mutations (see list CG\_SSI<sup>2SD</sup> rNSM > 0.125), but  
691 annotated as an oncogene, is also present in the list of genes positively selected for missense  
692 mutations (CG\_SO<sup>2SD</sup> rMSN>3.00).

693

#### 694 **Negatively selected tumor essential genes**

695 We have selected genes *CX3CR1*, *FOXG1*, *FOXP2*, *G6PD*, *MAPK13*, *MLLT3*, *NOVA1*,  
696 *PNCK*, *RUNX2*, *SLC16A3*, *SLC2A1*, *SLC2A8*, *TBP*, *TBXA2R*, *TP73*, *TRIB2* from the lists of  
697 cancer genes whose parameters deviate most significantly (by >2SD) from those of passenger  
698 genes, but only genes with rSMN > 0.5 (505 genes) were used to eliminate the majority of  
699 passenger genes, oncogenes and tumor suppressor genes.

700 Although our analyses have confirmed that in the majority of cases (*CX3CR1*, *FOXG1*,  
701 *G6PD*, *MAPK13*, *NOVA1*, *PNCK*, *SLC16A3*, *SLC2A1*, *SLC2A8*, *TBXA2R*, *TP73*, *TRIB2*) the  
702 high synonymous to nonsynonymous and synonymous to nonsense mutation rates could be  
703 interpreted as evidence for purifying selection during tumor evolution, there were several  
704 examples (e.g. *DSPP*, *FOXP2*, *MLLT3*, *RUNX2*, *TBP*) where high synonymous to  
705 nonsynonymous and synonymous to nonsense mutation rates were found to reflect increased  
706 rates of synonymous substitution (due to the presence of mutation hotspots), rather than

707 decreased rates of nonsynonymous and nonsense substitutions that could be due to purifying  
708 selection (for details see **Additional file 2**).

709 Annotation of the genes *CX3CR1*, *FOXG1*, *G6PD*, *MAPK13*, *NOVA1*, *PNCK*, *SLC16A3*,  
710 *SLC2A1*, *SLC2A8*, *TBXA2R*, *TP73*, *TRIB2* have confirmed that all of them play important roles  
711 in carcinogenesis (see **Additional file 2**) permitting their assignment to various cellular  
712 processes of cancer hallmarks (**Table 1**). In harmony with the notion that negative selection  
713 reflects their essential role in tumor evolution, there is evidence that they fulfill pro-oncogenic  
714 functions by promoting cell proliferation (*FOXG1*, *MAPK13*, *PNCK*, *TRIB2*), evasion of cell  
715 death (*MAPK13*, *PNCK*, *TP73*), promoting replicative immortality (*NOVA1*), reprogramming of  
716 energy metabolism of cancer cells (*G6PD*, *SLC16A3*, *SLC2A1*, *SLC2A8*), inducing tumor  
717 promoting inflammation (*CCR2*, *CCR5*, *CX3CR1*, *MAPK13*) and invasion and metastasis  
718 (*CCR2*, *CCR5*, *CX3CR1*, *TBXA2R*).

719 Not surprisingly, none of these genes are present in the lists of positively selected driver  
720 genes ( $CG\_SSI^{2SD} \text{ rNSM} > 0.125$  and  $CG\_SO^{2SD} \text{ rMSN} > 3.00$ , **Supplementary Table 7**). It is  
721 noteworthy, however, that *G6PD*, *MAPK13*, *PNCK*, *SLC16A3* and *SLC2A1* are listed among the  
722 candidate cancer genes identified by forward genetic screens in mice [62].

723 Comparison of our list of 505 negatively selected genes ( $CG\_SO^{2SD} \text{ rSMN} > 0.5$ ) with  
724 that of Weghorn and Sunyaev [65] has revealed very little similarity (**Supplementary Table 8**).  
725 Only 1 of the 147 genes identified by Weghorn and Sunyaev [65] is also present in the list of  
726 top-ranking negatively selected genes identified in the present study. A greater similarity was  
727 observed when we compared our list of negatively selected genes with that of Zhou *et al.* [50]:  
728 32 of the 112 genes identified by Zhou *et al.*, [50] are also present among the 505 negatively  
729 selected genes identified in the present work (**Supplementary Table 8**). It is noteworthy that



730 top-ranking genes present in both lists include the *TBP* gene, and the *MLLT3* gene. As discussed  
731 in **Additional file 2**, the apparent signals of negative selection (high synonymous to  
732 nonsynonymous rates) of genes like *DSPP*, *FOXP2*, *MLLT3*, *RUNX2* and *TBP* reflect the  
733 presence of mutation hotspots and not purifying selection. Zhou *et al.* [50] have noted that „some  
734 cancer genes also show negative selection in cancer genomes, such as the oncogene *MLLT3*”.  
735 Although they point out that „interestingly, *MLLT3* has recurrent synonymous mutations at  
736 amino acid positions 166 to 168” they do not seem to realize that this observation of recurrent  
737 silent substitutions (in a poly-Ser region of the protein) questions the validity of the claim that  
738 the unusually low nonsynonymous to synonymous rate is due to negative selection (for more  
739 detail see **Additional file 2**).

740         Otherwise, the lack of more extensive overlap of top-ranking negatively selected genes  
741 identified in the present study with those identified by others based on synonymous to  
742 nonsynonymous rates [50, 65] is probably due to the fact that in the present work we have  
743 combined multiple aspects of purifying selection and have increased the statistical power of our  
744 analyses by limiting our work to transcripts that have at least 100 somatic mutations.

745         It must also be pointed out that the conclusions drawn from earlier studies searching for  
746 signs of negative selection are highly controversial [50, 65, 67]. Zhou *et al.*, [50] have succeeded  
747 in identifying a large set of negatively selected genes that were suggested to be important for the  
748 growth and survival of cancer cells. Although Weghorn and Sunyaev [65] have acknowledged  
749 that in their analyses the signals of purifying selection were exceedingly weak, they have  
750 identified a group of negatively selected genes that was enriched in cell-essential genes [66],  
751 leading them to propose that the major cause of negative selection during tumor evolution is the  
752 maintenance of genes that are responsible for basal cellular functions.

753 The third, much-publicized study, however, propagated the conclusion that negative  
754 selection has no role in tumor evolution [67-70]. Martincorena *et al.* [67] have argued that the  
755 practical absence of purifying selection during tumor evolution is due to the buffering effect of  
756 diploidy and functional redundancy of most cellular pathways.

757 The influence of functional redundancy on the essentiality of genes has been examined in  
758 a recent study [71]. The authors have used CRISPR score profiles of 558 genetically  
759 heterogeneous tumor cell lines and converted continuous values of gene CRISPR scores to  
760 binary essential and nonessential calls. These analyses have shown that 1014 genes belong to a  
761 category of ‘broadly essential genes’, i.e. these genes were found to be essential in at least 90%  
762 of the 558 cell lines. De Kegel and Ryan [71] have shown that, compared to singleton genes,  
763 paralogs are less frequently essential and that this is more evident when considering genes with  
764 multiple paralogs or with highly sequence-similar paralogs.

765 In order to assess the contribution of cell-essentiality to purifying selection during tumor  
766 evolution we have plotted various measures of negative selection of human genes as a function  
767 of their cell-essentiality scores determined by De Kegel and Ryan [71]. These analyses have  
768 shown that the cell-essentiality scores of negatively selected genes ( $CG\_SO^{2SD}$   $rSMN > 0.5$ ) are  
769 not significantly different from those of passenger genes (**Figure 5**).

770 Comparison of CRISPR scores ( $-0.07665 \pm 0.17269$ ) of the cluster of negatively selected  
771 genes of  $CG\_SO^{2SD}$   $rSMN > 0.5$ ) listed in **Supplementary Table 8** with CRISPR scores ( $-$   
772  $0.09506 \pm 0.24168$ ) of cluster of passenger genes ( $PG\_SO^{r3\_1SD}$ ) revealed that they are not  
773 significantly different ( $p > 0.05$ ), indicating that cell-essentiality *per se* does not explain purifying  
774 selection.

775 Comparison of the lists of negatively selected genes identified in the present work with  
776 the 1014 ‘broadly essential genes’ defined by De Kegel and Ryan [71] has revealed that there is  
777 practically no overlap between the two groups. Only 6 of the 1014 broadly essential genes are  
778 included in our list of negatively selected genes (**Supplementary Table 8**). This observation also  
779 suggests that cell-essentiality defined by CRISPR scores determined experimentally on cell lines  
780 is not relevant for negative selection during tumor evolution *in vivo*.

781 Our analyses of cases of strong purifying selection suggest that it has more to do with a  
782 function specifically required by the tumor cell for its growth, survival and metastasis than with  
783 general basic cellular functions (**Table 1**). It is noteworthy in this respect, that the genes showing  
784 the strongest signals of negative selection include several plasma membrane receptor proteins  
785 (e.g. *ACKR3*, *CCR2*, *CCR5*, *CX3CR1*, *TBXA2R*) that cancer cells utilize to promote migration,  
786 invasion and metastasis (**Additional file 2**). Significantly, these proteins exert their biological  
787 functions (in cell migration, inflammation, angiogenesis etc.) primarily at the organism level,  
788 therefore their cell-essentiality scores may have little to do with their overall essentiality for  
789 tumor growth and metastasis. Inspection of the data of De Kegel and Ryan [71] shows that  
790 *ACKR3*, *CX3CR1*, *TBXA2R* were not assigned to the essential category in any of the 558 tumor  
791 cell lines tested.

792 Although negatively selected genes essential for carcinogenesis include proteins involved  
793 in cell-level processes, in that they promote cell proliferation (*FOXG1*, *MAPK13*, *PNCK*,  
794 *TRIB2*), evasion of cell death (*MAPK13*, *PNCK*, *TP73*), replicative immortality (e.g. *NOVA1*), or  
795 that they are crucial for the reprogramming of energy metabolism in cancer cells (e.g. *GAPD*,  
796 *SLC16A3*, *SLC2A1*, *SLC2A8*) their negative selection is unlikely to be a mere reflection of their  
797 basic cellular functions. Rather, it reflects the exceptional role of the corresponding cancer

798 hallmarks (evasion of cell death, replicative immortality, reprogramming of metabolism) in  
799 carcinogenesis (**Figure 1**). In harmony with this conclusion *NOVA1*, *SLC16A3*, *SLC2A8*, *TP73*  
800 were assigned to the essential category by De Kegel and Ryan [71] in less than 10% of the 558  
801 tumor cell lines tested. *SLC2A1* (glucose transporter 1) is an exception to some extent in as much  
802 as it was found to be cell-essential in 41% of the cell lines.

803       Significantly, several nutrient transporter protein genes (*SLC16A3*, *SLC2A1* and *SLC2A8*)  
804 were found among the genes showing strongest signs of purifying selection. The most likely  
805 explanation for their essentiality is that tumor cells have an increased demand for nutrients and  
806 this demand is met by enhanced cellular entry of nutrients through upregulation of specific  
807 transporters [72]. The uncontrolled cell proliferation of tumor cells involves major adjustments  
808 of energy metabolism in order to support cell growth and division in the hypoxic  
809 microenvironments in which they reside. Otto Warburg was the first to observe an anomalous  
810 characteristic of cancer cell energy metabolism: even in the presence of oxygen, cancer cells  
811 limit their energy metabolism largely to glycolysis, leading to a state that has been termed  
812 “aerobic glycolysis” [73, 74]. Cancer cells are known to compensate for the lower efficiency of  
813 ATP production through glycolysis than oxidative phosphorylation by upregulating glucose  
814 transporters, such as facilitated glucose transporter member 1, GLUT1 (encoded by the *SLC2A1*  
815 gene), thus increasing glucose import into the cytoplasm [75-77].

816       The markedly increased uptake of glucose has been documented in many human tumor  
817 types, by visualizing glucose uptake through positron emission tomography. The reliance of  
818 tumor cells on glycolysis is also supported by the hypoxia response system: under hypoxic  
819 conditions not only glucose transporters but also multiple enzymes of the glycolytic pathway are  
820 upregulated [75, 76, 78-80].

821 In our view, the central role of GLUT1 in cancer metabolism is reflected by the fact that  
822 the *SLC2A1* gene encoding this glucose transporter is among the genes that show the strongest  
823 signals of purifying selection. The key importance of GLUT1 in cancer may be illustrated by the  
824 fact that high levels of GLUT1 expression correlates with a poor overall survival and is  
825 associated with increased malignant potential, invasiveness and poor prognosis [81-83]. The  
826 strict requirement for GLUT1 in the early stages of mammary tumorigenesis highlights the  
827 potential for glucose restriction as a breast cancer preventive strategy [84]. The tumor  
828 essentiality of GLUT1 may also be illustrated by the fact that knockdown of GLUT1 inhibits cell  
829 glycolysis and proliferation and inhibits the growth of tumors [85]. In view of its essentiality for  
830 tumor growth, GLUT1 is a promising target for cancer therapy [86-88].

831 Recent studies suggest that the *YAP1-TEAD1-GLUT1* axis plays a major role in  
832 reprogramming of cancer energy metabolism by modulating glycolysis [89]. These authors have  
833 shown that *YAP1* and *TEAD1* are involved in transcriptional control of the glucose transporter  
834 *GLUT1*: whereas knockdown of *YAP1* inhibited glucose consumption, and lactate production of  
835 breast cancer cells, overexpression of GLUT1 restored glucose consumption and lactate  
836 production.

837 Besides GLUT1 another glucose transporter, GLUT8 (encoded by the *SLC2A8* gene) also  
838 shows strong signals of negative selection, arguing for its importance in tumor survival. In  
839 harmony with this interpretation there is evidence that GLUT8 is overexpressed in and is  
840 required for proliferation and viability of tumors [90-91].

841 Due to abnormal conversion of pyruvic acid to lactic acid by tumor cells even under  
842 normoxia, the altered metabolism of glucose consuming tumors must rapidly efflux lactic acid to

843 the microenvironment to maintain a robust glycolytic flux and to prevent poisoning themselves  
844 [92].

845 Survival and maintenance of the glycolytic phenotype of tumor cells is ensured by  
846 monocarboxylate transporter 4 (MCT4, encoded by the *SLC16A3* gene) that efficiently transports  
847 L-lactate out of the cell [72]. Significantly, MCT4, encoded by the *SLC16A3* gene also shows  
848 strong signals of negative selection, in harmony with its importance in tumor survival.

849 As high metabolic and proliferative rates in cancer cells lead to production of large  
850 amounts of lactate, extruding transporters are essential for the survival of cancer cells as  
851 illustrated by the fact that knockdown of MCT4 increased tumor-free survival and decreased *in*  
852 *vitro* proliferation rate of tumor cells [93]. Using a functional screen Baenke *et al.*, [94] have also  
853 demonstrated that monocarboxylate transporter 4 is an important regulator of breast cancer cell  
854 survival: MCT4 depletion reduced the ability of breast cancer cells to grow, suggesting that it  
855 might be a valuable therapeutic target. In harmony with the essentiality of MCT4 for tumor  
856 growth, several studies indicate that expression of the hypoxia-inducible monocarboxylate  
857 transporter MCT4 is increased in tumors and its expression correlates with clinical outcome, thus  
858 it may serve as a valuable prognostic factor [95-97]. Consistent with the key importance of  
859 MCT4 for the survival of tumor cells, its selective inhibition to block lactic acid efflux appears to  
860 be a promising therapeutic strategy against highly glycolytic malignant tumors [98-101].

861 Interestingly, the thromboxane A2 receptor gene (*TBXA2R*) as well as several chemokine  
862 receptor protein genes (*CCR2*, *CCR5*, *CX3CR1*) were also found among the genes showing  
863 strong signs of purifying selection. The most likely explanation for their essentiality for tumor  
864 growth is that tumor cells rely on these receptors in various steps of invasion and metastasis (see  
865 **Additional file 2**). It is noteworthy in this respect that another member of the family of

866 chemokine receptors, the atypical chemokine receptor 3, *ACKR3* is also among the genes  
867 showing very high values of rSMN, suggesting negative selection of missense and nonsense  
868 mutations (**Supplementary Table 7**). Significantly, *ACKR3* is a well-known oncogene, present  
869 in Tier 1 of the Cancer Gene Census. Several studies support the key role of *ACKR3* in tumor  
870 invasion and metastasis [102-107]. Since knock-down or pharmacological inhibition of *ACKR3*  
871 has been shown to reduce tumor invasion and metastasis, *ACKR3* is a promising therapeutic  
872 target for the control of tumor dissemination (for further details see **Additional file 2**).

873

## 874 **Conclusions**

875 One of the major goals of cancer research is to identify all ‘cancer genes’, i.e. genes that  
876 play a role in carcinogenesis. In the last two decades several types of approaches have been  
877 developed to achieve this goal, but the majority of the work focused on subtle mutations  
878 affecting the coding regions of genes. The implicit assumption of most of these studies was that a  
879 distinguishing feature of cancer genes is that they are positively selected for mutations that drive  
880 carcinogenesis. As a result of combined efforts the PCAWG driver list identifies a total of 722  
881 protein-coding genes as cancer driver genes and 22 non-coding driver mutations [2, 28].

882 In a recent editorial, commenting on a suite of papers on the genetic causes of cancer,  
883 Nature has expressed the view that the core of the mission of cancer-genome sequencing projects  
884 — to provide a catalogue of driver mutations that could give rise to cancer — has been achieved  
885 [108]. It is noteworthy, however, that, although on average, cancer genomes were shown to  
886 contain 4–5 driver mutations, in around 5% of cases no drivers were identified in tumors [28]. As  
887 pointed out by the authors, this observation suggests that cancer driver discovery is not yet  
888 complete, possibly due to failure of the available bioinformatic algorithms. The authors have also

889 suggested that tumors lacking driver mutations may be driven by mutations affecting cancer-  
890 associated genes that are not yet described for that tumor type, however, using driver discovery  
891 algorithms on tumors with no known drivers, no individual genes reached significance for point  
892 mutations [28].

893 In our view, these observations actually suggest that a rather large fraction of cancer  
894 genes remains to be identified. Assuming that tumors, on average, must have driver mutations  
895 affecting at least 4 or 5 cancer genes and that known and unknown cancer genes play similar  
896 roles in carcinogenesis, the observation that a 0.05 fraction of tumors has no known drivers (i.e.  
897 they are driven by 4-5 unknown cancer drivers) indicates that about half of the drivers is still  
898 unknown. If we assume that ~50% of cancer genes is still unknown 3-6% ( $0.5^5-0.5^4$ , i.e.  
899 0.03125-0.0625 fraction) of tumors is expected to lack any of the known driver genes, and to be  
900 driven by 4 or 5 unknown driver mutations. Since the list of known drivers used in the study of  
901 the ICGC/TCGA Pan-Cancer Analysis of Whole Genomes Consortium [28] comprises 722  
902 driver genes, these observations suggest that hundreds of cancer driver genes remain to be  
903 identified.

904 In the present work we have used analyses that combined multiple types of signals of  
905 selection, permitting improved detection of positive and negative selection. Our analyses have  
906 identified a large number of novel positively selected cancer gene candidates, many of which  
907 could be shown to play significant roles in carcinogenesis as tumor suppressors and oncogenes.  
908 Significantly, our analyses have identified a major group of human genes that show signs of  
909 strong negative selection during tumor evolution, suggesting that the integrity of their function is  
910 essential for the growth and survival of tumor cells. Our analyses of representative members of  
911 negatively selected genes have confirmed that they play crucial pro-oncogenic roles in various



912 cancer hallmarks (**Table 1**). It is important to emphasize that a survey of the group of oncogenes  
913 and pro-oncogenic tumor essential genes reveals that they form a continuum in as much as there  
914 are numerous known oncogenes where negative selection also dominates (e.g. *ACKR3*, *BCL2*).

915 Although some groups have investigated the role of negative selection in tumor evolution  
916 earlier [50, 65, 67] the study that received the greatest attention has reached the conclusion that  
917 negative selection has no role in tumor evolution [67-70]. The data presented here contradict this  
918 conclusion.

919 We believe that the approach reported here will promote the identification of numerous  
920 novel tumor suppressor genes, oncogenes and pro-oncogenic genes that may serve as therapeutic  
921 targets.

922

## 923 **Methods**

924 Cancer somatic mutation data were extracted from COSMIC v88, the Catalogue Of  
925 Somatic Mutations In Cancer, which includes single nucleotide substitutions and small  
926 insertions/deletions affecting the coding sequence of human genes. The downloaded file  
927 (CosmicMutantExport.tsv, release v88) contained data for 29415 transcripts (**Supplementary**  
928 **Table 1**). For all subsequent analyses we have retained only transcripts containing mutations that  
929 were annotated under 'Mutation description' as substitution or subtle insertion/deletion. This  
930 dataset contained data for 29405 transcripts containing 6449721 mutations (substitution and  
931 short indels, SSI) and 29399 transcripts containing 6141650 substitutions only (SO).

932 To increase the statistical power of our analyses we have limited our work to transcripts  
933 that have at least 100 somatic mutations. Hereafter, unless otherwise indicated, our analyses refer

934 to datasets containing transcripts with at least 100 somatic mutations. This limitation eliminated  
935 ~38% of the transcripts that contain very few mutations but reduced the number of total  
936 mutations only by 9% (**Supplementary Table 1**). It should be noted that this limitation increases  
937 the statistical power of our analyses but disfavors the identification of some negatively selected  
938 genes.

939         Since we were interested in the selection forces that operate during tumor, only  
940 confirmed somatic mutations were included in our analyses. In COSMIC such mutations are  
941 annotated under 'Mutation somatic status' as Confirmed Somatic, i.e. confirmed to be somatic in  
942 the experiment by sequencing both the tumor and a matched normal tissue from the same patient.  
943 As to 'Sample Type, Tumor origin': we have excluded mutation data from cell-lines, organoid-  
944 cultures, xenografts since they do not properly represent human tumor evolution at the organism  
945 level. We have found that by excluding cell lines we have eliminated many artifacts of spurious  
946 recurrent mutations caused by repeated deposition of samples taken from the same cell-line at  
947 different time-points. To eliminate the influence of polymorphisms on the conclusions we  
948 retained only somatic mutations flagged 'n' for SNPs. (**Supplementary Table 1**).

949         In our datasets the numerical variables for sets of human genes were expressed as mean  
950 and standard deviation for each group of data. For each variable, the means for the various  
951 groups were compared using the t-test for independent samples. Statistical significance was set  
952 as a P value of <0.05.

953         We have used several approaches to estimate the contribution of silent, amino acid  
954 changing and truncating mutations to somatic mutations of human protein-coding genes during  
955 tumor evolution. We have used two major types of calculations: one in which we have restricted  
956 our analyses to single nucleotide substitutions (referred to as SO for 'substitution only') and a

957 version in which we have also taken into account subtle indels (referred to as SSI for  
958 'substitutions and subtle indels').

959

## 960 **Ethics declarations**

### 961 **Ethics approval and consent to participate**

962 Not applicable

### 963 **Consent for publication**

964 Not applicable

965

## 966 **Availability of data and materials**

967 The datasets supporting the conclusions of this article are included within the article and its  
968 additional files.

969

## 970 **Competing interests**

971 The authors declare that they have no competing interests.

972

## 973 **Funding**

974 LB, KK, MT and LP are supported by the GINOP-2.3.2-15-2016-00001 grant of the Hungarian  
975 National Research, Development and Innovation Office (NKFIH), OC is supported by the  
976 NVKP\_16-1-2016-0005 grant of the Hungarian National Research, Development and Innovation  
977 Office (NKFIH).

978

## 979 **Contributions**

980 LP designed the project and coordinated the research; LB, and LP performed the analyses of the  
981 somatic mutation datasets of tumor tissues; MT, KK, LB, OC and LP carried out the annotation  
982 of candidate cancer genes; LP wrote the original draft. LB, MT, KK and OC reviewed and edited  
983 the manuscript. All authors read, commented, and approved the final manuscript.

984

985

## 986 **References**

- 987 1. Diederichs S, Bartsch L, Berkmann JC, Fröse K, Heitmann J, Hoppe C, Iggena D, Jazmati D,  
988 Karschnia P, Linsenmeier M, Maulhardt T, Möhrmann L, Morstein J et al. The dark matter of the  
989 cancer genome: aberrations in regulatory elements, untranslated regions, splice sites, non-coding  
990 RNA and synonymous mutations. *EMBO Mol Med.* 2016; 8:442-457.
- 991 2. Rheinbay E, Nielsen MM, Abascal F, Wala JA, Shapira O, Tiao G, Hornshøj H, Hess JM, Juul  
992 RI, Lin Z, Feuerbach L, Sabarinathan R, Madsen T. et al. PCAWG Consortium. Analyses of non-  
993 coding somatic drivers in 2,658 cancer whole genomes. *Nature.* 2020;578:102-111.
- 994 3. Heidenreich B, Rachakonda PS, Hemminki K, Kumar R. TERT promoter mutations in cancer  
995 development. *Curr Opin Genet Dev.* 2014; 24:30-37.
- 996 4. Li Y, Roberts ND, Wala JA, Shapira O, Schumacher SE, Kumar K, Khurana E, Waszak S,  
997 Korbel JO, Haber JE, Imielinski M; PCAWG Structural Variation Working Group, Weischenfeldt  
998 J, Beroukhim R, Campbell PJ; PCAWG Consortium. Patterns of somatic structural variation in  
999 human cancer genomes. *Nature.* 2020; 578:112-121.

- 1000 5. Lengauer C, Kinzler KW, Vogelstein B. Genetic instabilities in human cancers. *Nature*. 1998;  
1001 396:643-649.
- 1002 6. Cheng J, Demeulemeester J, Wedge DC, Vollan HKM, Pitt JJ, Russnes HG, Pandey BP, Nilsen  
1003 G, Nord S, Bignell GR, White KP, Børresen-Dale AL, Campbell PJ et al. Pan-cancer analysis of  
1004 homozygous deletions in primary tumours uncovers rare tumour suppressors. *Nat Commun*.  
1005 2017; 8:1221.
- 1006 7. Beroukhi R, Mermel CH, Porter D, Wei G, Raychaudhuri S, Donovan J, Barretina J, Boehm JS,  
1007 Dobson J, Urashima M, Mc Henry KT, Pinchback RM, Ligon AH et al. The landscape of somatic  
1008 copy-number alteration across human cancers. *Nature*. 2010; 463:899-905.
- 1009 8. Verhaak RGW, Bafna V, Mischel PS. Extrachromosomal oncogene amplification in tumour  
1010 pathogenesis and evolution. *Nat Rev Cancer*. 2019; 19:283-288.
- 1011 9. Haller F, Bieg M, Will R, Körner C, Weichenhan D, Bott A, Ishaque N, Lutsik P, Moskalev EA,  
1012 Mueller SK, Bähr M, Woerner A, Kaiser B et al. Enhancer hijacking activates oncogenic  
1013 transcription factor NR4A3 in acinic cell carcinomas of the salivary glands. *Nat Commun*. 2019;  
1014 10:368.
- 1015 10. Yang YA, Yu J. EZH2, an epigenetic driver of prostate cancer. *Protein Cell*. 2013; 4:331-341.
- 1016 11. Chen YC, Gotea V, Margolin G, Elnitski L. Significant associations between driver gene  
1017 mutations and DNA methylation alterations across many cancer types. *PLoS Comput Biol*. 2017;  
1018 13:e1005840.
- 1019 12. Di Domenico A, Wiedmer T, Marinoni I, Perren A. Genetic and epigenetic drivers of  
1020 neuroendocrine tumours (NET). *Endocr Relat Cancer*. 2017; 24:R315-R334.
- 1021 13. Roussel MF, Stripay JL. Epigenetic Drivers in Pediatric Medulloblastoma. *Cerebellum*. 2018;  
1022 17:28-36.

- 1023 14. Chatterjee A, Rodger EJ, Eccles MR. Epigenetic drivers of tumourigenesis and cancer metastasis.  
1024 Semin Cancer Biol. 2018; 51:149-159.
- 1025 15. Pfeifer GP. Defining Driver DNA Methylation Changes in Human Cancer. Int J Mol Sci. 2018;  
1026 19, pii: E1166.
- 1027 16. Van Tongelen A, Lorient A, De Smet C. Oncogenic roles of DNA hypomethylation through the  
1028 activation of cancer-germline genes. Cancer Lett. 2017; 396:130-137.
- 1029 17. Slack FJ, Chinnaiyan AM. The Role of Non-coding RNAs in Oncology. Cell. 2019; 179:1033-  
1030 1055.
- 1031 18. Dvinge H, Kim E, Abdel-Wahab O, Bradley RK. RNA splicing factors as oncoproteins and  
1032 tumour suppressors. Nat Rev Cancer. 2016; 16:413-430.
- 1033 19. Mofers A, Pellegrini P, Linder S, D'Arcy P. Proteasome-associated deubiquitinases and cancer.  
1034 Cancer Metastasis Rev. 2017; 36:635-653.
- 1035 20. Chen Y, Zhang Y, Guo X. Proteasome dysregulation in human cancer: implications for clinical  
1036 therapies. Cancer Metastasis Rev. 2017; 36:703-716.
- 1037 21. Voutsadakis IA. Proteasome expression and activity in cancer and cancer stem cells. Tumour  
1038 Biol. 2017; 39:1010428317692248.
- 1039 22. Ge Z, Leighton JS, Wang Y, Peng X, Chen Z, Chen H, Sun Y, Yao F, Li J, Zhang H, Liu J,  
1040 Shriver CD, Hu H et al. Integrated Genomic Analysis of the Ubiquitin Pathway across Cancer  
1041 Types. Cell Rep. 2018; 23:213-226.e3.
- 1042 23. Bernassola F, Chillemi G, Melino G. HECT-Type E3 Ubiquitin Ligases in Cancer. Trends  
1043 Biochem Sci. 2019;. pii: S0968-0004(19)30180-X.
- 1044 24. Hanahan D, Weinberg RA. Hallmarks of cancer: the next generation. Cell. 2011; 144:646-674.

- 1045 25. Maura F, Bolli N, Angelopoulos N, Dawson KJ, Leongamornlert D, Martincorena I, Mitchell TJ,  
1046 Fullam A, Gonzalez S, Szalat R, Abascal F, Rodriguez-Martin B, Samur M, et al. Genomic  
1047 landscape and chronological reconstruction of driver events in multiple myeloma. *Nat Commun.*  
1048 2019; 10:3835.
- 1049 26. Vogelstein B, Kinzler KW. The Path to Cancer - Three Strikes and You're Out. *N Engl J Med.*  
1050 2015; 373:1895-1898.
- 1051 27. Anandkrishnan R, Varghese RT, Kinney NA, Garner HR. Estimating the number of genetic  
1052 mutations (hits) required for carcinogenesis based on the distribution of somatic mutations. *PLoS*  
1053 *Comput Biol.* 2019; 15:e1006881.
- 1054 28. Campbell, P.J., Getz, G., Korbil, J.O. et al. Pan-Cancer Analysis of Whole Genomes Consortium.  
1055 Pan-cancer analysis of whole genomes. *Nature.* 2020;578:82-93.
- 1056 29. Gerstung M, Eriksson N, Lin J, Vogelstein B, Beerenwinkel N. The temporal order of genetic and  
1057 pathway alterations in tumorigenesis. *PLoS One.* 2011; 6:e27136.
- 1058 30. Bashashati A, Ha G, Tone A, Ding J, Prentice LM, Roth A, Rosner J, Shumansky K, Kalloger S,  
1059 Senz J, Yang W, McConechy M et al. Distinct evolutionary trajectories of primary high-grade  
1060 serous ovarian cancers revealed through spatial mutational profiling. *J Pathol.* 2013; 231:21-34.
- 1061 31. Shain AH, Yeh I, Kovalyshyn I, Sriharan A, Talevich E, Gagnon A, Dummer R, North J, Pincus  
1062 L, Ruben B, Rickaby W, D'Arrigo C, Robson A. et al.. The Genetic Evolution of Melanoma from  
1063 Precursor Lesions. *N Engl J Med.* 2015; 373:1926-1936.
- 1064 32. Gerstung M, Jolly C, Leshchiner I, Dentro SC, Gonzalez S, Rosebrock D, Mitchell TJ, Rubanova  
1065 Y, Anur P, Yu K, Tarabichi M, Deshwar A, Wintersinger J. et al.; PCAWG Evolution &  
1066 Heterogeneity Working Group, Spellman PT, Wedge DC, Van Loo P; PCAWG Consortium. The  
1067 evolutionary history of 2,658 cancers. *Nature.* 2020;578:122-128.

- 1068 33. Parmigiani G, Boca S, Lin J, Kinzler KW, Velculescu V, Vogelstein B. Design and analysis  
1069 issues in genome-wide somatic mutation studies of cancer. *Genomics*. 2009; 93:17-21.
- 1070 34. Meyerson M, Gabriel S, Getz G. Advances in understanding cancer genomes through second-  
1071 generation sequencing. *Nat Rev Genet*. 2010; 11:685-696.
- 1072 35. Michaelson JJ, Shi Y, Gujral M, Zheng H, Malhotra D, Jin X, Jian M, Liu G, Greer D, Bhandari  
1073 A, Wu W, Corominas R, Peoples A, et al. Whole-genome sequencing in autism identifies hot  
1074 spots for de novo germline mutation. *Cell*. 2012; 151:1431-1442.
- 1075 36. Rogozin IB, Pavlov YI. Theoretical analysis of mutation hotspots and their DNA sequence  
1076 context specificity. *Mutat Res*. 2003; 544:65-85.
- 1077 37. Carter H. Mutation hotspots may not be drug targets. *Science*. 2019; 364:1228-1229.
- 1078 38. Buisson R, Langenbucher A, Bowen D, Kwan EE, Benes CH, Zou L, Lawrence MS. Passenger  
1079 hotspot mutations in cancer driven by APOBEC3A and mesoscale genomic features. *Science*.  
1080 2019; 364pii: eaaw2872.
- 1081 39. Poulos RC, Wong YT, Ryan R, Pang H, Wong JWH. Analysis of 7,815 cancer exomes reveals  
1082 associations between mutational processes and somatic driver mutations. *PLoS Genet*. 2018;  
1083 14:e1007779.
- 1084 40. Schuster-Böckler B, Lehner B. Chromatin organization is a major influence on regional mutation  
1085 rates in human cancer cells. *Nature*. 2012; 488:504-507.
- 1086 41. Gonzalez-Perez A, Sabarinathan R, Lopez-Bigas N. Local Determinants of the Mutational  
1087 Landscape of the Human Genome. *Cell*. 2019; 177:101-114.



- 1088 42. Polak P, Karlić R, Koren A, Thurman R, Sandstrom R, Lawrence M, Reynolds A, Rynes E,  
1089 Vlahoviček K, Stamatoyannopoulos JA, Sunyaev SR. Cell-of-origin chromatin organization  
1090 shapes the mutational landscape of cancer. *Nature*. 2015; 518:360-364.
- 1091 43. Salvadores M, Mas-Ponte D, Supek F. Passenger mutations accurately classify human tumors.  
1092 *PLoS Comput Biol*. 2019; 15:e1006953.
- 1093 44. Lawrence MS, Stojanov P, Polak P, Kryukov GV, Cibulskis K, Sivachenko A, Carter SL, Stewart  
1094 C, Mermel CH, Roberts SA, Kiezun A, Hammerman PS, McKenna A et al. Mutational  
1095 heterogeneity in cancer and the search for new cancer-associated genes. *Nature*. 2013; 499:214-  
1096 218.
- 1097 45. Lawrence MS, Stojanov P, Mermel CH, Robinson JT, Garraway LA, Golub TR, Meyerson M,  
1098 Gabriel SB, Lander ES, Getz G. Discovery and saturation analysis of cancer genes across 21  
1099 tumour types. *Nature*. 2014; 505:495-501.
- 1100 46. Kaminker JS, Zhang Y, Watanabe C, Zhang Z. CanPredict: a computational tool for predicting  
1101 cancer-associated missense mutations. *Nucleic Acids Res*. 2007; 35(Web Server issue):W595-  
1102 598.
- 1103 47. Carter H, Chen S, Isik L, Tyekuceva S, Velculescu VE, Kinzler KW, Vogelstein B, Karchin R.  
1104 Cancer-specific high-throughput annotation of somatic mutations: computational prediction of  
1105 driver missense mutations. *Cancer Res*. 2009; 69:6660-6667.
- 1106 48. Nussinov R, Jang H, Tsai CJ, Cheng F. Precision medicine and driver mutations: Computational  
1107 methods, functional assays and conformational principles for interpreting cancer drivers. *PLoS*  
1108 *Comput Biol*. 2019; 15:e1006658.
- 1109 49. Youn A, Simon R. Identifying cancer driver genes in tumor genome sequencing studies.  
1110 *Bioinformatics*. 2011; 27:175-181.

- 1111 50. Zhou Z, Zou Y, Liu G, Zhou J, Wu J, Zhao S, Su Z, Gu X. Mutation-profile-based methods for  
1112 understanding selection forces in cancer somatic mutations: a comparative analysis. *Oncotarget*.  
1113 2017; 8:58835-58846.
- 1114 51. Supek F, Miñana B, Valcárcel J, Gabaldón T, Lehner B. Synonymous mutations frequently act as  
1115 driver mutations in human cancers. *Cell*. 2014; 156:1324-1335.
- 1116 52. Hurst LD, Batada NN. Depletion of somatic mutations in splicing-associated sequences in cancer  
1117 genomes. *Genome Biol*. 2017; 18:213.
- 1118 53. Sharma Y, Miladi M, Dukare S, Boulay K, Caudron-Herger M, Groß M, Backofen R, Diederichs  
1119 S. A pan-cancer analysis of synonymous mutations. *Nat Commun*. 2019; 10:2569.
- 1120 54. Vogelstein B, Papadopoulos N, Velculescu VE, Zhou S, Diaz LA Jr, Kinzler KW. Cancer  
1121 genome landscapes. *Science*. 2013; 339:1546-1558.
- 1122 55. Tamborero D, Gonzalez-Perez A, Perez-Llamas C, Deu-Pons J, Kandath C, Reimand J, Lawrence  
1123 MS, Getz G, Bader GD, Ding L, Lopez-Bigas N. Comprehensive identification of mutational  
1124 cancer driver genes across 12 tumor types. *Sci Rep*. 2013; 3:2650.
- 1125 56. Bailey MH, Tokheim C, Porta-Pardo E, Sengupta S, Bertrand D, Weerasinghe A, Colaprico A,  
1126 Wendl MC, Kim J, Reardon B, Kwok-Shing Ng P, Jeong KJ, Cao S et al. Comprehensive  
1127 Characterization of Cancer Driver Genes and Mutations. *Cell*. 2018; 174:1034-1035.
- 1128 57. Zhao S, Liu J, Nanga P, Liu Y, Cicek AE, Knoblauch N, He C, Stephens M, He X. Detailed  
1129 modeling of positive selection improves detection of cancer driver genes. *Nat Commun*. 2019;  
1130 10:3399.
- 1131 58. Tate JG, Bamford S, Jubb HC, Sondka Z, Beare DM, Bindal N, Boutselakis H, Cole CG,  
1132 Creatore C, Dawson E, Fish P, Harsha B, Hathaway C, et al. COSMIC: the Catalogue Of Somatic  
1133 Mutations In Cancer. *Nucleic Acids Res*. 2019; 47:D941-D947.

- 1134 59. Sondka Z, Bamford S, Cole CG, Ward SA, Dunham I, Forbes SA. The COSMIC Cancer Gene  
1135 Census: describing genetic dysfunction across all human cancers. *Nat Rev Cancer*. 2018; 18:696-  
1136 705.
- 1137 60. Torrente A, Lukk M, Xue V, Parkinson H, Rung J, Brazma A. Identification of Cancer Related  
1138 Genes Using a Comprehensive Map of Human Gene Expression. *PLoS One*. 2016; 11:e0157484.
- 1139 61. Calabrese C, Davidson NR, Demircioğlu D, Fonseca NA, He Y, Kahles A, Lehmann KV, Liu F,  
1140 Shiraishi Y, Soulette CM, Urban L, Greger L, Li S. et al. PCAWG Consortium. Genomic basis  
1141 for RNA alterations in cancer. *Nature*. 2020;578:129-136.
- 1142 62. Abbott KL, Nyre ET, Abrahante J, Ho YY, Isaksson Vogel R, Starr TK. The Candidate Cancer  
1143 Gene Database: a database of cancer driver genes from forward genetic screens in mice. *Nucleic  
1144 Acids Res*. 2015; 43:D844-848.
- 1145 63. Futreal PA, Coin L, Marshall M, Down T, Hubbard T, Wooster R, Rahman N, Stratton MR. A  
1146 census of human cancer genes. *Nat Rev Cancer*. 2004; 4:177-183.
- 1147 64. Patthy, L. (1999) *Protein Evolution*, 2nd ed.; Blackwell Publishing Ltd.
- 1148 65. Weghorn D, Sunyaev S. Bayesian inference of negative and positive selection in human cancers.  
1149 *Nat Genet*. 2017; 49:1785-1788.
- 1150 66. Wang T, Birsoy K, Hughes NW, Krupczak KM, Post Y, Wei JJ, Lander ES, Sabatini DM.  
1151 Identification and characterization of essential genes in the human genome. *Science*. 2015;  
1152 350:1096-1101.
- 1153 67. Martincorena I, Raine KM, Gerstung M, Dawson KJ, Haase K, Van Loo P, Davies H, Stratton  
1154 MR, Campbell PJ. Universal Patterns of Selection in Cancer and Somatic Tissues. *Cell*. 2017;  
1155 171:1029-1041.e21.

- 1156 68. Bakhoum SF, Landau DA. Cancer Evolution: No Room for Negative Selection. *Cell*. 2017;  
1157 171:987-989.
- 1158 69. Koch L. Cancer genomics: The driving force of cancer evolution. *Nat Rev Genet*. 2017; 18:703.
- 1159 70. Vitale I, Galluzzi L. Everybody In! No Bouncers at Tumor Gates. *Trends Genet*. 2018; 34:85-87.
- 1160 71. De Kegel B, Ryan CJ. Paralog buffering contributes to the variable essentiality of genes in cancer  
1161 cell lines. *PLoS Genet*. 2019;15:e1008466.
- 1162 72. Ganapathy V, Thangaraju M, Prasad PD. Nutrient transporters in cancer: relevance to Warburg  
1163 hypothesis and beyond. *Pharmacol Ther*. 2009; 121:29-40.
- 1164 73. Warburg O. On respiratory impairment in cancer cells. *Science*. 1956; 124:269-270.
- 1165 74. Warburg O. On the origin of cancer cells. *Science*. 1956; 123:309-314.
- 1166 75. Jones RG, Thompson C.B. Tumor suppressors and cell metabolism: a recipe for cancer growth.  
1167 *Genes Dev*.2009; 23:537-548.
- 1168 76. DeBerardinis RJ, Lum JJ, Hatzivassiliou G, Thompson CB. The biology of cancer: Metabolic  
1169 reprogramming fuels cell growth and proliferation.*Cell Metab*. 2008; 7:11-20.
- 1170 77. Hsu P.P, Sabatini D.M. Cancer cell metabolism: Warburg and beyond. *Cell*.2008; 134:703-707.
- 1171 78. Semenza GL. HIF-1: upstream and downstream of cancer metabolism. *Curr. Opin. Genet.*  
1172 *Dev*.2010; 20:51-56.
- 1173 79. Semenza GL. Defining the role of hypoxia-inducible factor 1 in cancer biology and therapeutics.  
1174 *Oncogene*.2010; 29:625-634.
- 1175 80. Kroemer G, Pouyssegur J. Tumor cell metabolism: Cancer's Achilles' heel. *Cancer Cell*.2008;  
1176 13:472-482.

- 1177 81. Wang J, Ye C, Chen C, Xiong H, Xie B, Zhou J, Chen Y, Zheng S, Wang L. Glucose transporter  
1178 GLUT1 expression and clinical outcome in solid tumors: a systematic review and meta-analysis.  
1179 *Oncotarget*. 2017; 8:16875-16886.
- 1180 82. Deng Y, Zou J, Deng T, Liu J. Clinicopathological and prognostic significance of GLUT1 in  
1181 breast cancer: A meta-analysis. *Medicine (Baltimore)*. 2018; 97:e12961.
- 1182 83. de Castro TB, Mota AL, Bordin-Junior NA, Neto DS, Zuccari DAPC. Immunohistochemical  
1183 Expression of Melatonin Receptor MT1 and Glucose Transporter GLUT1 in Human Breast  
1184 Cancer. *Anticancer Agents Med Chem*. 2018; 18:2110-2116.
- 1185 84. Wellberg EA, Johnson S, Finlay-Schultz J, Lewis AS, Terrell KL, Sartorius CA, Abel ED, Muller  
1186 WJ, Anderson SM. The glucose transporter GLUT1 is required for ErbB2-induced mammary  
1187 tumorigenesis. *Breast Cancer Res*. 2016; 18:131.
- 1188 85. Xiao H, Wang J, Yan W, Cui Y, Chen Z, Gao X, Wen X, Chen J. GLUT1 regulates cell  
1189 glycolysis and proliferation in prostate cancer. *Prostate*. 2018; 78:86-94.
- 1190 86. Shibuya K, Okada M, Suzuki S, Seino M, Seino S, Takeda H, Kitanaka C. Targeting the  
1191 facilitative glucose transporter GLUT1 inhibits the self-renewal and tumor-initiating capacity of  
1192 cancer stem cells. *Oncotarget*. 2015; 6:651-661.
- 1193 87. Noguchi C, Kamitori K, Hossain A, Hoshikawa H, Katagi A, Dong Y, Sui L, Tokuda M,  
1194 Yamaguchi F. D-Allose Inhibits Cancer Cell Growth by Reducing GLUT1 Expression. *Tohoku J*  
1195 *Exp Med*. 2016; 238:131-141.
- 1196 88. Chen Q, Meng YQ, Xu XF, Gu J. Blockade of GLUT1 by WZB117 resensitizes breast cancer  
1197 cells to adriamycin. *Anticancer Drugs*. 2017; 28:880-887.
- 1198 89. Lin C, Xu X. YAP1-TEAD1-Glut1 axis dictates the oncogenic phenotypes of breast cancer cells  
1199 by modulating glycolysis. *Biomed Pharmacother*. 2017; 95:789-794.

- 1200 90. Goldman NA, Katz EB, Glenn AS, Weldon RH, Jones JG, Lynch U, Fezzari MJ, Runowicz CD,  
1201 Goldberg GL, Charron MJ. GLUT1 and GLUT8 in endometrium and endometrial  
1202 adenocarcinoma. *Mod Pathol.* 2006; 19:1429-1436.
- 1203 91. McBrayer SK, Cheng JC, Singhal S, Krett NL, Rosen ST, Shanmugam M. Multiple myeloma  
1204 exhibits novel dependence on GLUT4, GLUT8, and GLUT11: implications for glucose  
1205 transporter-directed therapy. *Blood.* 2012; 119:4686-4697.
- 1206 92. Mathupala SP, Colen CB, Parajuli P, Sloan AE. Lactate and malignant tumors: a therapeutic  
1207 target at the end stage of glycolysis (Review). *J Bioenerg Biomembr.* 2007; 39:73-77.
- 1208 93. Andersen AP, Samsøe-Petersen J, Oernbo EK, Boedtkjer E, Moreira JMA, Kveiborg M, Pedersen  
1209 SF. The net acid extruders NHE1, NBCn1 and MCT4 promote mammary tumor growth through  
1210 distinct but overlapping mechanisms. *Int J Cancer.* 2018; 142:2529-2542.
- 1211 94. Baenke F, Dubuis S, Brault C, Weigelt B, Dankworth B, Griffiths B, Jiang M, Mackay A,  
1212 Saunders B, Spencer-Dene B, Ros S, Stamp G, Reis-Filho JS et al. Functional screening identifies  
1213 MCT4 as a key regulator of breast cancer cell metabolism and survival. *J Pathol.* 2015; 237:152-  
1214 165.
- 1215 95. Witkiewicz AK, Whitaker-Menezes D, Dasgupta A, Philp NJ, Lin Z, Gandara R, Sneddon S,  
1216 Martinez-Outschoorn UE, Sotgia F, Lisanti MP. Using the "reverse Warburg effect" to identify  
1217 high-risk breast cancer patients: stromal MCT4 predicts poor clinical outcome in triple-negative  
1218 breast cancers. *Cell Cycle.* 2012; 11:1108-1117.
- 1219 96. Doyen J, Trastour C, Ettore F, Peyrottes I, Toussant N, Gal J, Ilc K, Roux D, Parks SK, Ferrero  
1220 JM, Pouysségur J. Expression of the hypoxia-inducible monocarboxylate transporter MCT4 is  
1221 increased in triple negative breast cancer and correlates independently with clinical outcome.  
1222 *Biochem Biophys Res Commun.* 2014; 451:54-61.

- 1223 97. Baek G, Tse YF, Hu Z, Cox D, Buboltz N, McCue P, Yeo CJ, White MA, DeBerardinis RJ,  
1224 Knudsen ES, Witkiewicz AK. MCT4 defines a glycolytic subtype of pancreatic cancer with poor  
1225 prognosis and unique metabolic dependencies. *Cell Rep.* 2014; 9:2233-2249.
- 1226 98. Choi SY, Xue H, Wu R, Fazli L, Lin D, Collins CC, Gleave ME, Gout PW, Wang Y. The MCT4  
1227 Gene: A Novel, Potential Target for Therapy of Advanced Prostate Cancer. *Clin Cancer Res.*  
1228 2016; 22:2721-2733.
- 1229 99. Todenhöfer T, Seiler R, Stewart C, Moskalev I, Gao J, Ladhar S, Kamjabi A, Al Nakouzi N,  
1230 Hayashi T, Choi S, Wang Y, Frees S, Daugaard M. et al. Selective Inhibition of the Lactate  
1231 Transporter MCT4 Reduces Growth of Invasive Bladder Cancer. *Mol Cancer Ther.* 2018;  
1232 17:2746-2755.
- 1233 100. Choi SYC, Ettinger SL, Lin D, Xue H, Ci X, Nabavi N, Bell RH, Mo F, Gout PW,  
1234 Fleshner NE, Gleave ME, Collins CC, Wang Y. Targeting MCT4 to reduce lactic acid secretion  
1235 and glycolysis for treatment of neuroendocrine prostate cancer. *Cancer Med.* 2018 7:3385–3392.
- 1236 101. Zhao Y, Li W, Li M, Hu Y, Zhang H, Song G, Yang L, Cai K, Luo Z. Targeted inhibition  
1237 of MCT4 disrupts intracellular pH homeostasis and confers self-regulated apoptosis on  
1238 hepatocellular carcinoma. *Exp Cell Res.* 2019:111591.
- 1239 102. Li XX, Zheng HT, Huang LY, Shi DB, Peng JJ, Liang L, Cai SJ. Silencing of CXCR7  
1240 gene represses growth and invasion and induces apoptosis in colorectal cancer through ERK and  
1241  $\beta$ -arrestin pathways. *Int J Oncol.* 2014; 45:1649-5167.
- 1242 103. Stacer AC, Fenner J, Cavnar SP, Xiao A, Zhao S, Chang SL, Salomonson A, Luker KE,  
1243 Luker GD. Endothelial CXCR7 regulates breast cancer metastasis. *Oncogene.* 2016; 35:1716-  
1244 1724.

- 1245 104. Zhao ZW, Fan XX, Song JJ, Xu M, Chen MJ, Tu JF, Wu FZ, Zhang DK, Liu L, Chen L,  
1246 Ying XH, Ji JS. ShRNA knock-down of CXCR7 inhibits tumour invasion and metastasis in  
1247 hepatocellular carcinoma after transcatheter arterial chemoembolization. *J Cell Mol Med.* 2017;  
1248 21:1989-1999.
- 1249 105. Puddinu V, Casella S, Radice E, Thelen S, Dirnhofer S, Bertoni F, Thelen M. ACKR3  
1250 expression on diffuse large B cell lymphoma is required for tumor spreading and tissue  
1251 infiltration. *Oncotarget.* 2017; 8:85068-85084.
- 1252 106. Melo RCC, Ferro KPV, Duarte ADSS, Olalla Saad ST. CXCR7 participates in CXCL12-  
1253 mediated migration and homing of leukemic and normal hematopoietic cells. *Stem Cell Res Ther.*  
1254 2018; 9:34.
- 1255 107. Qian T, Liu Y, Dong Y, Zhang L, Dong Y, Sun Y, Sun D. CXCR7 regulates breast tumor  
1256 metastasis and angiogenesis in vivo and in vitro. *Mol Med Rep.* 2018; 17:3633-3639.
- 1257 108. EDITORIAL. The era of massive cancer sequencing projects has reached a turning point.  
1258 The future of cancer genomics lies in the clinic. *Nature.* 2000; 578, 7-8 .
- 1259
- 1260
- 1261
- 1262
- 1263
- 1264



1265 **FIGURES**

1266

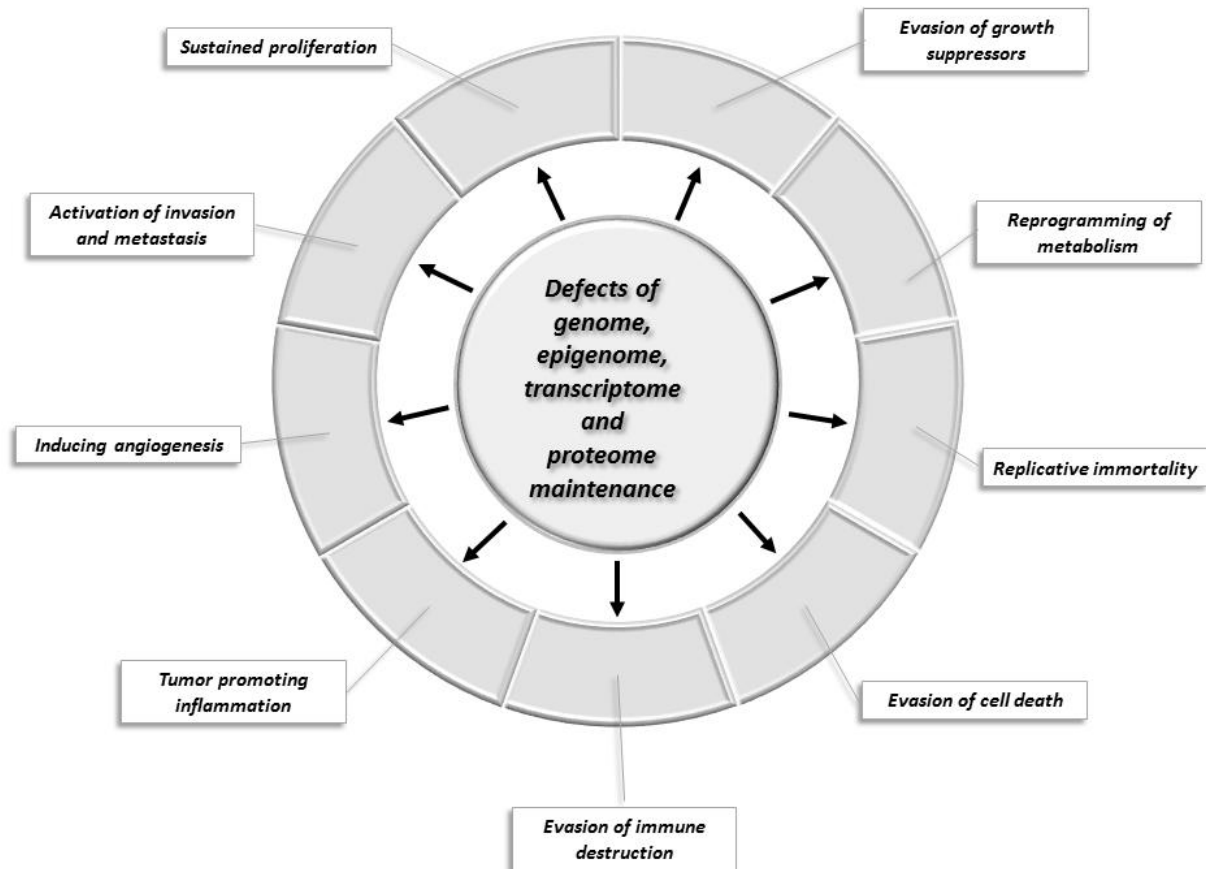

1267

1268

1269 **Figure 1. Changes of key cellular processes contributing to carcinogenesis.**

1270 The central circle refers to processes involved in the maintenance of the integrity of the genome,

1271 epigenome, transcriptome and proteome: defects in these processes increase the chance that

1272 genes and proteins of other cellular pathways (represented by segments of the outer circle) will

1273 suffer alterations that favor the acquisition of capabilities that permit the proliferation, survival

1274 and metastasis of tumor cells.

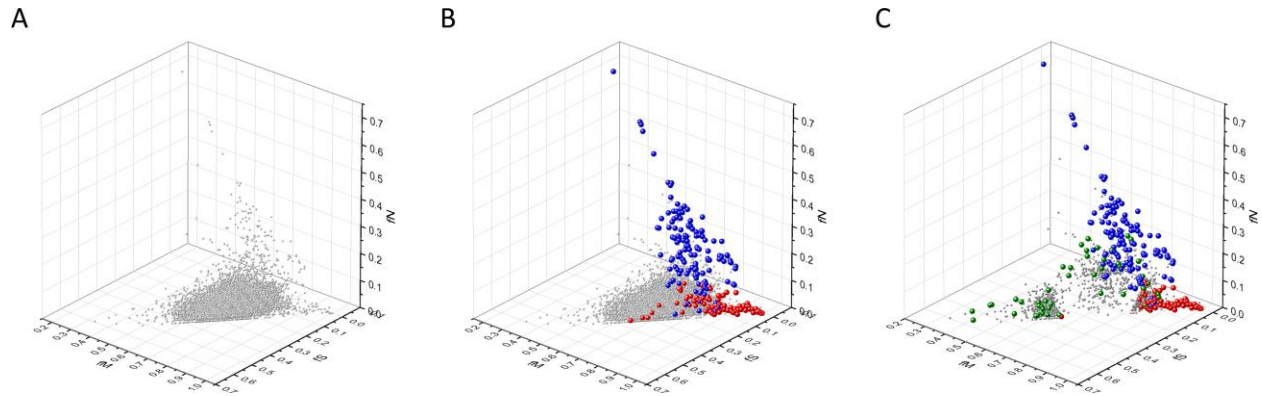

1275

1276

1277 **Figure 2. Analyses of fS, fM and fN parameters of human protein-coding genes of tumor**

1278 **tissues.** The figure shows the results of the analysis of 13803 transcripts containing at least 100

1279 subtle, confirmed somatic mutations from tumor tissues, including only mutations identified as

1280 not SNPs. Axes  $x$ ,  $y$  and  $z$  represent the fractions of somatic single nucleotide substitutions that

1281 are assigned to the synonymous (fS), nonsynonymous (fM) and nonsense (fN) categories,

1282 respectively. In **Panel A** each gray ball represents a human transcript; note that the majority of

1283 human genes are present in a dense cluster. **Panel B** highlights the positions of transcripts of the

1284 genes identified by Vogelstein *et al.*, (2013) as oncogenes (OGs, large red balls) or tumor

1285 suppressor genes (TSGs, large blue balls). It is noteworthy that these driver genes separate

1286 significantly from the central cluster and from each other: OGs have a significantly larger

1287 fraction of nonsynonymous, whereas TSGs have significantly larger fraction of nonsense

1288 substitutions. **Panel C** shows data only for candidate cancer genes present in the

1289 CG\_SO<sup>2SD</sup>\_SSI<sup>2SD</sup> list (see **Supplementary Table 6**). The positions of transcripts of the genes

1290 identified by Vogelstein *et al.*, (2013) as oncogenes (OGs, large red balls) or tumor suppressor

1291 genes (TSGs, large blue balls) are highlighted. The positions of novel cancer gene transcripts

1292 validated in the present work are highlighted as large green balls.

A1

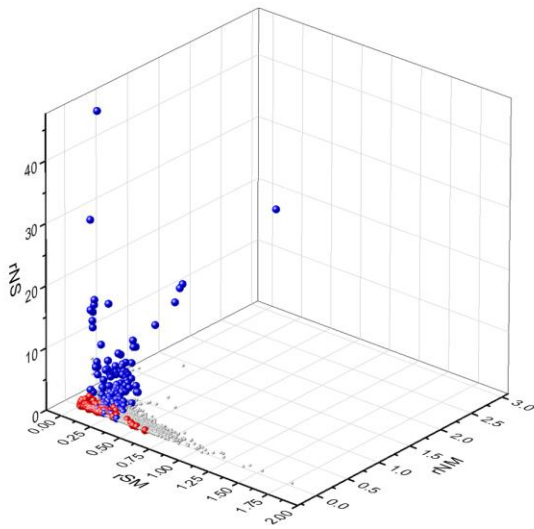

A2

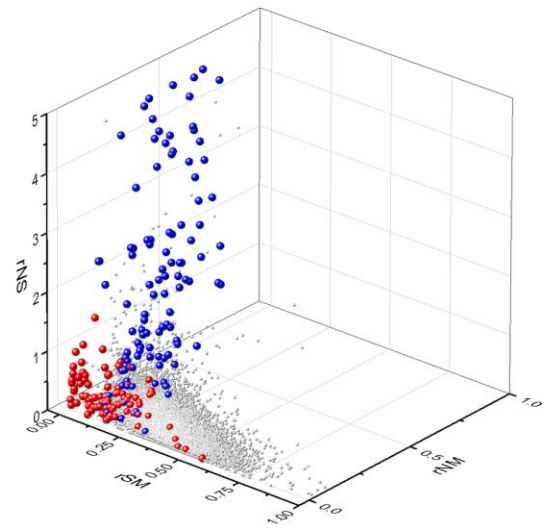

B1

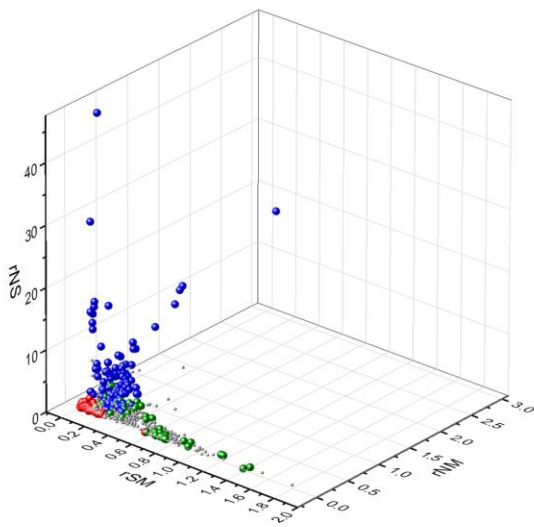

B2

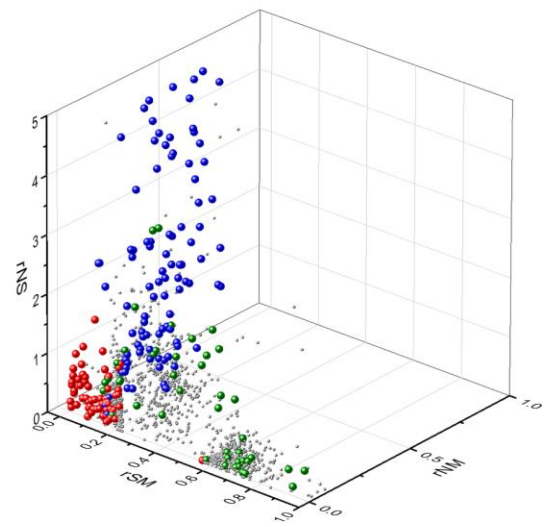

1293

1294

1295 **Figure 3. Analyses of rSM, rNM, rNS parameters of human protein-coding genes of tumor**

1296 **tissues.** The figure shows the results of the analysis of 13803 transcripts containing at least 100

1297 subtle, confirmed somatic mutations from tumor tissues, including only mutations identified as

1298 not SNPs. Axes  $x$ ,  $y$  and  $z$  represent the rSM, rNM, rNS values defined as the ratio of fS/fM,

1299 fN/fM, fN/fS, respectively. Each ball represents a human transcript; the positions of transcripts

1300 of the genes identified by Vogelstein *et al.*, (2013) as oncogenes (OGs, large red balls) or tumor  
1301 suppressor genes (TSGs, large blue balls) are highlighted. **Panels A1, A2** show the distribution  
1302 of the 13803 transcripts at different magnification. Note that the majority of human genes are  
1303 present in a dense cluster but known OGs and TSGs separate significantly from the central  
1304 cluster and from each other. The rNS and rNM values of TSGs are higher, whereas the rSM and  
1305 rNM values of OGs are lower than those of passenger genes. **Panels B1, B2** show data only for  
1306 candidate cancer genes present in the CG\_SO<sup>2SD</sup>\_SSI<sup>2SD</sup> list (see **Supplementary Tables 6**). The  
1307 positions of transcripts of the genes identified by Vogelstein *et al.*, (2013) as oncogenes (OGs,  
1308 large red balls) or tumor suppressor genes (TSGs, large blue balls) are highlighted. The positions  
1309 of novel cancer gene transcripts validated in the present work are highlighted as large green  
1310 balls.

1311

1312

1313

A1

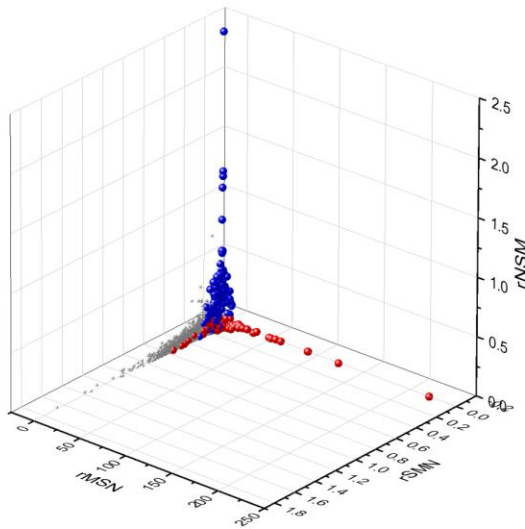

A2

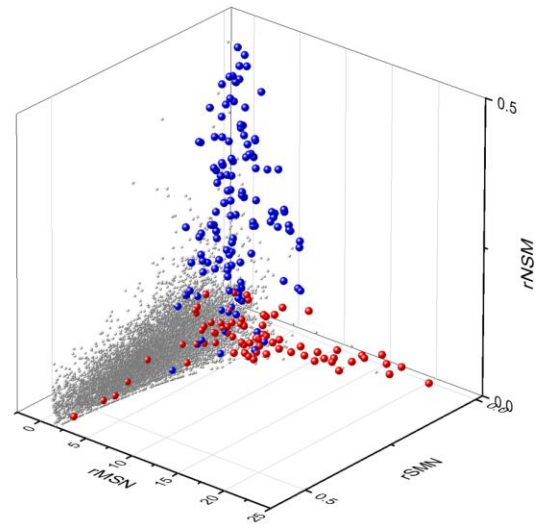

B1

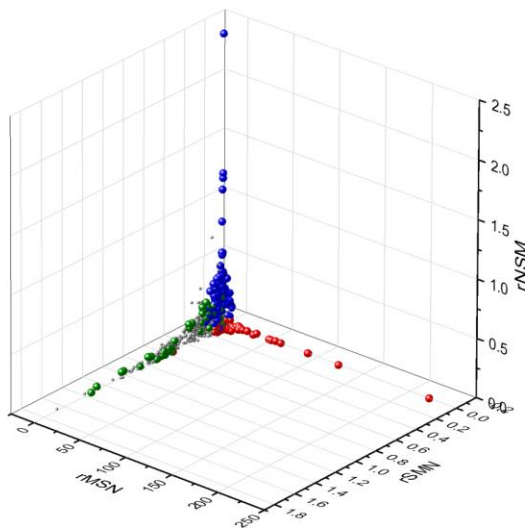

B2

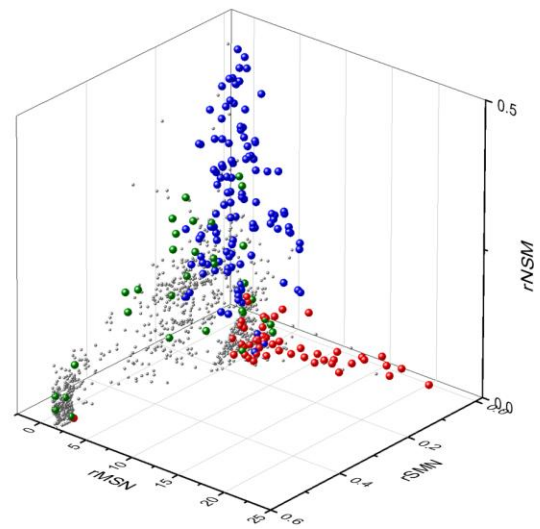

1314

1315

1316 **Figure 4. Analyses of rSMN, rMSN and rNSM parameters of human protein-coding genes**

1317 **of tumor tissues.** The figure shows the results of the analysis of transcripts containing at least

1318 100 subtle, confirmed somatic mutations from tumor tissues, including only mutations identified

1319 as not SNPs. Axes  $x$ ,  $y$  and  $z$  represent the rSMN, rMSN and rNSM defined as the ratio of

1320  $fS/(fM+fN)$ ,  $fM/(fS+fN)$  and  $fN/(fS+fM)$ . Each ball represents a human transcript; the positions

1321 of transcripts of the genes identified by Vogelstein *et al.*, (2013) as oncogenes (OGs, large red  
1322 balls) or tumor suppressor genes (TSGs, large blue balls) are highlighted. **Panels A1, A2** show  
1323 the distribution of the 13803 transcripts at different magnification. Note that the majority of  
1324 human genes are present in a dense cluster but known OGs and TSGs separate significantly from  
1325 the central cluster and from each other. The rNSM values of TSGs are higher, their rMSN and  
1326 rSMN are lower than those of passenger genes. OGs also separate from passenger genes in that  
1327 their rMSN values are higher and their rSMN and rNSM values are lower than those of  
1328 passenger genes. **Panels B1, B2** show data only for candidate cancer genes present in the  
1329 CG\_SO<sup>2SD</sup>\_SSI<sup>2SD</sup> list (see **Supplementary Table 6**). The positions of transcripts of the genes  
1330 identified by Vogelstein *et al.*, (2013) as oncogenes (OGs, large red balls) or tumor suppressor  
1331 genes (TSGs, large blue balls) are highlighted. The positions of novel cancer gene transcripts  
1332 validated in the present work are highlighted as large green balls.  
1333

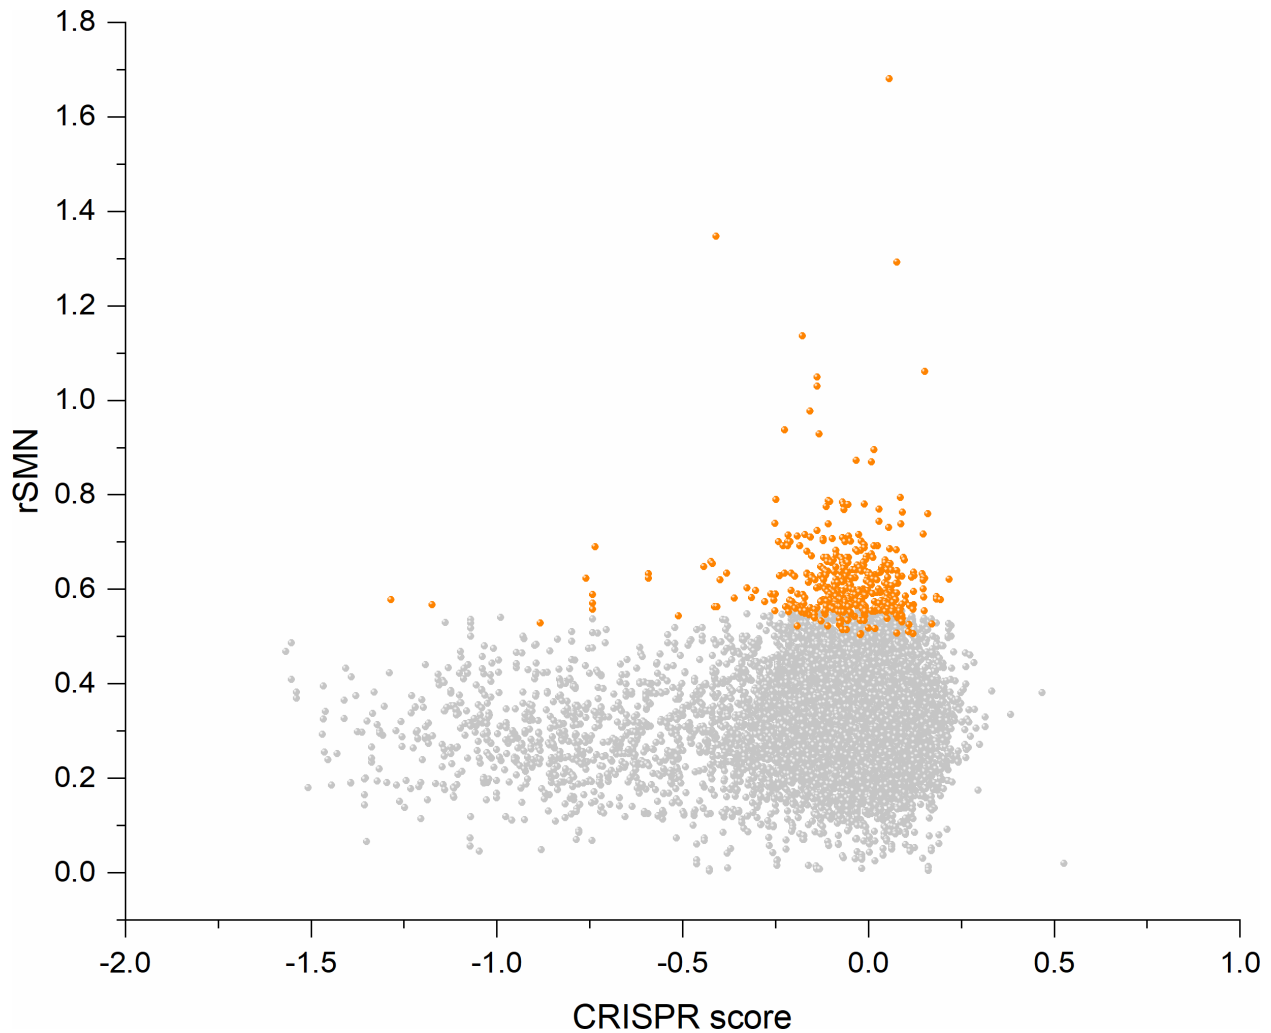

1334

1335

1336 **Figure 5. Lack of correlation between cell-essentiality scores of human genes and negative**

1337 **selection during tumor evolution.** The figure shows the results of the analysis of transcripts

1338 containing at least 100 subtle, confirmed somatic, non polymorphic mutations from tumor

1339 tissues. The abscissa indicates the cell-essentiality score of the genes, the ordinate shows the

1340 rSMN parameters of the transcripts. Each ball represents a human transcript. Transcripts showing

1341 strongest signals of negatively selection ( $CG\_SO^{2SD}$  rSMN>0.5) are represented by dark orange

1342 balls.

1343

1344 **Table 1**

1345  
1346

1347 **Assignment of novel positively or negatively selected cancer genes to key**  
1348 **cellular processes of carcinogenesis**

1349  
1350

1351 **Hallmarks of cancer**

**Gene symbol**

1352  
1353

1354 Defects of genome, epigenome,  
1355 transcriptome or proteome maintenance

*CDK8, FOXG1, IDH3B, MARCH7, MGA, NOVA1,  
PNCK, RNF128, TGIF1, TNRC6B, TWIST1, ZC3H13,  
ZFP36L1, ZFP36L2, ZNF750*

1357  
1358

1359 Sustained proliferation

*AURKA, BRD7, ING1, FOXG1, MAPK13, PNCK,  
PRRT2, RASA1, RIT1, SPRED1, TRIB2, TTK, YAP1,  
YES1, ZFP36L1, ZFP36L2, ZNF750*

1362  
1363

1364 Evasion of growth suppressors

1365  
1366

1367 Reprogramming of metabolism

*BRD7, G6PD, SLC16A1, SLC16A3, SLC2A1, SLC2A8,  
YAP1, YES1*

1369  
1370

1371 Replicative immortality

*NOVA1*

1372  
1373

1374 Evasion of cell death

*BRD7, ING1, MAPK13, PNCK, PRRT2, TP73, TRIB2,  
TTK, YAP1, YES1, ZNF750*

1376  
1377

1378 Evasion of immune destruction

1379  
1380

1381 Tumor promoting inflammation

*BMP2R, CCR2, CCR5, CX3CR1, MAPK13*

1382  
1383

1384 Inducing angiogenesis

*CCR2*

1385  
1386

1387 Activation of invasion and metastasis

*CCR2, CCR5, CX3CR1, RASA1, TBXA2R*

1388  
1389

1390 For annotation of novel genes identified in the present study see Additional file 2. The names of  
1391 negatively selected genes are marked by bold underline.

1392



## 1393 **Supplementary information**

### 1394 **Additional file 1**

1395 The file describes SSI analyses (Substitutions and Subtle Indels analyses) of silent, amino  
1396 acid changing and truncating somatic mutations of human protein-coding genes of tumor tissues.

1397 In SSI analyses subtle mutations affecting the coding sequences of protein coding genes  
1398 were assigned to three categories: S, silent synonymous substitutions, M, merging  
1399 nonsynonymous substitutions and short inframe indels that change but do not disrupt coding  
1400 sequences, and N, merging nonsense substitutions and short frame-shift indels as both types of  
1401 mutations lead eventually to stop codons that truncate the proteins.

### 1402 **Additional file 2**

1403 The file contains description of selected genes identified in the present study displaying  
1404 strong signatures of positive and/or negative selection and which are novel in the sense that they  
1405 are not included in the most widely used cancer gene lists (Vogelstein *et al.* 2013; Sondka *et al.*,  
1406 2018).

1407 **Additional file 3. Supplementary Table 1.** Statistics of transcripts and subtle somatic mutations  
1408 of human protein coding genes of the different datasets analyzed.

1409 **Additional file 4. Supplementary Table 2.** SO (Substitution Only) and SSI (Substitutions and  
1410 Subtle Indel) analyses of somatic mutations of transcripts of human protein coding genes.  
1411 Transcripts of OGs (oncogenes) and TSGs (tumor suppressor genes) of the cancer gene list of  
1412 Vogelstein *et al.* (2013) are highlighted by brick red and blue backgrounds, respectively.  
1413 Transcripts of CGC (Cancer Gene Census) genes (Sondka *et al.*, 2018) that do not correspond to  
1414 OGs or TSGs of the cancer gene list of Vogelstein *et al.* (2013) are highlighted by yellow  
1415 background.

1416 **Additional file 5. Supplementary Table 3.** SO (Substitution Only) and SSI (Substitutions and  
1417 Subtle Indel) analyses of somatic mutations of transcripts of human protein coding genes that  
1418 have at least 100 confirmed somatic, non polymorphic mutations identified in tumor tissues. The  
1419 table also contains lists of genes ( $PG\_SO^{f\_1SD}$ ,  $PG\_SO^{r2\_1SD}$ ,  $PG\_SO^{r3\_1SD}$ ,  $PG\_SSI^{f\_1SD}$ ,  
1420  $PG\_SSI^{r2\_1SD}$ ,  $PG\_SSI^{r3\_1SD}$ ) whose parameters deviate from the mean values by  $\leq 1SD$  as well as  
1421 lists of genes ( $CG\_SO^{f\_1SD}$ ,  $CG\_SO^{r2\_1SD}$ ,  $CG\_SO^{r3\_1SD}$ ,  $CG\_SSI^{f\_1SD}$ ,  $CG\_SSI^{r2\_1SD}$ ,  
1422  $CG\_SSI^{r3\_1SD}$ ) whose parameters deviate from the mean values by  $> 1SD$ . Table also contains  
1423 lists of genes ( $CG\_SO^{f\_2SD}$ ,  $CG\_SO^{r2\_2SD}$ ,  $CG\_SO^{r3\_2SD}$ ,  $CG\_SSI^{f\_2SD}$ ,  $CG\_SSI^{r2\_2SD}$ ,  
1424  $CG\_SSI^{r3\_2SD}$ ) whose parameters deviate from the mean values by  $> 2SD$  as well as lists of genes  
1425 ( $PG\_SO^{f\_2SD}$ ,  $PG\_SO^{r2\_2SD}$ ,  $PG\_SO^{r3\_2SD}$ ,  $PG\_SSI^{f\_2SD}$ ,  $PG\_SSI^{r2\_2SD}$ ,  $PG\_SSI^{r3\_2SD}$ ) whose  
1426 parameters deviate from the mean values by  $< 2SD$ . Transcripts of OGs (oncogenes) and TSGs  
1427 (tumor suppressor genes) of the cancer gene list of Vogelstein *et al.* (2013) are highlighted by  
1428 brick red and blue backgrounds, respectively. Transcripts of CGC (Cancer Gene Census) genes  
1429 (Sondka *et al.*, 2018) that do not correspond to OGs or TSGs of the cancer gene list of  
1430 Vogelstein *et al.* (2013) are highlighted by yellow background.

1431

1436 **Additional file 6. Supplementary Table 4.** Statistics of the results of SO (Substitution Only) and  
1437 SSI (Substitutions and Subtle Indel) analyses of the data presented in **Supplementary Table 3.**  
1438 The column marked 'Expected' indicates the parameters (highlighted by orange background)  
1439 expected if we assume that the structure of the genetic code determines the probability of  
1440 somatic substitutions.

1441  
1442 **Additional file 7. Supplementary Table 5.** Comparison of the results of SO (Substitution Only)  
1443 and SSI (Substitutions and Subtle Indel) analyses.

1444  
1445 **Additional file 8. Supplementary Table 6.** Lists of genes ( $CG\_SO^{f-2SD}$ ,  $CG\_SO^{r2-2SD}$ ,  
1446  $CG\_SO^{r3-2SD}$ ,  $CG\_SSI^{f-2SD}$ ,  $CG\_SSI^{r2-2SD}$ ,  $CG\_SSI^{r3-2SD}$ ) whose parameters deviate from the  
1447 mean values by  $>2SD$ . Transcripts of OGs (oncogenes) and TSGs (tumor suppressor genes) of  
1448 the cancer gene list of Vogelstein *et al.* (2013) are highlighted by brick red and blue  
1449 backgrounds, respectively. Transcripts of CGC (Cancer Gene Census) genes (Sondka *et al.*,  
1450 2018) that do not correspond to OGs or TSGs of the cancer gene list of Vogelstein *et al.* (2013)  
1451 are highlighted by yellow background.

1452  
1453 **Additional file 9. Supplementary Table 7.** Comparison of the lists of genes in datasets  
1454  $CG\_SSI^{2SD}\_rNSM > 0.125$  and  $CG\_SO^{2SD}\_rMSN > 3.00$  with the lists of cancer genes identified  
1455 by others (VOG, Vogelstein *et al.*, 2013; TAM, Tamborero *et al.* 2013; LAW, Lawrence *et al.*  
1456 2014; ABB, Abbott *et al.*, 2015; TOR, Torrente *et al.* 2016; ZHO, Zhou *et al.* 2017; MAR,  
1457 Martincorena *et al.* 2017; BAI, Bailey *et al.* 2018; SON, Sondka *et al.*, 2018; ZHA, Zhao *et al.*,  
1458 2019). Transcripts of OGs (oncogenes) and TSGs (tumor suppressor genes) of the cancer gene  
1459 list of Vogelstein *et al.* (2013) are highlighted by brick red and blue backgrounds, respectively.  
1460 Transcripts of CGC genes (SON, Sondka *et al.*, 2018) that do not correspond to OGs or TSGs of  
1461 the cancer gene list of Vogelstein *et al.* (2013) are highlighted by yellow background. Novel  
1462 positively or negatively selected cancer genes validated in the present work are highlighted in  
1463 dark green background.

1464  
1465 **Additional file 10. Supplementary Table 8.** Comparison of the list of negatively selected genes,  
1466  $CG^{2SD}\_rSMN > 0.5$  with the lists of negatively selected genes (WEG and ZHOU), defined by  
1467 Zhou *et al.*, (2017), and Weghorn and Sunyaev (2017), respectively as well as the list of genes  
1468 (De Kegel) identified by De Kegel and Ryan (2019) as broadly essential genes. Negatively  
1469 selected genes discussed in detail in the present work are highlighted in dark green background.

## Additional file 1

### Analyses of somatic substitutions and subtle indel mutations of human protein-coding genes of tumor tissues

We have used two major types of analyses of silent, amino acid changing and truncating somatic mutations of human protein-coding genes of tumor tissues: one in which we have restricted our analyses to single nucleotide substitutions (SO or 'substitution only' analyses, for details, see main text).

Here we describe the analyses that also take into account subtle indels (SSI or 'substitutions and subtle indels' analyses). In these analyses subtle mutations affecting the coding sequences of protein coding genes were assigned to three categories: SIL, silent synonymous substitutions, MIS, merging nonsynonymous substitutions and short inframe indels that alter but do not disrupt coding sequence, and NON, merging nonsense substitutions and short frame-shift indels as both types of mutations lead eventually to stop codons that truncate the protein. Unless otherwise indicated, we have used datasets containing transcripts with at least 100 confirmed somatic, non polymorphic mutations identified in tumor tissues.

We have used several approaches to analyze the contribution of silent, amino acid changing and truncating mutations to somatic mutations of human protein-coding genes during tumor evolution.

In the simplest case we have calculated for each transcript the fraction of somatic mutations that could be assigned to the synonymous (indel\_fS), nonsynonymous (indel\_fM) and nonsense mutation (indel\_fN) category.

Our analyses have shown that in the 3D representation of SSI mutations (**Figure S1 A**) genes are present in a cluster characterized by fraction values of  $0.24082 \pm 0.06203$ ,  $0.70086 \pm 0.05701$  and  $0.05832 \pm 0.04151$  for indel\_fS, indel\_fM and indel\_fN category, respectively. The mean values for indel\_fS, indel\_fM and indel\_fN in this cluster are very similar to those observed for fS, fM and fN in SO analyses (**Supplementary Table 4**), consistent with the observation that in the dataset containing transcripts with at least 100 confirmed somatic, non polymorphic mutations identified in tumor tissues subtle indels are much rarer than single nucleotide substitutions (**Supplementary Table 1**).

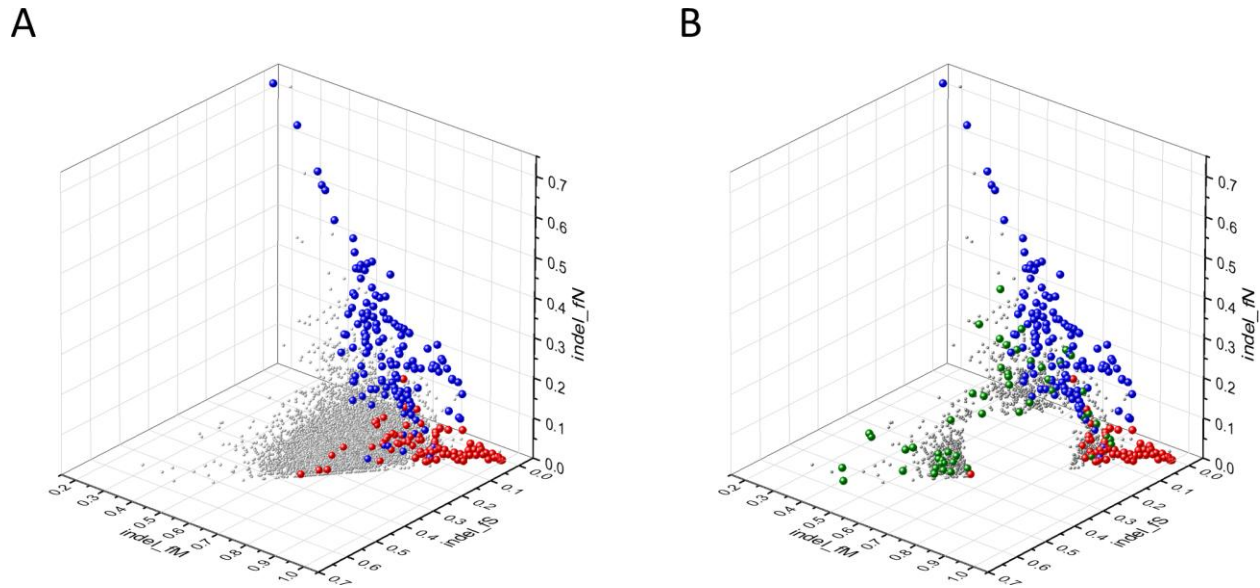

**Figure S1. Analyses of indel\_fS, indel\_fM and indel\_fN parameters of human protein-coding genes of tumor tissues.** The figure shows the results of the analysis of 13930 transcripts containing at least 100 subtle, confirmed somatic non-polymorphic mutations from tumor tissues. Axes  $x$ ,  $y$  and  $z$  represent the fractions of somatic mutations that are assigned to the indel\_fS, indel\_fM and indel\_fN categories. In **Panel A** each ball represents a human transcript; note that the majority of human genes are present in a dense cluster. The positions of transcripts of the genes defined by Vogelstein *et al.*, (2013) as oncogenes (OGs, large red balls) or tumor suppressor genes (TSGs, large blue balls) are highlighted. It is noteworthy that these driver genes separate significantly from the central cluster and from each other: OGs have an increased fraction of indel\_fM, whereas TSGs have markedly increased fraction of indel\_fN. **Panel B** shows data only for candidate cancer genes present in the CG\_SO<sup>2SD</sup>\_SSI<sup>2SD</sup> list (see **Supplementary Table 6**). The positions of transcripts of the genes identified by Vogelstein *et al.*, (2013) as oncogenes (OGs, large red balls) or tumor suppressor genes (TSGs, large blue balls) are highlighted. The positions of novel cancer gene transcripts validated in the present work are highlighted as large green balls.

It is noteworthy, however, that the pattern of indel\_fS, indel\_fM and indel\_fN of the best known cancer genes (Vogelstein *et al.*, 2013) deviates significantly from that characteristic of the majority of human genes (**Figure S1 A**). The values for OGs show a marked increase in indel\_fM, reflecting positive selection for missense mutations, whereas the values for TSGs show significant increase in indel\_fN, reflecting primarily positive selection for truncating nonsense mutations. The set of genes (6139 transcripts) with values that deviate from mean values of indel\_fS, indel\_fM and indel\_fN by more than 1SD have also included the majority of OGs and TSGs (only 5 OG and 1 TSG transcripts remained in the central cluster). It is noteworthy that the 6139 transcripts also contained the vast majority (443 out of 748) of the transcripts of CGC genes, suggesting that the mutation pattern of most CGC genes also deviates significantly from that of passenger genes (**Supplementary Table 4**). The genes in the central cluster (**Supplementary Table 3**) are hereafter referred to as PG\_SSI<sup>≤1SD</sup> (for Passenger Gene\_Substitution and Subtle Indels deviating from mean indel\_fS, indel\_fM and indel\_fN values by  $\leq 1SD$ ).

The set of genes (1211 transcripts) with values that deviate from mean values of  $\text{indel\_fS}$ ,  $\text{indel\_fM}$  and  $\text{indel\_fN}$  by more than 2SD (**Figure S1 B**) contained 62 OG and 123 TSG driver gene transcripts. Using this more stringent cut-off value the number of additional CGC genes identified in the 1211 transcripts was reduced to 153 out of 748 (**Supplementary Table 4**). The non-passenger gene set defined by 2SD cut-off value is hereafter referred to as  $\text{CG\_SSI}^{\text{f-2SD}}$  for Cancer Gene\_Substitution and Subtle Indels deviating from mean  $\text{indel\_fS}$ ,  $\text{indel\_fM}$  and  $\text{indel\_fN}$  values by more than 2SD (**Supplementary Table 4**).

The 1211 transcripts in the gene set of  $\text{CG\_SSI}^{\text{f-2SD}}$  contain 873 transcripts not found in the OG, TSG and CGC cancer gene lists (**Supplementary Table 3**). Since the majority of these 873 transcripts (derived from 743 genes) have parameters that assign them to the OG or TSG clusters, we assume that they also qualify as candidate oncogenes or tumor suppressor genes. There is, however, a third group of genes that deviate from both the central passenger gene cluster and the clusters of OGs and TSGs (**Figure S1 B**): their high  $\text{indel\_fS}$  and low  $\text{indel\_fM}$  and  $\text{indel\_fN}$  values suggest that they experience purifying selection during tumor evolution, suggesting that they may correspond to tumor essential genes important for the growth and survival of tumors. The 743 putative cancer genes listed in  $\text{CG\_SSI}^{\text{f-2SD}}$  of **Supplementary Table 3**, were subjected to further analyses to decide whether they qualify as candidate oncogenes, tumor suppressor genes, tumor essential genes or the deviation of their mutation pattern from those of passenger genes is not the result of natural selection. For some typical examples of these analyses see **Additional file 2**.

Known cancer genes (OGs and TSGs) also separate from the majority of human genes in 3D representations of parameters  $\text{indel\_rSM}$ ,  $\text{indel\_rNM}$ ,  $\text{indel\_rNS}$  defined as the ratio of  $\text{indel\_fS}/\text{indel\_fM}$ ,  $\text{indel\_fN}/\text{indel\_fM}$ ,  $\text{indel\_fN}/\text{indel\_fS}$ , respectively (**Figure S2**). In these representations (**Figure S2, A1, A2**) OGs separate from the central cluster in having significantly lower  $\text{indel\_rSM}$  and  $\text{indel\_rNM}$  values, whereas TSGs had significantly higher  $\text{indel\_rNS}$  and  $\text{indel\_rNM}$  values than the those of the central cluster.

The set of genes (4518 transcripts) with values that deviate from the mean by more than 1SD contained 78 OG transcripts, 132 TSG transcripts and 368 additional CGC gene transcripts. The central cluster of genes (that deviate from mean  $\text{rSM}$ ,  $\text{rNM}$  and  $\text{rNS}$  values by  $\leq 1\text{SD}$ ) is hereafter referred to as  $\text{PG\_SSI}^{\text{r}^2-1\text{SD}}$  (for Passenger Gene\_Substitution and Subtle Indels deviating from mean  $\text{indel\_rSM}$ ,  $\text{indel\_rNM}$ ,  $\text{indel\_rNS}$  values by  $\leq 1\text{SD}$ ).

A1

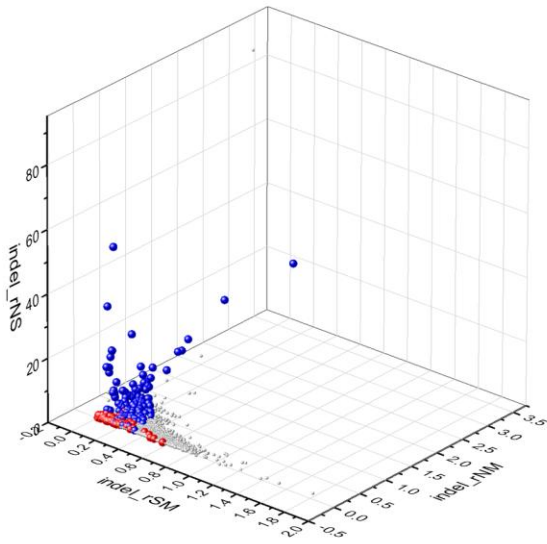

A2

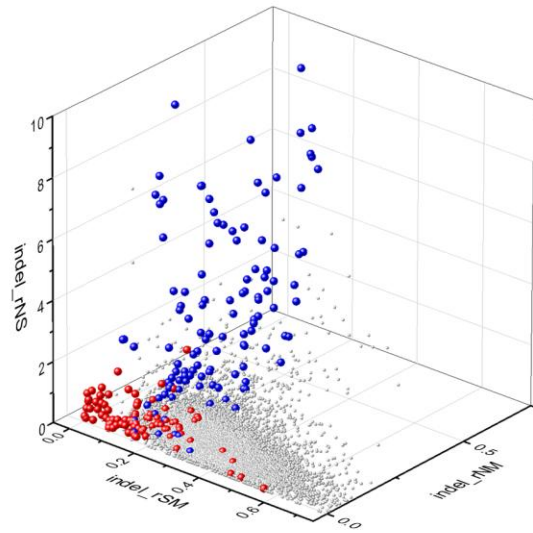

B1

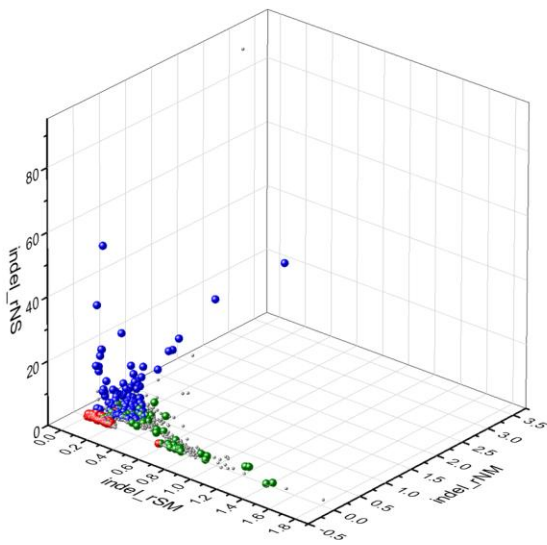

B2

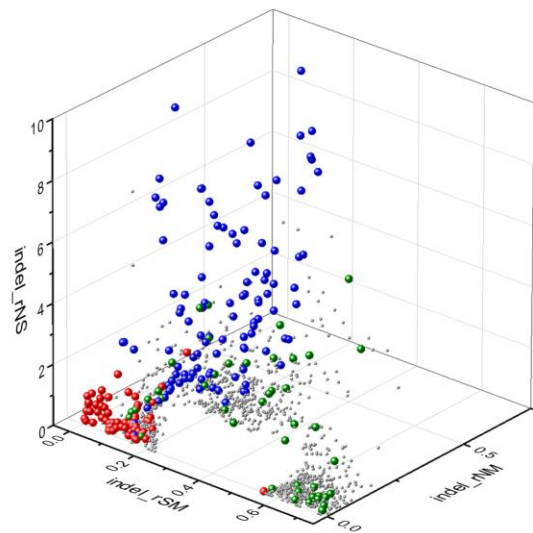

**Figure S2. Analyses of indel\_rSM, indel\_rNM, indel\_rNS parameters of human protein-coding genes of tumor tissues.** The figure shows the results of the analysis of 13930 transcripts containing at least 100 subtle, confirmed somatic mutations from tumor tissues, including only mutations identified as not SNPs. Axes  $x$ ,  $y$  and  $z$  represent the indel\_rSM, indel\_rNM, indel\_rNS values defined as the ratio of indel\_fS/ indel\_fM, indel\_fN/ indel\_fM, indel\_fN/ indel\_fS, respectively. Each ball represents a human transcript; the positions of transcripts of the genes identified by Vogelstein *et al.*, (2013) as oncogenes (OGs, large red balls) or tumor suppressor genes (TSGs, large blue balls) are highlighted. **Panels A1, A2** show the distribution of the 13930 transcripts at different magnification. Note that the majority of human genes are present in a dense cluster but known OGs and TSGs separate significantly from the central cluster and from each other. The rNS and rNM values of TSGs are higher, whereas the rSM and rNM values of OGs are lower than those of passenger genes. **Panels B1, B2** show data only for candidate cancer genes present in the CG\_SO<sup>2SD</sup>\_SSI<sup>2SD</sup> list (see **Supplementary Tables 6**). The positions of transcripts of the genes identified by Vogelstein *et al.*, (2013) as oncogenes (OGs, large red balls) or tumor suppressor genes (TSGs, large blue balls) are highlighted. The positions of novel cancer gene transcripts validated in the present work are highlighted as large green balls.

The non-passenger gene set defined by 2SD cut-off value (**Figure S2 B1, B2, Supplementary Table 3**) is hereafter referred to as  $CG\_SSI^{r2\_2SD}$  for Cancer Gene Substitution and Subtle Indels deviating from mean  $indel\_rSM$ ,  $indel\_rNM$ ,  $indel\_rNS$  values by more than 2SD (**Supplementary Table 4**). This gene set has a total of 861 transcripts, containing 40 transcripts of OGs, 98 transcripts of TSGs genes, an additional 86 transcripts of CGC genes and 637 transcripts (derived from 546 genes) not found in the OG, TSG and CGC cancer gene lists (**Supplementary Table 3**).

The mean parameters of TSGs differ markedly from those of passenger genes in that  $indel\_rNS$  and  $indel\_rNM$  values are higher (**Figure S2 A1, A2**), reflecting the dominance of positive selection for inactivating mutations. The parameters for OGs on the other hand, differ from those of passenger genes in that  $indel\_rSM$  values of OGs are significantly lower, reflecting positive selection for missense mutations (**Figure S2 A1, A2**). Interestingly, in this representation some oncogenes (e.g. *BCL2*) have unusually high scores of  $indel\_rSM$  suggesting that in the case of these oncogenes purifying selection may override positive selection for amino acid changing mutations.

As mentioned above, the non-passenger gene set defined by a cut-off values of 2SD contains 637 transcripts (derived from 546 genes) not found in the OG, TSG or CGC lists. Since the majority of these genes have parameters that assign them to the OG or TSG clusters, they can be regarded as candidate oncogenes or tumor suppressor genes. There is a group of genes that deviate from the clusters of passenger genes, OGs and TSGs (**Figure S2 B1, B2**) in that they have unusually high  $indel\_rSM$  values. Since high  $indel\_rSM$  values may be indicative of purifying selection we assume that they may correspond to tumor essential genes important for the growth and survival of tumors. The 546 putative cancer genes listed in  $CG\_SO^{indel\_r2\_2SD}$  of **Supplementary Table 3**, were subjected to further analyses to decide whether they qualify as candidate OGs, TSGs, TEGs or the deviation of their mutation pattern from those of passenger genes is not the result of natural selection. For examples of these analyses see **Additional file 2**.

A1

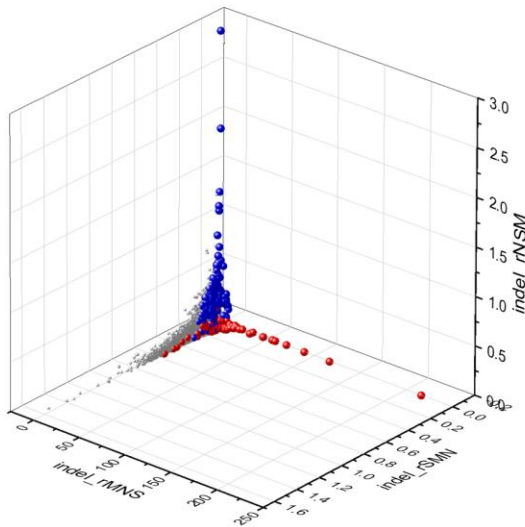

A2

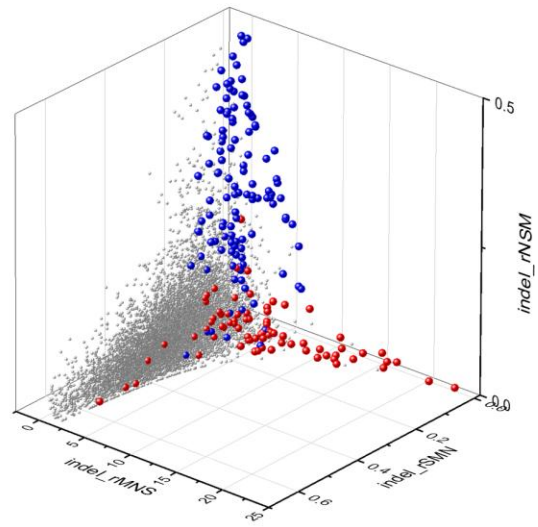

B1

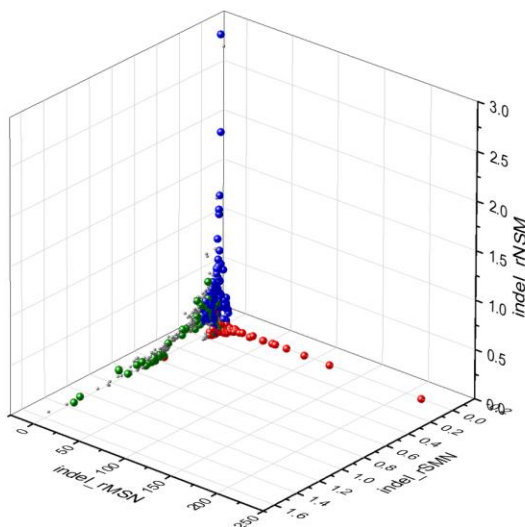

B2

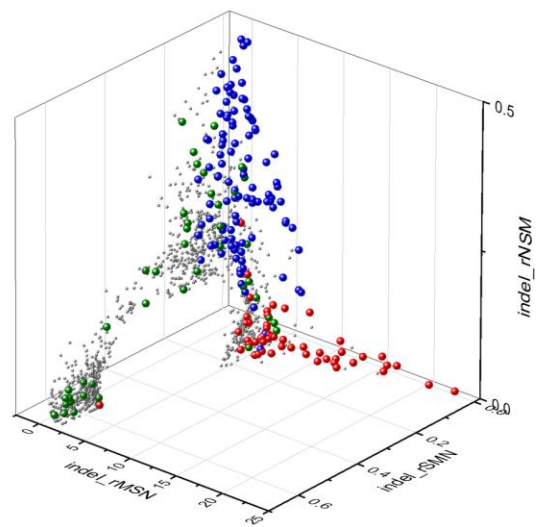

**Figure S3. Analyses of  $indel\_rSMN$ ,  $indel\_rMSN$  and  $indel\_rNSM$  parameters of human protein-coding genes of tumor tissues.** The figure shows the results of the analysis of 13930 transcripts containing at least 100 subtle, confirmed somatic mutations from tumor tissues. Axes  $x$ ,  $y$  and  $z$  represent parameters  $indel\_rSMN$ ,  $indel\_rMSN$  and  $indel\_rNSM$  defined as the ratio of  $indel\_fS/(indel\_fM+indel\_fN)$ ,  $indel\_fM/(indel\_fS+indel\_fN)$  and  $indel\_fN/(indel\_fS+indel\_fM)$ , respectively. Each ball represents a human transcript; the positions of transcripts of the genes defined by Vogelstein *et al.*, (2013) as oncogenes (OGs, red balls) or tumor suppressor genes (TSGs, blue balls) are highlighted. **Panels A1, A2** show the distribution of the 13930 transcripts at different magnification. Note that the majority of human genes are present in a dense cluster but known OGs and TSGs separate significantly from the central cluster and from each other. The  $indel\_rNSM$  values of TSGs are higher, their  $indel\_rMSN$  and  $indel\_rSMN$  are lower than those of passenger genes. OGs also separate from passenger genes in that their  $indel\_rMSN$  values are higher and their  $indel\_rSMN$  values are lower than those of passenger genes. **Panels B1, B2** show data at different magnification only for candidate cancer genes present in the  $CG\_SO^{2SD}\_SSI^{2SD}$  list (see **Supplementary Table 6**). The positions of transcripts of the genes identified by Vogelstein *et al.*, (2013) as



oncogenes (OGs, large red balls) or tumor suppressor genes (TSGs, large blue balls) are highlighted. The positions of novel cancer gene transcripts validated in the present work are highlighted as large green balls.

The separation of known cancer genes from the majority of human genes is also observed in 3D representations of parameters  $\text{indel\_rSMN}$ ,  $\text{indel\_rMSN}$  and  $\text{indel\_rNSM}$  defined as the ratio of  $\text{indel\_fS}/(\text{indel\_fM}+\text{indel\_fN})$ ,  $\text{indel\_fM}/(\text{indel\_fS}+\text{indel\_fN})$  and  $\text{indel\_fN}/(\text{indel\_fS}+\text{indel\_fM})$ , respectively (**Figure S3 A1, A2**). In this representation the genes are present in a three pronged cluster.

The set of genes (4369 transcripts) with values that deviate from the mean by more than 1SD, contained 78 OG transcripts, 132 TSG transcripts and 354 additional CGC gene transcripts. The central cluster of genes, deviating from mean  $\text{rSMN}$ ,  $\text{rMSN}$  and  $\text{rNSM}$  values by  $\leq 1\text{SD}$  is hereafter referred to as  $\text{PG\_SO}^{\text{indel\_r}^3\text{-1SD}}$  (for Passenger Gene Substitution and Subtle Indels deviating from mean  $\text{indel\_rSMN}$ ,  $\text{indel\_rMSN}$  and  $\text{indel\_rNSM}$  values by  $\leq 1\text{SD}$ ),

The non-passenger gene set defined by 2SD cut-off value (**Figure S3 B1, B2, Supplementary Table 3**) is hereafter referred to as  $\text{CG\_SSI}^{\text{r}^3\text{-2SD}}$  for Cancer Gene Substitution and Subtle Indels deviating from mean  $\text{indel\_rSMN}$ ,  $\text{indel\_rMSN}$  and  $\text{indel\_rNSM}$  values by more than 2SD (**Supplementary Table 4**).

This gene set has a total of 823 transcripts, containing transcripts of 37 OGs, 100 TSGs, an additional 86 CGC genes and 600 transcripts (derived from 510 genes) not found in the OG, TSG and CGC cancer gene lists (**Supplementary Table 3**).

The mean parameters of TSGs differ markedly from those of passenger genes in as much as  $\text{indel\_rNSM}$  values of TSGs are higher and  $\text{indel\_rSMN}$  values are lower, reflecting the dominance of positive selection for inactivating mutations. In the case of OGs on the other hand,  $\text{indel\_rMSN}$  values are higher and  $\text{indel\_rNSM}$  values are lower than those of passenger genes, reflecting positive selection for missense mutations and purifying selection avoiding nonsense mutations. Interestingly, some oncogenes have unusually high scores of  $\text{indel\_rSMN}$  suggesting that in these cases (e.g. *BCL2*) purifying selection may override positive selection for amino acid changing mutations.

As mentioned above, the non-passenger gene set defined by a cut-off values of 2SD contains 600 transcripts (derived from 510 genes) not found in the OG, TSG or CGC lists. Since the majority of these genes have parameters that assign them to the OG or TSG clusters, they can be regarded as candidate oncogenes or tumor suppressor genes.

In this representation we also note the existence of a group of genes that deviates from the clusters of passenger genes, OGS and TSGs (**Figure S3**): their high  $\text{indel\_rSMN}$  and low  $\text{indel\_rMSN}$  and  $\text{indel\_rNSM}$  values suggest that they experience purifying selection during tumor evolution, suggesting that they may be essential for the survival of tumors as oncogenes or tumor essential genes. The 510 putative cancer genes listed in  $\text{CG\_SSI}^{\text{r}^3\text{-2SD}}$  of **Supplementary Table 3**, were subjected to further analyses to decide whether they qualify as candidate oncogenes, tumor suppressor genes and tumor essential genes or the deviation of their mutation pattern from those of passenger genes is not the result of natural selection. For some typical examples of these analyses see **Additional file 2**.

## Additional file 2

# Examples of genes with strong signatures of positive and/or negative selection

The assignments of the genes to key cellular processes of carcinogenesis are summarized in **Table 1** of the main text.

## Novel cancer genes positively selected for truncating mutations

### Beta-1,3-galactosyltransferase 1, encoded by the *B3GALT1* gene

B3GALT1 belongs to the glycosyltransferase 31 family. It transfers galactose from UDP-alpha-D-galactose to substrates with a terminal beta-N-acetylglucosamine residue. B3GALT1 is involved in the biosynthesis of the carbohydrate moieties of glycolipids and glycoproteins.

It has been suggested that loss of the activity of B3GALT1 may play an important role in aberrant protein glycosylation and tumor progression in colorectal cancers (Venkitachalam *et al.*, 2016). Although such a role would be consistent with positive selection for inactivating mutations, analysis of the distribution of nonsense mutations along the protein sequence suggests that the high rNSM value is an artifact, rather than a signature of positive selection for inactivating mutations. The high rate of nonsense substitutions vs. sense substitutions is due to the fact that the majority of sequences contain nonsense substitution at a single site (p.R199\*). Since there is no reason why selection would favor nonsense mutation at a single site it seems more likely that it reflects some sort of data deposition error. It is noteworthy in this respect that all the samples containing the p.R199\* mutations originate from different regions of pancreatic tumor tissue samples from a single study (Yachida *et al.*, 2016).

Venkitachalam S, Revoredo L, Varadan V, Fecteau RE, Ravi L, Lutterbaugh J, Markowitz SD, Willis JE, Gerken TA, Guda K. Biochemical and functional characterization of glycosylation-associated mutational landscapes in colon cancer. *Sci Rep.* 2016; 6:23642.

Yachida S, Wood LD, Suzuki M, Takai E, Totoki Y, Kato M, Luchini C, Arai Y, Nakamura H, Hama N, Elzawahry A, Hosoda F, Shiota T *et al.* Genomic Sequencing Identifies ELF3 as a Driver of Ampullary Carcinoma. *Cancer Cell.* 2016; 29:229-2240.

### Bone morphogenetic protein receptor type-2, encoded by the *BMPR2* gene

Bone morphogenetic protein receptor type-2 is a member of the TGF beta family of growth factor receptors. Upon ligand binding it forms a receptor complex consisting of two type II and two type I transmembrane serine/threonine kinases and activates SMAD transcriptional regulators.

There is convincing evidence in the literature that BMPR2 is a tumor suppressor. The *BMPR2* gene has been shown to contain several somatic frameshift mutations and to be inactivated in gastric and colorectal cancers with microsatellite instability (Kodach *et al.*, 2008;

Park *et al.*, 2010). Loss of BMPR2 function has been found to result in increased tumorigenicity in human prostate cancer cells (Kim *et al.*, 2004). More recent studies have shown that disruption of BMPR2 expression promotes mammary carcinoma metastases (Owens *et al.*, 2012; Pickup *et al.*, 2015). It was shown that loss of BMPR2 results in increased chemokine expression, which facilitates inflammation by a sustained increase in myeloid cells. The chemokines increased in *BMPR2* deleted cells correlated with poor outcome in human breast cancer patients, suggesting that BMPR2 has tumor suppressive functions in the stroma by regulating inflammation (Pickup *et al.*, 2015).

Kim IY, Lee DH, Lee DK, Ahn HJ, Kim MM, Kim SJ, Morton RA. Loss of expression of bone morphogenetic protein receptor type II in human prostate cancer cells. *Oncogene*. 2004; 23:7651-7659.

Kodach LL, Wiercinska E, de Miranda NF, Bleuming SA, Musler AR, Peppelenbosch MP, Dekker E, van den Brink GR, van Noesel CJ, Morreau H, Hommes DW, Ten Dijke P, Offerhaus GJ, et al. The bone morphogenetic protein pathway is inactivated in the majority of sporadic colorectal cancers. *Gastroenterology*. 2008; 134:1332-1341

Owens P, Pickup MW, Novitskiy SV, Chytil A, Gorska AE, Aakre ME, West J, Moses HL. Disruption of bone morphogenetic protein receptor 2 (BMPR2) in mammary tumors promotes metastases through cell autonomous and paracrine mediators. *Proc Natl Acad Sci U S A*. 2012; 109:2814-2819

Park SW, Hur SY, Yoo NJ, Lee SH. Somatic frameshift mutations of bone morphogenetic protein receptor 2 gene in gastric and colorectal cancers with microsatellite instability. *APMIS*. 2010; 118:824-829.

Pickup MW, Hover LD, Polikowsky ER, Chytil A, Gorska AE, Novitskiy SV, Moses HL, Owens P. *BMPR2* loss in fibroblasts promotes mammary carcinoma metastasis via increased inflammation. *Mol Oncol*. 2015; 9:179-191

## **Bromodomain-containing protein 7, encoded by the *BRD7* gene**

*BRD7* is a crucial component of both functional p53 and BRCA1 pathways and recent studies have fully established *BRD7* as a tumor suppressor. The expression of *BRD7* was shown to be downregulated in various cancers, including breast cancer, nasopharyngeal carcinoma, gastric cancer, colorectal carcinoma, ovarian cancer, lung adenocarcinoma, non-small cell lung cancer, hepatocellular carcinoma and prostate cancer. Moreover, *BRD7* inhibited cancer cell growth and metastasis and promoted apoptosis *in vitro* and *in vivo* (Yu, Li and Shen, 2016; Gao, Wang and Gao, 2016; Chen *et al.*, 2016; Li *et al.*, 2015).

Recent studies suggest that *BRD7* exerts its tumor suppressive role through multiple pathways, by suppressing cell proliferation, initiating cell apoptosis and reducing aerobic glycolysis (Niu *et al.*, 2018). These studies suggest that *BRD7* inhibits the Warburg effect through inactivation of the HIF1 $\alpha$ /LDHA axis.

Chen CL, Wang Y, Pan QZ, Tang Y, Wang QJ, Pan K, Huang LX, He J, Zhao JJ, Jiang SS, Zhang XF, Zhang HX, Zhou ZQ et al. Bromodomain-containing protein 7 (BRD7) as a potential tumor suppressor in hepatocellular carcinoma. *Oncotarget*. 2016; 7:16248-16261.

Gao Y, Wang B, Gao S. *BRD7* Acts as a Tumor Suppressor Gene in Lung Adenocarcinoma. *PLoS One*. 2016; 11:e0156701

Li D, Yang Y, Zhu G, Liu X, Zhao M, Li X, Yang Q. MicroRNA-410 promotes cell proliferation by targeting *BRD7* in non-small cell lung cancer. *FEBS Lett*. 2015; 589:2218-2223

Niu W, Luo Y, Wang X, Zhou Y, Li H, Wang H, Fu Y, Liu S, Yin S, Li J, Zhao R, Liu Y, Fan S et al. *BRD7* inhibits the Warburg effect and tumor progression through inactivation of HIF1 $\alpha$ /LDHA axis in breast cancer. *Cell Death Dis*. 2018; 9:519.

Yu X, Li Z, Shen J. *BRD7*: a novel tumor suppressor gene in different cancers. *Am J Transl Res*. 2016; 8:742-748.

## **Inhibitor of growth protein 1 encoded by the *ING1* gene**

*ING1* encodes a nuclear, cell cycle-regulated protein, overexpression of which efficiently blocks cell growth and is capable of inducing apoptosis in different experimental systems (Toyama *et al.*, 1999). *ING1* is known to cooperate with p53/TP53 in the negative regulatory pathway of cell growth by modulating p53-dependent transcriptional activation.

The tumor suppressor status of *ING1* has been fully established since several studies have described the loss of *ING1* protein expression in human tumors and *ING1* knockout mice were reported to have spontaneously developed tumors, B cell lymphomas, and soft tissue sarcomas (Guérillon, Larrieu and Pedeux, 2013).

*ING1* levels were found to be lower in breast tumors compared to adjacent normal breast tissue (Thakur *et al.* 2014). Decreasing levels of *ING1* increased, and increasing levels decreased migration and invasion of cancer cells *in vitro*. *ING1* overexpression also blocked cancer cell metastasis *in vivo* and eliminated tumor-induced mortality in mouse models.

*ING1* can inhibit the growth of lung cancer cell lines through the induction of cell cycle arrest and apoptosis by forming a complex with p53 (Luo *et al.*, 2011; Bose *et al.*, 2014)

Genetic alterations that abrogate the normal function of *ING1* may contribute to esophageal squamous cell carcinogenesis (Chen *et al.*, 2001). Mutations of the *ING1* tumor suppressor gene detected in human melanoma abrogate nucleotide excision repair activity of the protein (Campos *et al.*, 2004). Nonsense mutations cluster in the region of residues 339-378. These mutations eliminate the Zn finger domain and polybasic region, which are involved in interaction with histone H3 trimethylated at Lys4 (H3K4me3). It is noteworthy that histone H3K4me3 binding is required for the DNA repair and apoptotic activities of the *ING1* tumor suppressor (Pena *et al.*, 2008).

Bose P, Thakur SS, Brockton NT, Klimowicz AC, Kornaga E, Nakoneshny SC, Riabowol KT, Dort JC Tumor cell apoptosis mediated by cytoplasmic *ING1* is associated with improved survival in oral squamous cell carcinoma patients. *Oncotarget*. 2014; 5:3210-3219.

Campos EI, Martinka M, Mitchell DL, Dai DL, Li G. Mutations of the *ING1* tumor suppressor gene detected in human melanoma abrogate nucleotide excision repair. *Int J Oncol*. 2004; 25:73-80.

Chen L, Matsubara N, Yoshino T, Nagasaka T, Hoshizima N, Shirakawa Y, Naomoto Y, Isozaki H, Riabowol K, Tanaka N. Genetic alterations of candidate tumor suppressor *ING1* in human esophageal squamous cell cancer. *Cancer Res*. 2001; 61:4345-4349.

Guérillon C, Larrieu D, Pedeux R. *ING1* and *ING2*: multifaceted tumor suppressor genes. *Cell Mol Life Sci*. 2013; 70:3753-3772.

Luo ZG, Tang H, Li B, Zhu Z, Ni CR, Zhu MH. Genetic alterations of tumor suppressor *ING1* in human non-small cell lung cancer. *Oncol Rep*. 2011; 25:1073-1081

Peña PV, Hom RA, Hung T, Lin H, Kuo AJ, Wong RP, Subach OM, Champagne KS, Zhao R, Verkhusha VV, Li G, Gozani O, Kutateladze TG. Histone H3K4me3 binding is required for the DNA repair and apoptotic activities of *ING1* tumor suppressor. *J Mol Biol*. 2008;380:303-312.

Thakur S, Singla AK, Chen J, Tran U, Yang Y, Salazar C, Magliocco A, Klimowicz A, Jirik F, Riabowol K. Reduced *ING1* levels in breast cancer promotes metastasis. *Oncotarget*. 2014; 5:4244-4256.

Toyama T, Iwase H, Watson P, Muzik H, Saettler E, Magliocco A, DiFrancesco L, Forsyth P, Garkavtsev I, Kobayashi S, Riabowol K. Suppression of *ING1* expression in sporadic breast cancer. *Oncogene*. 1999; 18:5187-5193.

## **MAX gene-associated protein, encoded by the *MGA* gene**

*MGA* functions as a dual-specificity transcription factor, regulating the expression of both MAX-network and T-box family target genes. Suppresses transcriptional activation by MYC and inhibits MYC-dependent cell transformation. Recurrent inactivation of *MGA*, a

suppressor of MYC, has been shown to occur in lymphocytic leukemia, and in both non-small cell lung cancer and small cell lung cancer, colorectal cancer (De Paoli *et al.*, 2013; Romero *et al.*, 2014; Jo *et al.*, 2016).

De Paoli L, Cerri M, Monti S, Rasi S, Spina V, Brusca A, Greco M, Ciardullo C, Famà R, Cresta S, Maffei R, Ladetto M, Martini M, et al. MGA, a suppressor of MYC, is recurrently inactivated in high risk chronic lymphocytic leukemia. *Leuk Lymphoma*. 2013; 54:1087-1090.

Jo YS, Kim MS, Yoo NJ, Lee SH. Somatic mutation of a candidate tumour suppressor *MGA* gene and its mutational heterogeneity in colorectal cancers. *Pathology*. 2016; 48:525-527.

Romero OA, Torres-Diz M, Pros E, Savola S, Gomez A, Moran S, Saez C, Iwakawa R, Villanueva A, Montuenga LM, Kohno T, Yokota J, Sanchez-Cespedes M. MAX inactivation in small cell lung cancer disrupts MYC-SWI/SNF programs and is synthetic lethal with BRG1. *Cancer Discov*. 2014; 4:292-303.

## **Proline-rich transmembrane protein 2, encoded by the *PRRT2* gene**

PPRT2, as a component of the outer core of AMPAR complex, is involved in ion channel functions. *PRRT2* has been shown to be significantly downregulated in glioblastoma tissues compared with normal brain tissue (Bi *et al.*, 2017; Li *et al.*, 2018). Overexpression of *PRRT2* strongly impaired the cell viability and promoted cell apoptosis. These anti-tumor effects indicate that *PRRT2* acts as a tumor suppressor in glioma. *PRRT2* has been shown to have an inhibitory effect on proliferation, consistent with the low expression level of *PRRT2* in cancer versus normal samples (Alves *et al.*, 2017).

Alves IT, Cano D, Böttcher R, van der Korput H, Dinjens W, Jenster G, Trapman J. A mononucleotide repeat in *PRRT2* is an important, frequent target of mismatch repair deficiency in cancer. *Oncotarget*. 2017; 8:6043-6056

Bi G, Yan J, Sun S, Qu X. *PRRT2* inhibits the proliferation of glioma cells by modulating unfolded protein response pathway. *Biochem Biophys Res Commun*. 2017; 485:454-460.

Li Z, Guo J, Ma Y, Zhang L, Lin Z. Oncogenic Role of MicroRNA-30b-5p in Glioblastoma Through Targeting Proline-Rich Transmembrane Protein 2. *Oncol Res*. 2018; 26:219-230

## **Ras GTPase-activating protein 1, encoded by the *RASA1* gene**

*RASA1* is an inhibitory regulator of the Ras-cyclic AMP pathway. Consistent with the tumor suppressor role of *RASA1*, the circular RNA circ-ITCH was shown to suppress ovarian carcinoma progression through targeting miR-145/*RASA1* signaling, by increasing the level of *RASA1* (Hu *et al.*, 2018).

There is evidence that *RASA1* is a potent tumor suppressor gene that is frequently downregulated or inactivated in several human cancer types. *RASA1* expression is frequently reduced in breast cancer tissues, and the reduced *RASA1* expression is associated with breast cancer progression and poor survival and disease-free survival of patients (Liu *et al.*, 2015).

In hepatocellular carcinoma patients low level of *RASA1* expression correlated with a significantly poorer survival compared to those with high level of *RASA1* expression, suggesting that *RASA1* could serve as an independent prognostic marker for hepatocellular carcinoma patients (Chen *et al.*, 2017).

Analyses of melanoma whole genome sequencing data have led to the identification of two novel, clustered somatic missense mutations (Y472H and L481F) in *RASA1* (Sung *et al.*, 2016). Unlike wild type *RASA1*, these mutants, do not suppresses soft agar colony formation

and tumor growth of melanoma cell lines. In addition to mutations, loss of RASA1 expression was frequently observed in metastatic melanoma samples and a low level of RASA1 mRNA expression was associated with decreased overall survival in melanoma patients. Thus, these data support that RASA1 is inactivated by mutations or by suppressed expression in melanoma and that RASA1 plays a tumor suppressive role.

The tumor suppressor role of RASA1 is also supported by the fact that knockdown or miR targeting of *RASA1* significantly enhanced invasion and migration of multiple pancreatic cancer cells (Sun *et al.*, 2013; Kent, Mendell and Rottapel, 2016).

Chen YL, Huang WC, Yao HL, Chen PM, Lin PY, Feng FY, Chu PY. Down-regulation of RASA1 Is Associated with Poor Prognosis in Human Hepatocellular Carcinoma. *Anticancer Res.* 2017; 37:781-785.

Hu J, Wang L, Chen J, Gao H, Zhao W, Huang Y, Jiang T, Zhou J, Chen Y. The circular RNA circ-ITCH suppresses ovarian carcinoma progression through targeting miR-145/RASA1 signaling. *Biochem Biophys Res Commun.* 2018; 505:222-228.

Kent OA, Mendell JT, Rottapel R. Transcriptional Regulation of miR-31 by Oncogenic KRAS Mediates Metastatic Phenotypes by Repressing RASA1. *Mol Cancer Res.* 2016; 14:267-277.

Liu Y, Liu T, Sun Q, Niu M, Jiang Y, Pang D. Downregulation of Ras GTPase-activating protein 1 is associated with poor survival of breast invasive ductal carcinoma patients. *Oncol Rep.* 2015; 33:119-124.

Sun D, Wang C, Long S, Ma Y, Guo Y, Huang Z, Chen X, Zhang C, Chen J, Zhang J C/EB P- $\beta$ -activated microRNA-223 promotes tumour growth through targeting RASA1 in human colorectal cancer. *Br J Cancer.* 2015; 112:1491-500.

Sung H, Kanchi KL, Wang X, Hill KS, Messina JL, Lee JH, Kim Y, Dees ND, Ding L, Teer JK, Yang S, Sarnaik AA, Sondak VK, et al. Inactivation of RASA1 promotes melanoma tumorigenesis via R-Ras activation. *Oncotarget.* 2016; 7:23885-23896.

### **E3 ubiquitin-protein ligase RNF128, encoded by the *RNF128* gene**

E3 ubiquitin-protein ligase RNF128 catalyzes 'Lys-48'- and 'Lys-63'-linked polyubiquitin chains formation. Consistent with its suggested tumor suppressor role, downregulation of *RNF128* was found to predict poor prognosis in patients with urothelial carcinoma and urinary bladder. Downregulation of *RNF128* was correlated with cancer invasiveness and metastasis as well as reduced survival in patients (Lee *et al.*, 2016). *RNF128* downregulation was also shown to correlate with the malignant phenotype of melanoma (Wei *et al.*, 2019).

Lee YY, Wang CT, Huang SK, Wu WJ, Huang CN, Li CC, Chan TC, Liang PI, Hsing CH, Li CF. Downregulation of *RNF128* Predicts Progression and Poor Prognosis in Patients with Urothelial Carcinoma of the Upper Tract and Urinary Bladder. *J Cancer.* 2016; 7:2187-2196.

Wei CY, Zhu MX, Yang YW, Zhang PF, Yang X, Peng R, Gao C, Lu JC, Wang L, Deng XY, Lu NH1, Qi FZ, Gu JY. Downregulation of *RNF128* activates Wnt/ $\beta$ -catenin signaling to induce cellular EMT and stemness via CD44 and CTTN ubiquitination in melanoma. *J Hematol Oncol.* 2019; 12:21.

### **Monocarboxylate transporter 1, MCT1 encoded by the *SLC16A1* gene**

SLC16A1 is a multipass plasma membrane protein that functions as a proton-coupled monocarboxylate transporter. It catalyzes the rapid transport across the plasma membrane of many monocarboxylates such as lactate. Depending on the tissue and on circumstances, mediates the import or export of lactic acid. Deficiency of this lactate transporter may result in an acidic intracellular environment created by muscle activity with consequent degeneration of muscle.

Although the high values of rNSM would suggest a tumor suppressor role for *SLC16A1*, several studies suggest that the protein may serve a pro-oncogenic role. For example, depletion of *SLC16A1* was found to decrease cellular proliferation and invasion in both neuroblastoma and malignant cutaneous melanoma cell lines, suggesting its role as an oncogene (Avitabile *et al.*, 2019). The pro-oncogenic role of MCT1 is also supported by the results of studies on esophageal squamous cell carcinoma ESCC. Kaplan-Meier survival analysis of ESCC patients in a high-MCT1 group had a lower overall survival and lower progression-free survival, whereas downregulation of MCT1 suppressed proliferation and survival of ESCC cells *in vitro* (Chen *et al.*, 2019). Disrupting MCT1 function leads to an accumulation of intracellular lactate that rapidly disables tumor cell growth (Doherty *et al.*, 2014).

MCT1 expression is elevated in glycolytic breast tumors, and high MCT1 expression predicts poor prognosis in breast and lung cancer patients. Similarly, the observations that MCT1 inhibition impairs proliferation of glycolytic breast cancer cells co-expressing MCT1 and MCT4 and that MCT1 loss-of-function decreases breast cancer cell proliferation and blocks growth of mammary fat pad xenograft tumors suggest a pro-oncogenic or tumor essential role for MCT1 (Hong *et al.*, 2016).

A recent study, however, has led to the conclusion that MCT1 and MCT4 have opposing roles in carcinogenesis (Sukeda *et al.*, 2019). In a retrospective survey conducted on patients who underwent surgical resection for pancreatic ductal adenocarcinoma the expression of MCT1, MCT4, and GLUT1 was assessed in tumor cells and cancer-associated fibroblasts (CAFs) and the impact of their expression on patient outcome was also analyzed. In tumor cells, MCT1 expression was associated with extended overall and progression-free survival and decreased nodal metastasis. Conversely, MCT4 expression in CAFs was associated with shortened survival. In other words, in tumor cells, MCT1 expression is associated with better prognosis and reduced nodal metastasis in pancreatic cancer, contrary to findings of previous studies.

It is noteworthy in this respect that based on the pattern of mutations *SLC16A1*/MCT1 appears to be a tumor suppressor rather than a tumor essential gene in as much as it has a high proportion of truncating mutations. It seems possible that glycolytic tumor cells that must get rid of lactate are selected for increased efflux and decreased influx of lactate and this might be achieved by increased expression of MCT4 and decreased activity of MCT1.

Avitabile M, Succoio M, Testori A, Cardinale A, Vaksman Z, Lasorsa VA, Cantalupo S, Esposito M, Cimmino F, Montella A, Formicola D, Koster J, Andreotti V, et al. Neural crest-derived tumor neuroblastoma and melanoma share 1p13.2 as susceptibility locus that shows a long-range interaction with the *SLC16A1* gene. *Carcinogenesis*. 2019. pii: bgz153.

Chen X, Chen X, Liu F, Yuan Q, Zhang K, Zhou W, Guan S, Wang Y, Mi S, Cheng Y. Monocarboxylate transporter 1 is an independent prognostic factor in esophageal squamous cell carcinoma. *Oncol Rep*. 2019; 41:2529-2539.

Doherty JR, Yang C, Scott KE, Cameron MD, Fallahi M, Li W, Hall MA, Amelio AL, Mishra JK, Li F, Tortosa M, Genau HM, Rounbehler RJ, et al. Blocking lactate export by inhibiting the Myc target MCT1 Disables glycolysis and glutathione synthesis. *Cancer Res*. 2014;74:908-920.

Hong CS, Graham NA, Gu W, Espindola Camacho C, Mah V, Maresh EL, Alavi M, Bagryanova L, Krotee PAL, Gardner BK, Behbahan IS, Horvath S, Chia D, et al. MCT1 Modulates Cancer Cell Pyruvate Export and Growth of Tumors that Co-express MCT1 and MCT4. *Cell Rep*. 2016; 14:1590-1601.

Sukeda A, Nakamura Y, Nishida Y, Kojima M, Gotohda N, Akimoto T, Ochiai A. Expression of Monocarboxylate Transporter 1 Is Associated With Better Prognosis and Reduced Nodal Metastasis in Pancreatic Ductal Adenocarcinoma. *Pancreas*. 2019; 48:1102-1110.

## **Sprouty-related, EVH1 domain-containing protein 1, encoded by the *SPRED1* gene**

The *SPRED1* gene, which encodes a negative regulator of mitogen-activated protein kinase (MAPK) signaling, has been shown to function as a tumor suppressor gene in several types of cancer (Pasmant *et al.*, 2015; Ablain *et al.*, 2018; Sun *et al.*, 2019).

Ablain J, Xu M, Rothschild H, Jordan RC, Mito JK, Daniels BH, Bell CF, Joseph NM, Wu H, Bastian BC, Zon LI, Yeh I. Human tumor genomics and zebrafish modeling identify *SPRED1* loss as a driver of mucosal melanoma. *Science*. 2018;362:1055-1060

Sun J, Zhang J, Wang Y, Li Y, Zhang R. A Pilot Study of Aberrant CpG Island Hypermethylation of *SPRED1* in Acute Myeloid Leukemia. *Int J Med Sci*. 2019; 16:324-330

Pasmant E, Gilbert-Dussardier B, Petit A, de Laval B, Luscan A, Gruber A, Lapillonne H, Deswarte C, Goussard P, Laurendeau I, Uzan B, Pflumio F, Brizard F, et al. *SPRED1*, a RAS MAPK pathway inhibitor that causes Legius syndrome, is a tumour suppressor downregulated in paediatric acute myeloblastic leukaemia. *Oncogene*. 2015; 34:631-638.

## Homeobox protein TGIF1, encoded by the *TGIF1* gene

TGIF binds to a retinoid X receptor (RXR) responsive element from the cellular retinol-binding protein II promoter (CRBP-II-RXRE) and inhibits the 9-cis-retinoic acid-dependent RXR alpha transcription activation of the retinoic acid responsive element.

There is evidence that TGIF1 may function as a tumor suppressor. In pancreatic ductal adenocarcinoma genetic inactivation of *TGIF1* in the context of oncogenic KRASG12D, culminated in the development of highly aggressive and metastatic pancreatic ductal adenocarcinoma (Parajuli *et al.*, 2019; Weng *et al.*, 2019). These authors have found that TGIF1 associates with TWIST1 and inhibits TWIST1 expression and activity, and this function is suppressed in the vast majority of human pancreatic ductal adenocarcinoma by KRASG12D /MAPK-mediated TGIF1 phosphorylation. Ablation of TWIST1 in KRASG12D;TGIF1KO mice blocked pancreatic ductal adenocarcinoma formation, providing evidence that TGIF1 restrains KRASG12D -driven pancreatic ductal adenocarcinoma through its ability to antagonize TWIST1.

The majority of available evidence, however, suggests that the protein plays a cancer promoting role. TGIF1 has been shown to promote the growth and migration of cancer cells in nonsmall cell lung cancer (Xiang *et al.*, 2015). The authors have shown that expression of TGIF1 is elevated in NSCLC tissues, that TGIF1 promoted the growth and migration of cancer cells and that knocking down the expression of *TGIF1* inhibited the growth and migration of NSCLC cells. These studies have also shown that TGIF1 exerted its oncogenic role through beta-catenin/TCF signaling.

Studies on triple negative breast cancer have revealed that high levels of TGIF expression correlate with poor prognosis since TGIF promotes Wnt-driven mammary tumorigenesis. As to the molecular mechanism of the oncogenic role of TGIF: it has been shown that TGIF interacts with and sequesters Axin1 and Axin2 into the nucleus, disassembles the  $\beta$ -catenin-destruction complex leading to the accumulation of  $\beta$ -catenin that activates expression of Wnt target genes (Zhang *et al.*, 2015; Razzaque and Atfi, 2016).

In harmony with an oncogenic role of TGIF in breast cancer, silencing of *TGIF* was found to suppress the migration, invasion and metastasis of the human breast cancer cells in both *in vitro* and *in vivo* experiments (Wang *et al.*, 2018).

*TGIF1* has also been found to be significantly upregulated in some colorectal cancers and to promote adenoma growth in the context of mutant Apc (Shah *et al.*, 2019). Overexpression of



TGIF1 markedly promoted the proliferation of colorectal cancer cells through the activation of Wnt/ $\beta$ -catenin signaling (Wang *et al.*, 2017).

In summary, the majority of data suggest that *TGIF1* may act as an oncogene, despite the fact that the high proportion of truncating indel mutations would indicate a tumor suppressor function. Since the transcription regulator TGIF1 may play both pro-oncogenic and tumor suppressor functions (in different cellular processes) our observation that during tumor evolution selection for truncating mutations appears to dominate for TGIF1 suggests that the selection pressure to eliminate the tumor suppressor activity may override the pressure to preserve its oncogenic activities.

Parajuli P, Singh P, Wang Z, Li L, Eragamreddi S, Ozkan S, Ferrigno O, Prunier C, Razzaque MS, Xu K, Atfi A. TGIF1 functions as a tumor suppressor in pancreatic ductal adenocarcinoma. *EMBO J.* 2019; 38:e101067.

Razzaque MS, Atfi A. TGIF function in oncogenic Wnt signaling. *Biochim Biophys Acta.* 2016; 1865:101-104.

Shah A, Melhuish TA, Fox TE, Frierson HF Jr, Wotton D. TGIF transcription factors repress acetyl CoA metabolic gene expression and promote intestinal tumor growth. *Genes Dev.* 2019; 33:388-402.

Wang JL, Qi Z, Li YH, Zhao HM, Chen YG, Fu W. TGF $\beta$  induced factor homeobox 1 promotes colorectal cancer development through activating Wnt/ $\beta$ -catenin signaling. *Oncotarget.* 2017; 8:70214-70225.

Wang Y, Li L, Wang H, Li J, Yang H. Silencing *TGIF* suppresses migration, invasion and metastasis of MDA-MB-231 human breast cancer cells. *Oncol Rep.* 2018; 39:802-808

Weng CC, Hsieh MJ, Wu CC, Lin YC, Shan YS, Hung WC, Chen LT, Cheng KH. Loss of the transcriptional repressor TGIF1 results in enhanced Kras-driven development of pancreatic cancer. *Mol Cancer.* 2019; 18:96.

Xiang G, Yi Y, Weiwei H, Weiming W. TGIF1 promoted the growth and migration of cancer cells in nonsmall cell lung cancer. *Tumour Biol.* 2015; 36:9303-9310

Zhang MZ, Ferrigno O, Wang Z, Ohnishi M, Prunier C, Levy L, Razzaque M, Horne WC, Romero D, Tzivion G, Colland F, Baron R, Atfi A. TGIF governs a feed-forward network that empowers Wnt signaling to drive mammary tumorigenesis. *Cancer Cell.* 2015; 27:547-560

## **Trinucleotide repeat-containing gene 6B protein, encoded by the *TNRC6B* gene**

*TNRC6B* is a key miRNA-processing gene that plays a role in RNA-mediated gene silencing by both micro-RNAs (miRNAs) and short interfering RNAs (siRNAs). *TNRC6B* is required for miRNA-dependent translational repression and siRNA-dependent endonucleolytic cleavage of complementary mRNAs by argonaute family proteins.

Genomic analysis of liver cancer has identified *TNRC6B* as a significantly mutated gene, suggesting that it may be an important driver gene (Li *et al.*, 2018). Consistent with its putative tumor suppressor role, DNA methylation of *TNRC6B* has been suggested to play a role in early carcinogenesis (Joyce *et al.*, 2018).

Joyce BT, Zheng Y, Zhang Z, Liu L, Kocherginsky M, Murphy R, Achenbach CJ, Musa J, Wehbe F, Just A, Shen J, Vokonas P, Schwartz J, et al. miRNA-Processing Gene Methylation and Cancer Risk. *Cancer Epidemiol Biomarkers Prev.* 2018; 27:550-557.

Li X, Xu W, Kang W, Wong SH, Wang M, Zhou Y, Fang X, Zhang X, Yang H, Wong CH, To KF, Chan SL, Chan MTV, et al. Genomic analysis of liver cancer unveils novel driver genes and distinct prognostic features. *Theranostics.* 2018; 8:1740-1751.

## **Dual specificity protein kinase TTK, encoded by the *TTK* gene**

TTK, capable of phosphorylating serine, threonine, and tyrosine residues of proteins, plays a role in cell proliferation. Although, intuitively the high rate of truncating mutations would suggest a tumor suppressor role for TTK, all the available evidence indicates that it acts as an oncogene.

It has been shown that dual specificity kinase TTK is strongly overexpressed in human pancreatic ductal adenocarcinoma, suggesting a cancer promoting role. In harmony with such a role, following *TTK* knockdown cell proliferation was significantly attenuated whereas apoptosis and necrosis rates were significantly increased. Apoptosis was associated with increased formation of micronuclei, suggesting that loss of TTK results in chromosomal instability and mitotic catastrophe (Kaistha *et al.*, 2014).

Levels of TTK protein were also found to be significantly elevated in neoplastic tissues of liver cancer patients, when compared with adjacent hepatic tissues. In an experimental animal model it was shown that *in vitro* knockdown of *TTK* effectively blocks intrahepatic growth of human hepatic carcinoma cell xenografts, suggesting that targeted TTK inhibition might have clinical utility in the therapy of liver cancer (Miao *et al.*, 2016).

In a recent study dual specificity protein kinase TTK has been identified as the most up-regulated and differentially expressed kinase in glioma stem-like cells that are responsible for tumorigenesis and subsequent tumor recurrence in glioblastoma. TTK expression was highly enriched in glioblastoma and was inversely correlated with a poor prognosis (Wang *et al.*, 2017).

The deubiquitinase USP9X has been implicated in multiple cancers and its oncogenic effects were shown to be exerted at least in part through dual specificity protein kinase TTK (Chen *et al.*, 2018). USP9X was found to stabilize TTK by efficient deubiquitination of the kinase; levels of USP9X and TTK were significantly elevated and positively correlated in tumor tissues, suggesting that the USP9X-TTK axis plays a critical role in carcinogenesis. In harmony with the synergism of these oncogenes, knockdown of *USP9X* or *TTK* inhibited cell proliferation, migration and tumorigenesis.

The explanation for the apparent contradiction of the oncogenic role of TTK and the abundance of truncating mutations in the protein probably lies in the fact that – unlike in the case of typical tumor suppressor genes – mutations are not randomly distributed along the protein sequence. The truncating mutations are practically restricted to the very C-terminal end of the protein (EKKRGKK, residues 851-857), downstream of the catalytic domain and missense mutations also cluster in this C-terminal end. It seems likely that this region is involved in some negative control of the activity of TTK and missense and truncating mutations liberate TTK from this negative control. It is unclear at present whether the mutations affecting this C-terminal motif activate the TTK proto-oncogene by interfering with its ubiquitination or by affecting its subcellular localization.

Chen X, Yu C, Gao J, Zhu H, Cui B, Zhang T, Zhou Y, Liu Q, He H, Xiao R, Huang R, Xie H, Gao D, Zhou H. A novel USP9X substrate TTK contributes to tumorigenesis in non-small-cell lung cancer. *Theranostics*. 2018; 8:2348-2360.

Kaistha BP, Honstein T, Müller V, Bielak S, Sauer M, Kreider R, Fassan M, Scarpa A, Schmees C, Volkmer H, Gress TM, Buchholz M. Key role of dual specificity kinase TTK in proliferation and survival of pancreatic cancer cells. *Br J Cancer*. 2014; 111:1780-1787.

Miao R, Wu Y, Zhang H, Zhou H, Sun X, Csizmadia E, He L, Zhao Y, Jiang C, Miksad RA, Ghaziani T, Robson SC, Zhao H. Utility of the dual-specificity protein kinase TTK as a therapeutic target for intrahepatic spread of liver cancer. *Sci Rep*. 2016; 6:33121.

Wang J, Xie Y, Bai X, Wang N, Yu H, Deng Z, Lian M, Yu S, Liu H, Xie W, Wang M. Targeting dual specificity protein kinase TTK attenuates tumorigenesis of glioblastoma. *Oncotarget*. 2017; 9:3081-3088.

## Zinc finger CCCH domain-containing protein 13, encoded by the *ZC3H13* gene

*ZC3H13* is associated with a complex that mediates N6-methyladenosine (m6A) methylation of RNAs, a modification that plays a role in the efficiency of mRNA splicing and RNA processing. It acts as a key regulator of m6A methylation by promoting m6A methylation of mRNAs at the 3'-UTR. *ZC3H13* has been shown to serve as a tumor suppressor in colorectal cancer (Zhu *et al.*, 2019).

Zhu D, Zhou J, Zhao J, Jiang G, Zhang X, Zhang Y, Dong M. *ZC3H13* suppresses colorectal cancer proliferation and invasion via inactivating Ras-ERK signaling. *J Cell Physiol.* 2019; 234:8899-8907

## mRNA decay activator protein *ZFP36L2*, encoded by the *ZFP36L2* gene

*ZFP36L2* has been selected as a gene characterized by very high values of indel\_rNSM, suggesting positive selection for truncating mutations. Although the closely related *ZFP36L1* gene is not present in the lists defined by the CG\_SO and CG\_SSI lists defined by the 2SD cut-off values, it is also characterized by very high values of rNSM (**Supplementary Table 3**).

*ZFP36L1* and *ZFP36L2* zinc-finger RNA-binding proteins destabilize several cytoplasmic AU-rich element (ARE)-containing mRNA transcripts by promoting their poly(A) tail removal or deadenylation, and hence provide a mechanism for attenuating protein synthesis. The proteins are necessary for thymocyte development and prevention of T-cell acute lymphoblastic leukemia transformation by promoting ARE-mediated mRNA decay of the mRNA of oncogenic factors.

Deletion of the genes *ZFP36L1* and *ZFP36L2* leads to perturbed thymic development and T lymphoblastic leukemia (Hodson *et al.*, 2010).

*ZFP36L1* and *ZFP36L2* play a negative role in cell proliferation. Forced expression of *ZFP36L1* or *ZFP36L2* inhibited cell proliferation in colorectal cancer cell lines, whereas knockdown of these genes increased cell proliferation (Suk *et al.*, 2018). *ZFP36L2* has been validated as an important tumor-suppressor specific to oesophageal squamous cell carcinomas (Lin *et al.*, 2018).

Hodson DJ, Janas ML, Galloway A, Bell SE, Andrews S, Li CM, Pannell R, Siebel CW, MacDonald HR, De Keersmaecker K, Ferrando AA, Grutz G, Turner M. Deletion of the RNA-binding proteins *ZFP36L1* and *ZFP36L2* leads to perturbed thymic development and T lymphoblastic leukemia. *Nat Immunol.* 2010; 11:717-724.

Lin DC, Dinh HQ, Xie JJ, Mayakonda A, Silva TC, Jiang YY, Ding LW, He JZ, Xu XE, Hao JJ, Wang MR, Li C, Xu LY *et al.* Identification of distinct mutational patterns and new driver genes in oesophageal squamous cell carcinomas and adenocarcinomas. *Gut.* 2018; 67:1769-1779.

Suk FM, Chang CC, Lin RJ, Lin SY, Liu SC, Jau CF, Liang YC. *ZFP36L1* and *ZFP36L2* inhibit cell proliferation in a cyclin D-dependent and p53-independent manner. *Sci Rep.* 2018; 8:2742

## Zinc finger protein 276, encoded by the *ZNF276* gene

Zinc finger protein is involved in transcriptional regulation.

It has been suggested that *ZNF276* may be a tumor suppressor in breast cancer progression in colorectal cancers (Wong *et al.*, 2016).

Although such a role would be consistent with positive selection for inactivating mutations, analysis of the distribution of nonsense mutations along the protein sequence suggests

that the high rNSM value is an artifact, rather than a signature of positive selection for inactivating mutations. The high rate of nonsense substitutions vs. sense substitutions is due to the fact that the majority of sequences contain nonsense substitution at a single site (p.Q217\*). Since there is no reason why selection would favor nonsense mutation at a single site it seems more likely that it reflects some sort of data deposition error. It is noteworthy in this respect that all the samples containing the p.Q217\* mutations originate from different regions of pancreatic tumor tissue samples from a single study (Yachida *et al*; 2016).

Wong JC, Gokgoz N, Alon N, Andrulis IL, Buchwald M. Cloning and mutation analysis of ZFP276 as a candidate tumor suppressor in breast cancer. *J Hum Genet.* 2003; 48:668-671.

Yachida S, Wood LD, Suzuki M, Takai E, Totoki Y, Kato M, Luchini C, Arai Y, Nakamura H, Hama N, Elzawahry A, Hosoda F, Shirota T et al. Genomic Sequencing Identifies ELF3 as a Driver of Ampullary Carcinoma. *Cancer Cell.* 2016; 29:229-240.

### **Zinc finger protein 750, encoded by the *ZNF750* Gene**

Zinc finger protein 750 is a transcription factor required for terminal epidermal differentiation, it acts downstream of p63/TP63. Its mutations have been shown to abolish the ability to induce epidermal terminal differentiation. In harmony with its mutation pattern, numerous studies suggest a tumor suppressor role for *ZNF750*.

Analysis of cancer genes across 21 tumor types identified *ZNF750* as a gene harboring many early frameshift and nonsense mutations in head and neck cancer and as the only known gene residing in a small current focal deletion in head and neck and lung squamous cancers (Lawrence *et al.*, 2014). *ZNF750* has also been identified as a tumor suppressor in oral and esophageal squamous cell carcinoma (Yang *et al.*, 2017; Nambara *et al.*, 2017; Hazawa *et al.*, 2017; Otsuka *et al.*, 2018). Studies on the clonal evolution in esophageal squamous cell carcinoma revealed that the majority of driver mutations in this cancer occurred in the tumor-suppressor genes, including *TP53*, *KMT2D* and *ZNF750* (Hao *et al.*, 2016).

Hao JJ, Lin DC, Dinh HQ, Mayakonda A, Jiang YY, Chang C, Jiang Y, Lu CC, Shi ZZ, Xu X, Zhang Y, Cai Y, Wang JW, et al. Spatial intratumoral heterogeneity and temporal clonal evolution in esophageal squamous cell carcinoma. *Nat Genet.* 2016; 48:1500-1507

Hazawa M, Lin DC, Handral H, Xu L, Chen Y, Jiang YY, Mayakonda A, Ding LW, Meng X, Sharma A, Samuel S, Movahednia MM, Wong RW et al. *ZNF750* is a lineage-specific tumour suppressor in squamous cell carcinoma. *Oncogene.* 2017; 36:2243-2254.

Lawrence MS, Stojanov P, Mermel CH, Garraway LA., Golub TR, Meyerson M, Gabriel SB, Lander ES, Getz G. Discovery and saturation analysis of cancer genes across 21 tumor types *Nature.* 2014; 505: 495–501.

Nambara S, Masuda T, Tobo T, Kidogami S, Komatsu H, Sugimachi K, Saeki H, Oki E, Maehara Y, Mimori K. Clinical significance of *ZNF750* gene expression, a novel tumor suppressor gene, in esophageal squamous cell carcinoma. *Oncol Lett.* 2017; 14:1795-1801.

Otsuka R, Akutsu Y, Sakata H, Hanari N, Murakami K, Kano M, Toyozumi T, Takahashi M, Matsumoto Y, Sekino N, Yokoyama M, Okada K, Shiraishi T, et al. *ZNF750* Expression Is a Potential Prognostic Biomarker in Esophageal Squamous Cell Carcinoma. *Oncology.* 2018; 94:142-148

Yang H, Pan L, Xu C, Zhang Y, Li K, Chen S, Zhang B, Liu Z, Wang LX, Chen H. Overexpression of tumor suppressor gene *ZNF750* inhibits oral squamous cell carcinoma metastasis. *Oncol Lett.* 2017;14:5591-5596.

# Novel cancer genes positively selected for missense mutations

## Aurora kinase A, encoded by the *AURKA* gene

*AURKA*, also known as a Breast tumor-amplified kinase, is a mitotic serine/threonine kinase that contributes to the regulation of cell cycle progression. It associates with the centrosome and the spindle microtubules during mitosis and plays a critical role in various mitotic events.

In harmony with the notion that *AURKA*'s mutation pattern reflects a pro-oncogenic role for the protein, elevated expression of *AURKA* has been shown to induce oncogenic phenotypes (Takahahi *et al.*, 2015; Treekitkarnmongkol *et al.*, 2016).

Similarly, the observation that downregulation, inhibition or depletion of *AURKA* reduced viability and invasiveness of cancer cells (Sillars-Hardebol *et al.*, 2012; Li *et al.* 2018; van Gijn *et al.*, 2019) also argues for an oncogenic role of the protein.

Significantly, specific knockdown of *AURKA* in cultured pancreatic cancer cells strongly suppressed *in vitro* cell growth and *in vivo* tumorigenicity (Hata *et al.*, 2005). Recently a novel *AURKA* mutation (V352I) was identified from clinical specimens and it was shown that *AURKA* (V352I)-induced carcinogenesis was earlier and much more severe than wild-type *AURKA*, implying that the V352I mutation may accelerate cancer progression (Su *et al.*, 2019).

Although many *AURKA* mutations were identified in cancer patients, it is noteworthy that there is no evidence for the clustering or 'recurrence' of mutations. The most likely explanation for the lack of clustering of mutations is that since *AURKA* interacts with numerous proteins (e.g. PIFO, GADD45A, AUNIP, NIN, FRY, SIRT2, MYCN, HNRNPU, AAAS, KLHL18, CUL3 and FOXP1) there may be multiple sites where missense mutations affecting these interactions may result in dysregulation of the activity of *AURKA*.

In summary, although all the available experimental information argues for an oncogenic role of *AURKA*, there was no evidence for the clustering of its missense mutations. In our view this observation illustrates that recurrence of missense mutations is not a *sine qua non* criterion of oncogenes.

Recent studies have also revealed that *AURKA* and *TWIST1* are linked in a feedback loop controlling tumorigenesis and metastasis. *AURKA* phosphorylates *TWIST1*, inhibits its ubiquitylation, increases its transcriptional activity and favors its homodimerization. *TWIST1* prevents *AURKA* degradation, thereby triggering a feedback loop. Ablation of either *AURKA* or *TWIST1* completely inhibits epithelial-to-mesenchymal transition, suggesting that inhibition of *AURKA* and *TWIST1* are synergistic in inhibiting tumorigenesis and metastasis (Wang *et al.*, 2017).

Although the *TWIST1* gene is not present in the datasets (**Supplementary Tables 3 and 6**) that contain the metadata for transcripts containing at least 100 confirmed somatic, non polymorphic mutations identified in tumor tissues, inspection of the primary dataset (**Supplementary Table 2**) indicates that it is characterized by very high value of rSMN (**Supplementary Table 3**), indicating strong signature of purifying selection (see section on **Negatively selected genes**) consistent with the view that – in synergism with *AURKA* – it plays an important role in promoting tumorigenesis.

Hata T, Furukawa T, Sunamura M, Egawa S, Motoi F, Ohmura N, Marumoto T, Saya H, Horii A. RNA interference targeting aurora kinase a suppresses tumor growth and enhances the taxane chemosensitivity in human pancreatic cancer cells. *Cancer Res.* 2005; 65:2899-2905

Li X1,2, Xu W1, Kang W3, Wong SH1, Wang M4, Zhou Y4, Fang X4, Zhang X4, Yang H4,5, Wong CH6, To KF3, Chan SL6, Chan MTV7, et al. Genomic analysis of liver cancer unveils novel driver genes and distinct prognostic features. *Theranostics.* 2018; 8:1740-1751.

Sillars-Hardebol AH, Carvalho B, Tijssen M, Beliën JA, de Wit M, Delis-van Diemen PM, Pontén F, van de Wiel MA, Fijneman RJ, Meijer GA. TPX2 and AURKA promote 20q amplicon-driven colorectal adenoma to carcinoma progression. *Gut.* 2012; 61:1568-1575.

Su ZL, Su CW, Huang YL, Yang WY, Sampurna BP, Ouchi T, Lee KL, Wu CS, Wang HD, Yuh CH. A Novel AURKA Mutant-Induced Early-Onset Severe Hepatocarcinogenesis Greater than Wild-Type via Activating Different Pathways in Zebrafish. *Cancers (Basel).* 2019; 11. pii: E927.

Takahashi Y, Sheridan P, Niida A, Sawada G, Uchi R, Mizuno H, Kurashige J, Sugimachi K, Sasaki S, Shimada Y, Hase K, Kusunoki M, Kudo S, et al. The AURKA/TPX2 axis drives colon tumorigenesis cooperatively with MYC. *Ann Oncol.* 2015; 26:935-942.

Treekitkarnmongkol W, Katayama H, Kai K, Sasai K, Jones JC, Wang J, Shen L, Sahin AA, Gagea M, Ueno NT, Creighton CJ, Sen S. Aurora kinase-A overexpression in mouse mammary epithelium induces mammary adenocarcinomas harboring genetic alterations shared with human breast cancer. *Carcinogenesis.* 2016; 37:1180-1189.

van Gijn SE, Wierenga E, van den Tempel N, Kok YP, Heijink AM, Spierings DCJ, Foijer F, van Vugt MATM, Fehrmann RSN. TPX2/Aurora kinase A signaling as a potential therapeutic target in genomically unstable cancer cells. *Oncogene.* 2019; 38:852-867.

Wang J, Nikhil K, Viccaro K, Chang L, Jacobsen M, Sandusky G, Shah K. The Aurora-A-Twist1 axis promotes highly aggressive phenotypes in pancreatic carcinoma. *J Cell Sci.* 2017; 130:1078-1093.

## **Cyclin-dependent kinase 8, encoded by the *CDK8* gene**

The *CDK8* gene is a coactivator involved in regulated gene transcription of nearly all RNA polymerase II-dependent genes.

*CDK8* is a colorectal cancer oncogene that regulates beta-catenin activity. Suppression of *CDK8* expression inhibits proliferation in colon cancer cells characterized by high levels of *CDK8* and beta-catenin hyperactivity (Firestein *et al.*, 2008). *CDK8* has been shown to promote SMAD1-driven epithelial-to-mesenchymal transition through YAP1 recruitment (Serrao *et al.*, 2018). There is a large body of evidence that *CDK8* is a key oncogenic driver in many cancers (Philip *et al.*, 2018). *CDK8* was found to be amplified or overexpressed in many colon cancers and *CDK8* expression correlated with shorter patient survival (Liang *et al.*, 2018).

Firestein R, Bass AJ, Kim SY, Dunn IF, Silver SJ, Guney I, Freed E, Ligon AH, Vena N, Ogino S, Chheda MG, Tamayo P, Finn S et al. *CDK8* is a colorectal cancer oncogene that regulates beta-catenin activity. *Nature.* 2008; 455:547-551.

Liang J, Chen M, Hughes D, Chumanevich AA, Altília S, Kaza V, Lim CU, Kiaris H, Myhre K, Pena MM, Broude EV, Roninson IB. *CDK8* Selectively Promotes the Growth of Colon Cancer Metastases in the Liver by Regulating Gene Expression of TIMP3 and Matrix Metalloproteinases. *Cancer Res.* 2018; 78:6594-6606

Philip S, Kumarasiri M, Teo T, Yu M, Wang S. Cyclin-Dependent Kinase 8: A New Hope in Targeted Cancer Therapy? *J Med Chem.* 2018; 61:5073-5092

Serrao A, Jenkins LM, Chumanevich AA, Horst B, Liang J, Gatz ML, Lee NY, Roninson IB, Broude EV, Myhre K. Mediator kinase *CDK8/CDK19* drives YAP1-dependent BMP4-induced EMT in cancer. *Oncogene.* 2018; 37:4792-4808.

## **Isocitrate dehydrogenase [NAD] subunit beta, mitochondrial, encoded by the *IDH3B* gene**

*IDH3B* plays an essential role in the activity of isocitrate dehydrogenase. The heterodimer composed of the alpha (*IDH3A*) and beta (*IDH3B*) subunits and the heterodimer composed of the alpha (*IDH3A*) and gamma (*IDH3G*) subunits, have significant activity but the

full activity of the heterotetramer (containing two subunits of IDH3A, one of IDH3B and one of IDH3G) requires the assembly of both heterodimers.

Our Pubmed search failed to identify publications with major relevance for the role of *IDH3B* in carcinogenesis. It is noteworthy, however, that the *IDH3B* gene contains recurrent somatic missense mutations at residue R131 that is equivalent with R132 and R140 of the paralogous enzymes, IDH1 and IDH2, respectively, which are affected by recurrent oncogenic missense mutations. These mutations of IDH1 and IDH2 result in loss of normal enzymatic function and the abnormal production of 2-hydroxyglutarate. 2-hydroxyglutarate has been found to inhibit enzymatic function of many alpha-ketoglutarate dependent enzymes, including histone and DNA demethylases, causing widespread epigenetic changes in the genome thereby promoting tumorigenesis. It seems likely that the R131 mutations of IDH3B may contribute to carcinogenesis by a similar mechanism.

### **E3 ubiquitin-protein ligase MARCH7, encoded by the *MARCH7* gene.**

March7 is an E3 ubiquitin-protein ligase, an enzyme that accepts ubiquitin from an E2 ubiquitin-conjugating enzyme and then directly transfers the ubiquitin to targeted substrates.

Several studies support an oncogenic role for the ubiquitin E3 ligase MARCH7. Studies on ovarian tissues have revealed that expression of MARCH7 was higher in ovarian cancer tissues than normal ovarian tissues. Silencing *MARCH7* decreased, whereas ectopic expression of MARCH7 increased cell proliferation, migration and invasion, suggesting that MARCH7 is oncogenic and a potential target for ovarian cancer therapy (Hu *et al.*, 2015). The expression of MARCH7 was significantly higher in cervical cancer tissues than normal cervical tissues, suggesting that this oncogene may also serves as a potential target for cervical cancer therapy (Hu *et al.*, 2018).

The expression level of MARCH7 in endometrial cancer tissues was also found to be significantly higher than that in normal endometrium tissues, suggesting that it may be an oncogenic factor in endometrial cancer (Liu *et al.*, 2019). The oncogenic role of MARCH7 is supported by the fact its knockdown inhibited the invasion and metastasis of endometrial cancer cells *in vitro* and *in vivo*, whereas the opposite effect was observed after overexpressing MARCH7.

Hu J, Meng Y, Zeng J, Zeng B, Jiang X. Ubiquitin E3 Ligase MARCH7 promotes proliferation and invasion of cervical cancer cells through VAV2-RAC1-CDC42 pathway. *Oncol Lett.* 2018; 16:2312-2318.

Hu J, Meng Y, Yu T, Hu L, Mao M. Ubiquitin E3 ligase MARCH7 promotes ovarian tumor growth. *Oncotarget.* 2015; 6:12174-12187.

Liu L, Hu J, Yu T, You S, Zhang Y, Hu L. miR-27b-3p/MARCH7 regulates invasion and metastasis of endometrial cancer cells through Snail-mediated pathway. *Acta Biochim Biophys Sin (Shanghai).* 2019; 51:492-500.

### **GTP-binding protein RIT1, encoded by the *RIT1* gene**

The high value of rMSN reflects primarily the recurrence of substitutions (Met90Ile, Met90Val) of Met90 of RIT1 protein.

RIT1 plays a crucial role in the activation of MAPK signaling cascades that mediate a wide variety of cellular functions, including cell proliferation, survival, and differentiation.

Since the Met90Ile substitution has been shown to result in an increased MAPK-ERK signaling (Aoki *et al.*, 2013; Koenighofer *et al.*, 2016), it is plausible to assume that the high rate of missense mutations reflects positive selection of oncogenic driver mutations.

In harmony with this conclusion, studies on endometrial cancer have revealed that RIT1 mRNA and protein were significantly overexpressed in endometrial cancer cell lines and in endometrial cancer tissues compared to non-cancerous endometrial tissue samples (Xu *et al.*, 2015). Elevated expression of RIT1 was significantly correlated with pathological type and clinical stage. Kaplan-Meier survival analysis indicated that RIT1 expression was associated with poor overall survival of endometrial cancer patients, suggesting that elevated expression of RIT1 may contribute to the progression of endometrial cancer.

In a study of lung adenocarcinoma cases, several somatic mutations (including Met90Ile) were identified in the *RIT1* gene that were found to cluster in a hotspot near the switch II domain of the GTPase protein (Berger *et al.*, 2014). Ectopic expression of these mutated *RIT1* genes was found to induce cellular transformation *in vitro* and *in vivo*, confirming that these substitutions are driver mutations and that *RIT1* is an oncogene in lung adenocarcinoma.

Aoki Y, Niihori T, Banjo T, Okamoto N, Mizuno S, Kurosawa K, Ogata T, Takada F, Yano M, Ando T, Hoshika T, Barnett C, Ohashi H, et al. Gain-of-function mutations in RIT1 cause Noonan syndrome, a RAS/MAPK pathway syndrome. *Am. J. Hum. Genet.* 2013; 93:173-180

Berger AH, Imielinski M, Duke F, Wala J, Kaplan N, Shi GX, Andres DA, Meyerson M. Oncogenic RIT1 mutations in lung adenocarcinoma. *Oncogene.* 2014; 33:4418-4423.

Koenighofer M, Hung CY, McCauley JL, Dallman J, Back EJ, Mihalek I, Gripp KW, Sol-Church K, Rusconi P, Zhang Z, Shi GX, Andres DA, Bodamer OA. Mutations in RIT1 cause Noonan syndrome - additional functional evidence and expanding the clinical phenotype. *Clin. Genet.* 2016; 89:359-366

Xu F, Sun S, Yan S, Guo H, Dai M, Teng Y. Elevated expression of RIT1 correlates with poor prognosis in endometrial cancer. *Int J Clin Exp Pathol.* 2015; 8:10315-10324.

## **Yes-associated protein 1, encoded by the *YAP1* gene**

Yes-associated protein 1 is known to be the critical downstream regulatory target in the Hippo signaling pathway that plays a pivotal role in tumor suppression by restricting proliferation and promoting apoptosis. This pathway is composed of a kinase cascade that eventually inactivates YAP1 since phosphorylation of YAP1 by the tumor suppressors LATS1/2 inhibits its translocation into the nucleus.

Several lines of evidence indicate that YAP1 is an oncogene. *YAP1* was found to act as oncogenic target of 11q22 amplification in multiple cancer subtypes, whereas *YAP1* silencing significantly decreases cell proliferation (Lorenzetto *et al.*, 2014; Hamanaka *et al.*, 2019). *YAP1* was shown to promote growth of prostate cancer, whereas knock down of its expression or inhibition of YAP1 function significantly suppressed tumor recurrence (Jiang *et al.*, 2017). The key role of YAP1 in carcinogenesis is also supported by the fact that the tumor suppressor LATS2 inhibits the malignant behaviors of glioma cells by inactivating of YAP1 (Shi *et al.*, 2019).

Although several *YAP1* mutations were identified in cancer patients, there is no evidence for the clustering or ‘recurrence’ of mutations. Similarly to the case of AURKA (see above), the most plausible explanation for the lack of clustering of mutations of this oncogene is that since YAP1 interacts with several proteins (e.g. YES kinase, LATS1, LATS2, TP73, RUNX1, WBP1, WBP2, TEAD1, TEAD2, TEAD3, TEAD4, HCK, MAPK8, MAPK9, CK1, ABL1) mutations at



several different sites may affect these interactions and may result in dysregulation of the activity of YAP1. In our view the cases of AURKA, YAP1 and YES1 illustrate that recurrence of missense mutations is not a *sine qua non* criterion of oncogenes.

Hamanaka N, Nakanishi Y, Mizuno T, Horiguchi-Takei K, Akiyama N, Tanimura H, Hasegawa M, Satoh Y, Tachibana Y, Fujii T, Sakata K, Ogasawara K, Ebiike H, et al. YES1 is a targetable oncogene in cancers harboring YES1 gene amplification. *Cancer Res.* 2019; 79:5734-5745.

Jiang N, Ke B, Hjort-Jensen K, Iglesias-Gato D, Wang Z, Chang P, Zhao Y, Niu X, Wu T, Peng B, Jiang M, Li X, Shang Z, et al. YAP1 regulates prostate cancer stem cell-like characteristics to promote castration resistant growth. *Oncotarget.* 2017; 8:115054-115067.

Lorenzetto E, Brenca M, Boeri M, Verri C, Piccinin E, Gasparini P, Facchinetti F, Rossi S, Salvatore G, Massimino M, Sozzi G, Maestro R, Modena P. YAP1 acts as oncogenic target of 11q22 amplification in multiple cancer subtypes. *Oncotarget.* 2014; 5:2608-2621.

Shi Y, Geng D, Zhang Y, Zhao M, Wang Y, Jiang Y, Yu R, Zhou X. LATS2 Inhibits Malignant Behaviors of Glioma Cells via Inactivating YAP. *J Mol Neurosci.* 2019; 68:38-48.

## Tyrosine-protein kinase Yes, encoded by the YES1 gene

Tyrosine-protein kinase Yes (also known as proto-oncogene c-Yes) is a multidomain non-receptor protein tyrosine kinase containing an SH3 domain, an SH2 domain and a protein kinase domain. YES1 is involved in the regulation of cell growth and survival, apoptosis, cell-cell adhesion, cytoskeleton remodeling, and differentiation. It plays a role in cell cycle progression by phosphorylating the cyclin-dependent kinase 4/CDK4 thus regulating the G1 phase. YES1 has been shown to phosphorylate YAP1, leading to the localization of a YAP1-TBX- $\beta$ -catenin complex to the promoters of antiapoptotic genes, thereby promoting carcinogenesis (Rosenbluh *et al.*, 2012). A small-molecule inhibitor of YES1 impeded the proliferation of  $\beta$ -catenin-dependent cancers in both cell lines and animal models.

Several lines of evidence have established an oncogenic role for YES1.

It has been demonstrated recently that YES1 is essential for lung cancer growth and progression in non-small cell lung cancer, suggesting that it is a promising therapeutic target in lung cancer. YES1 overexpression induced metastatic spread in preclinical *in vivo* models, whereas YES1 genetic depletion by CRISPR/Cas9 technology significantly reduced tumor growth and metastasis (Garmendia *et al.*, 2019).

In harmony with an oncogenic role of YES1, several microRNAs have been shown to inhibit the proliferation of tumor cells by targeting YES1 (Tan, Lim and Tan, 2015; Shen *et al.*, 2019; Zhao *et al.*, 2020).

The oncogenic role of YES1 in cancer is also supported by the observation that it is amplified in several types of cancer, suggesting that it could be an attractive target for a cancer drug (Fan *et al.*, 2018; Hamanaka *et al.*, 2019). Hamanaka *et al.*, (2019) have generated a YES1 kinase inhibitor, and have shown that YES1 kinase inhibition by this drug led to antitumor activity against YES1-amplified cancers *in vitro* and *in vivo*. The authors have also shown that Yes-associated protein 1 (YAP1) played a role downstream of YES1 and contributed to the growth of YES1-amplified cancers, indicating that the regulation of YAP1 by YES1 plays an important role in YES1-amplified cancers. These findings identify YES1 as a targetable oncogene of significant potential for clinical utility (Rai, 2019).

Although YES1 contains an increased proportion of nonsynonymous mutations there is no evidence for the clustering or 'recurrence' of mutations. Similarly to the cases of AURKA and YAP1 (see above), the most plausible explanation for the lack of clustering of mutations of this

oncogene is that since YES1 is a multidomain protein that interacts with several proteins, mutations at several different sites may affect these interactions and may result in dysregulation of the activity of YAP1. In our view the cases of AURKA, YAP1 and YES1 illustrate that recurrence of missense mutations is not a *sine qua non* criterion of oncogenes.

Fan PD, Narzisi G, Jayaprakash AD, Venturini E, Robine N, Smibert P, Germer S, Yu HA, Jordan EJ, Paik PK, Janjigian YY, Chaff JE, Wang L et al. YES1 amplification is a mechanism of acquired resistance to EGFR inhibitors identified by transposon mutagenesis and clinical genomics. *Proc Natl Acad Sci U S A*. 2018; 115:E6030-E6038.

Garmendia I, Pajares MJ, Hermida-Prado F, Ajona D, Bértolo C, Sainz C, Lavín A, Remírez AB, Valencia K, Moreno H, Ferrer I, Behrens C, Cuadrado M et al. YES1 Drives Lung Cancer Growth and Progression and Predicts Sensitivity to Dasatinib. *Am J Respir Crit Care Med*. 2019; 200:888-899.

Hamanaka N, Nakanishi Y, Mizuno T, Horiguchi-Takei K, Akiyama N, Tanimura H, Hasegawa M, Satoh Y, Tachibana Y, Fujii T, Sakata K, Ogasawara K, Ebiike H et al. YES1 Is a Targetable Oncogene in Cancers Harboring YES1 Gene Amplification. *Cancer Res*. 2019; 79:5734-5745.

Rai K. Personalized Cancer Therapy: YES1 Is the New Kid on the Block. *Cancer Res*. 2019; 79:5702-5703.

Rosenbluh J, Nijhawan D, Cox AG, Li X, Neal JT, Schafer EJ, Zack TI, Wang X, Tsherniak A, Schinzel AC, Shao DD, Schumacher SE, Weir BA et al.  $\beta$ -Catenin-driven cancers require a YAP1 transcriptional complex for survival and tumorigenesis. *Cell*. 2012; 151:1457-1473.

Shen Y, Chen F, Liang Y. MicroRNA-133a inhibits the proliferation of non-small cell lung cancer by targeting YES1. *Oncol Lett*. 2019; 18:6759-6765.

Tan W, Lim SG, Tan TM. Up-regulation of microRNA-210 inhibits proliferation of hepatocellular carcinoma cells by targeting YES1. *World J Gastroenterol*. 2015; 21:13030-13041.

Zhao S, Jie C, Xu P, Diao Y. MicroRNA-140 inhibit prostate cancer cell invasion and migration by targeting YES proto-oncogene 1. *J Cell Biochem*. 2020;121:482-488.

## Negatively selected tumor essential genes

### Atypical chemokine receptor 3, encoded by the *ACKR3* (*CXCR7*) gene

*ACKR3* is a member of the group of chemokine receptors that acts as a receptor for chemokines CXCL11 and CXCL12/SDF1. It is activated by CXCL11 in malignant hemapoietic cells, leading to phosphorylation of ERK1/2 (MAPK3/MAPK1) and enhanced cell adhesion and migration.

*ACKR3* is a known cancer gene, from Tier 1 of the Cancer Gene Census; it has a cancer hallmark annotation. Its importance in carcinogenesis is underlined by the fact that high expression of *ACKR3* is associated with poor survival in several types of cancer.

As to the role of *ACKR3* in hallmarks of cancer: it has been suggested that *ACKR3* promotes proliferative signaling, angiogenesis, evasion of programmed cell death and invasion and metastasis.

Several studies support the key role of *ACKR3* in tumor invasion and metastasis (Li *et al.*, 2014; Stacer *et al.*, 2016; Zhao *et al.*, 2017; Puddinu *et al.*, 2017; Melo *et al.*, 2018; Qian *et al.*, 2018). Since knock-down or pharmacological inhibition of *ACKR3* has been shown to reduce tumor invasion and metastasis, *ACKR3* is a promising therapeutic target for the control of tumor dissemination.

Li XX, Zheng HT1, Huang LY, Shi DB, Peng JJ, Liang L, Cai SJ. Silencing of *CXCR7* gene represses growth and invasion and induces apoptosis in colorectal cancer through ERK and  $\beta$ -arrestin pathways. *Int J Oncol*. 2014; 45:1649-5167

Melo RCC, Ferro KP, Duarte ADSS, Olalla Saad ST. CXCR7 participates in CXCL12-mediated migration and homing of leukemic and normal hematopoietic cells. *Stem Cell Res Ther*. 2018; 9:34.

Puddinu V, Casella S, Radice E, Thelen S, Dimhofer S, Bertoni F, Thelen M. ACKR3 expression on diffuse large B cell lymphoma is required for tumor spreading and tissue infiltration. *Oncotarget*. 2017; 8:85068-85084.

Qian T, Liu Y, Dong Y, Zhang L, Dong Y, Sun Y, Sun D. CXCR7 regulates breast tumor metastasis and angiogenesis in vivo and in vitro. *Mol Med Rep*. 2018; 17:3633-3639.

Stacer AC, Fenner J, Cavnar SP, Xiao A, Zhao S, Chang SL, Salomonson A, Luker KE, Luker GD. Endothelial CXCR7 regulates breast cancer metastasis. *Oncogene*. 2016; 35:1716-1724.

Zhao ZW, Fan XX, Song JJ, Xu M, Chen MJ, Tu JF, Wu FZ, Zhang DK, Liu L, Chen L, Ying XH, Ji JS. ShRNA knock-down of CXCR7 inhibits tumour invasion and metastasis in hepatocellular carcinoma after transcatheter arterial chemoembolization. *J Cell Mol Med*. 2017; 21:1989-1999.

### **CX3C chemokine receptor 1, encoded by the *CX3CR1* gene**

CX3CR1 is a member of the group of chemokine receptors that play a major role in tumor metastasis. The interactions of chemokines, also known as chemotactic cytokines, with their receptors regulate immune and inflammatory responses. However, recent studies have demonstrated that cancer cells subvert the normal chemokine role, transforming them into fundamental constituents of the tumor microenvironment with tumor-promoting effects. CX3CR1 is the receptor for the CX3C chemokine fractalkine (CX3CL1) that mediates both its adhesive and migratory functions.

CX3CR1 expression has been shown to be associated with the process of cellular migration *in vitro* and tumor metastasis of clear cell renal cell carcinoma *in vivo* (Yao *et al.*, 2014).

Recent studies indicate that tumor-associated macrophages M $\Phi$  can influence cancer progression and metastasis and that CCR2 and CX3CR1 play important roles in metastasis. Schmall *et al.* (2015) have shown that coculturing of tumor-associated macrophages with mouse Lewis lung carcinoma caused up-regulation of CCR2/CCL2 and CX3CR1/CX3CL1 in both the cancer cells and the macrophages. *In vivo*, M $\Phi$  depletion and genetic ablation of CCR2 and CX3CR1 all inhibited LLC1 tumor growth and metastasis, and enhanced survival. Furthermore, mice treated with CCR2 antagonist mimicked genetic ablation of CCR2, showing reduced tumor growth and metastasis. These findings indicate that tumor-associated M $\Phi$  plays a central role in lung cancer growth and metastasis, with bidirectional cross-talk between M $\Phi$  and cancer cells via CCR2 and CX3CR1 signaling. These studies suggest that the therapeutic strategy of blocking CCR2 and CX3CR1 may prove beneficial for halting metastasis.

CX3CR1 is highly expressed in gastric cancer tissues and is related to lymph node metastasis and larger tumor size. CX3CR1 overexpression promoted gastric cancer cell migration, invasion, proliferation and survival (Wei *et al.*, 2015).

CX3CR1 is overexpressed in human breast tumors and cancer cells utilize the chemokine receptor CX3CR1 to exit the blood circulation and metastasize to the skeleton. To assess the clinical potential of targeting CX3CR1 in breast cancer Shen *et al.*, (2016) have used neutralizing antibody for this receptor, transcriptional suppression by CRISPR interference as well as a potent and selective small-molecule antagonist of CX3CR1 in preclinical animal models of metastasis. The authors have found that inactivation of CX3CR1 impairs the lodging

of circulating tumor cells to the skeleton and impairs further growth of established metastases. These data suggest that CX3CR1 has an important role in promoting metastasis activity and that CX3CR1 antagonists may be valuable as drugs of tumor therapy.

Schmall A, Al-Tamari HM, Herold S, Kampschulte M, Weigert A, Wietelmann A, Vipotnik N, Grimminger F, Seeger W, Pullamsetti SS, Savai R. Macrophage and cancer cell cross-talk via CCR2 and CX3CR1 is a fundamental mechanism driving lung cancer. *Am J Respir Crit Care Med.* 2015; 191:437-447.

Shen F, Zhang Y, Jernigan DL, Feng X, Yan J, Garcia FU, Meucci O, Salvino JM, Fatatis A. Novel Small-Molecule CX3CR1 Antagonist Impairs Metastatic Seeding and Colonization of Breast Cancer Cells. *Mol Cancer Res.* 2016; 14:518-527.

Wei LM, Cao S, Yu WD, Liu YL, Wang JT. Overexpression of CX3CR1 is associated with cellular metastasis, proliferation and survival in gastric cancer. *Oncol Rep.* 2015; 33:615-624.

Yao X, Qi L, Chen X, Du J, Zhang Z, Liu S. Expression of CX3CR1 associates with cellular migration, metastasis, and prognosis in human clear cell renal cell carcinoma. *Urol Oncol.* 2014; 32:162-170.

### **C-C chemokine receptor type 2, encoded by the *CCR2* gene C-C chemokine receptor type 5, encoded by the *CCR5* gene**

Although the *CCR2* gene of C-C chemokine receptor type 2 and the *CCR5* gene of C-C chemokine receptor type 5 are not present in the CG\_SO and CG\_SSI lists defined by the 2SD cut-off values they are also characterized by very high values of rSNM (**Supplementary Table 3**), suggesting that they may also play important roles in tumor metastasis.

CCR2 is the key functional receptor for the chemokine ligand CCL2. Its binding with CCL2 on monocytes and macrophages mediates chemotaxis and migration induction. Recent studies indicate that CCR2 and CX3CR1 play important roles in metastasis (Schmall *et al.* 2015). The CCL2-CCR2 signaling axis has generated increasing interest in recent years due to its association with the progression of cancer. The CCL2-CCR2, signaling pair has been shown to have multiple pro-tumorigenic roles, mediating tumor growth and angiogenesis (Lim *et al.*, 2016).

CCR5 serves as a receptor for a number of inflammatory CC-chemokines including CCL3/MIP-1-alpha, CCL4/MIP-1-beta. Recent studies have revealed that C-C chemokine receptor type 5 plays a key role in progression of tumorigenesis. Expression of CCR5 augments regulatory T cell differentiation and migration to sites of inflammation. The misexpression of CCR5 in epithelial cells, induced upon oncogenic transformation, hijacks this migratory phenotype (Aldinucci and Casagrande, 2018; Jiao *et al.*, 2019).

Aldinucci D, Casagrande N. Inhibition of the CCL5/CCR5 Axis against the Progression of Gastric Cancer. *Int J Mol Sci.* 2018; 19. pii: E1477.

Jiao X, Nawab O, Patel T, Kossenkov AV, Halama N, Jaeger D, Pestell RG. Recent Advances Targeting CCR5 for Cancer and Its Role in Immuno-Oncology. *Cancer Res.* 2019; 79:4801-4807.

Lim SY, Yuzhalin AE, Gordon-Weeks AN, Muschel RJ. Targeting the CCL2-CCR2 signaling axis in cancer metastasis. *Oncotarget.* 2016; 7:28697-28710.

Schmall A, Al-Tamari HM, Herold S, Kampschulte M, Weigert A, Wietelmann A, Vipotnik N, Grimminger F, Seeger W, Pullamsetti SS, Savai R. Macrophage and cancer cell cross-talk via CCR2 and CX3CR1 is a fundamental mechanism driving lung cancer. *Am J Respir Crit Care Med.* 2015; 191:437-447

### **Dentin sialophosphoprotein, encoded by the *DSPP* gene**

The *DSPP* gene has been selected as a gene showing very high values of rSMN, suggesting negative selection of missense and nonsense mutations (**Supplementary Table 3**). It must be pointed out that based on the high silent/missense ratio *DSPP* has also been identified by others as a gene showing signs of strong negative selection (Zhou *et al.*, 2017).

Dentin sialophosphoprotein is a secreted protein that has been shown to play an important role in dentinogenesis. It binds high amount of calcium and facilitates initial mineralization of dentin matrix collagen as well as regulate the size and shape of the crystals, therefore it seemed surprising that its gene would qualify as a negatively selected tumor essential gene.

There is evidence in the scientific literature that the protein may have a tumorigenic role in oral cancer (Chaplet *et al.*, 2006; Johi *et al.*, 2010; Saxena *et al.*, 2015; Gkouveris *et al.*, 2018; Nikitakis *et al.*, 2018). Nevertheless, the high silent to missense rate is not a reflection of the importance of *DSPP* for carcinogenesis. The *DSPP* gene contains a 2-kb repeat domain containing over 200 tandem copies of a nominal 9-basepair (AGC AGC GAC) repeat encoding a series of tandem Ser-Ser-Asp repeats and the unusually high rate of silent mutations is restricted to this region of the gene.

A study of 188 normal human chromosomes revealed that the repeat domain of *DSPP* is hypervariable with extraordinary rates of change including slip-replication indel events and predominantly C-to-T transition SNPs (McKnight *et al.*, 2008). In harmony with the increased rate and predominance of C-to-T transition in the AGC AGC GAC (Ser-Ser-Asp) repeats, the vast majority of substitutions in this repeat region of the *DSPP* gene are silent. The unusually high silent to missense mutation ratio of the *DSPP* gene is thus not due to purifying selection of a tumor essential gene.

Chaplet M, Waltregny D, Detry C, Fisher LW, Castronovo V, Bellahcène A. Expression of dentin sialophosphoprotein in human prostate cancer and its correlation with tumor aggressiveness. *Int J Cancer*. 2006; 118:850-856.

Gkouveris I, Nikitakis NG, Aseervatham J, Ogbureke KUE. The tumorigenic role of DSPP and its potential regulation of the unfolded protein response and ER stress in oral cancer cells. *Int J Oncol*. 2018; 53:1743-1751.

Joshi R, Tawfik A, Edeh N, McCloud V, Looney S, Lewis J, Hsu S, Ogbureke KU. Dentin sialophosphoprotein (DSPP) gene-silencing inhibits key tumorigenic activities in human oral cancer cell line, OSC2. *PLoS One*. 2010; 5:e13974.

McKnight DA, Suzanne Hart P, Hart TC, Hartsfield JK, Wilson A, Wright JT, Fisher LW. A comprehensive analysis of normal variation and disease-causing mutations in the human DSPP gene. *Hum Mutat*. 2008; 29:1392-404.

Nikitakis NG, Gkouveris I, Aseervatham J, Barahona K, Ogbureke KUE. DSPP-MMP20 gene silencing downregulates cancer stem cell markers in human oral cancer cells. *Cell Mol Biol Lett*. 2018; 23:30.

Saxena G, Koli K, de la Garza J, Ogbureke KU. Matrix metalloproteinase 20-dentin sialophosphoprotein interaction in oral cancer. *J Dent Res*. 2015; 94:584-593.

Zhou Z, Zou Y, Liu G, Zhou J, Wu J, Zhao S, Su Z, Gu X. Mutation-profile-based methods for understanding selection forces in cancer somatic mutations: a comparative analysis. *Oncotarget*. 2017;8:58835-58846.

## **Forkhead box protein G1, encoded by the *FOXG1***

FOXG1 is a member of the FOX (Forkhead box) protein family of transcription factors that play important roles in regulating the expression of genes involved in cell growth, proliferation, differentiation and longevity. FOXG1 localizes to mitochondria and coordinates cell differentiation and bioenergetics (Pancrazi *et al.*, 2015).

The tumor promoting role of FOXG1 is supported by the observation that childhood medulloblastomas are characterized by 2-7-fold copy gain for *FOXG1*. *FOXG1* copy gain (>2 to

21 folds) was seen in 93% of a validating set of tumors and showed a positive correlation with protein expression (Adesina *et al.*, 2007).

The oncogenic role of FOXG1 is also supported by the observation that a decrease of FOXG1 in medulloblastoma cells offers a survival advantage in mice (Adesina *et al.*, 2015), whereas high expression of FOXG1 was associated with poor survival of glioblastoma patients (Robertson *et al.*, 2015).

The carcinogenesis promoting activity of FOXG1 is supported by the observation that endogenous FOXG1 expression levels were positively correlated to the glioblastoma multiforme disease progression (Wang *et al.*, 2018). Overexpression of FOXG1 protein resulted in increased cell viability, and it was suggested that FOXG1 functions as an onco-factor by promoting proliferation and inhibiting differentiation.

Recent studies on glioblastoma have shown that transcription factors FOXG1 and TLE1 promote glioblastoma propagation by supporting maintenance of brain tumor-initiating cells (Dali *et al.*, 2018). Since the expressions of caspase family members were significantly altered in response to change of FOXG1 expression, it has been suggested that FOXG1 also contributes to carcinogenesis as a negative regulator of glioma cell apoptosis (Chen *et al.*, 2018).

Adesina AM, Nguyen Y, Mehta V, Takei H, Stangeby P, Crabtree S, Chintagumpala M, Gumerlock MK. FOXG1 dysregulation is a frequent event in medulloblastoma. *J Neurooncol.* 2007; 85:111-122.

Adesina AM, Veo BL, Courteau G, Mehta V, Wu X, Pang K, Liu Z, Li XN, Peters L. FOXG1 expression shows correlation with neuronal differentiation in cerebellar development, aggressive phenotype in medulloblastomas, and survival in a xenograft model of medulloblastoma. *Hum Pathol.* 2015; 46:1859-1871.

Chen J, Wu X, Xing Z, Ma C, Xiong W, Zhu X, He X. FOXG1 Expression Is Elevated in Glioma and Inhibits Glioma Cell Apoptosis. *J Cancer.* 2018; 9:778-783.

Dali R, Verginelli F, Pramatarova A, Sladek R, Stifani S. Characterization of a FOXG1:TLE1 transcriptional network in glioblastoma-initiating cells. *Mol Oncol.* 2018; 12:775-787

Pancrazi L, Di Benedetto G, Colombaioni L, Della Sala G, Testa G, Olimpico F, Reyes A, Zeviani M, Pozzan T, Costa M. Foxg1 localizes to mitochondria and coordinates cell differentiation and bioenergetics. *Proc Natl Acad Sci U S A.* 2015; 112:13910-13915.

Robertson E, Perry C, Doherty R, Madhusudan S. Transcriptomic profiling of Forkhead box transcription factors in adult glioblastoma multiforme. *Cancer Genomics Proteomics.* 2015; 12:103-112.

Wang L, Wang J, Jin T, Zhou Y, Chen Q. FoxG1 facilitates proliferation and inhibits differentiation by downregulating FoxO/Smad signaling in glioblastoma. *Biochem Biophys Res Commun.* 2018; 504:46-53.

## Forkhead box protein P2, encoded by *FOXP2* gene

Forkhead box protein P2 (FOXP2) is a transcriptional repressor.

The role of FOXP2 in cancer is somewhat controversial; it appears to have oncogenic or tumor suppressor roles, depending on the cellular and histological features of tumors. While FOXP2 has been found to be down-regulated in breast cancer, hepatocellular carcinoma and gastric cancer biopsies, overexpressed FOXP2 has been reported in multiple myelomas, several subtypes of lymphomas, as well as in neuroblastomas and some prostate cancers (Herrero *et al.*, 2018).

Numerous recent studies indicate a tumor suppressor like role for FOXP2 (Campbell *et al.*, 2010; Cuiffo *et al.*, 2014; Yan *et al.*, 2015; Diao *et al.*, 2018; Song *et al.*, 2017; Chen *et al.*, 2018; Li *et al.*, 2019), others present evidence for an oncogene-like role of the protein (Campbell *et al.*, 2010; Zhong *et al.*, 2017; Wu *et al.*, 2018; Wang *et al.*, 2019).

The high silent to missense ratio of substitution mutations observed in the case of the *FOXP2* gene does not seem to be a reflection of purifying selection that might be in harmony of an oncogene-like role, but definitely not with a tumor suppressor role.

The translated region of the *FOXP2* gene contains a long stretch of CAG repeats (residues 177-216), corresponding to the polyQ segment of the protein. Silent mutations are clustered in the polyQ tract of the protein encoded by the imperfect polymorphic region, suggesting that the increased silent to missense rate of substitutions in this gene has much less to do with purifying selection than with microsatellite instability.

Campbell AJ, Lyne L, Brown PJ, Launchbury RJ, Bignone P, Chi J, Roncador G, Lawrie CH, Gatter KC, Kusec R, Banham AH. Aberrant expression of the neuronal transcription factor FOXP2 in neoplastic plasma cells. *Br J Haematol.* 2010; 149:221–230.

Chen MT, Sun HF, Li LD, Zhao Y, Yang LP, Gao SP, Jin W. Downregulation of FOXP2 promotes breast cancer migration and invasion through TGF $\beta$ /SMAD signaling pathway. *Oncol Lett.* 2018; 15:8582-8588.

Cuiffo BG, Campagne A, Bell GW, Lembo A, Orso F, Lien EC, Bhasin MK, Raimo M, Hanson SE, Marusyk A, El-Ashry D, Hematti P, Polyak K, et al. MSC-regulated microRNAs converge on the transcription factor FOXP2 and promote breast cancer metastasis. *Cell Stem Cell.* 2014; 15:762–774.

Diao H, Ye Z, Qin R. miR-23a acts as an oncogene in pancreatic carcinoma by targeting FOXP2. *J Investig Med.* 2018;66: 676-683.

Herrero MJ, Gitton Y. The untold stories of the speech gene, the FOXP2 cancer gene. *Genes Cancer.* 2018; 9:11-38

Li ZY, Zhang ZZ, Bi H, Zhang QD, Zhang SJ, Zhou L, Zhu XQ, Zhou J. Upregulated microRNA- 671- 3p promotes tumor progression by suppressing forkhead box P2 expression in non- small- cell lung cancer. *Mol Med Rep.* 2019; 20:3149-3159.

Song XL, Tang Y, Lei XH, Zhao SC, Wu ZQ. miR-618 Inhibits Prostate Cancer Migration and Invasion by Targeting FOXP2. *J Cancer.* 2017; 8:2501-2510.

Wang WX, Yu HL, Liu X. MiR-9-5p suppresses cell metastasis and epithelial-mesenchymal transition through targeting FOXP2 and predicts prognosis of colorectal carcinoma. *Eur Rev Med Pharmacol Sci.* 2019; 23:6467-6477.

Wu J, Liu P, Tang H, Shuang Z, Qiu Q, Zhang L, Song C, Liu L, Xie X, Xiao X. FOXP2 Promotes Tumor Proliferation and Metastasis by Targeting GRP78 in Triple-negative Breast Cancer. *Curr Cancer Drug Targets.* 2018; 18:382-389.

Yan X, Zhou H, Zhang T, Xu P, Zhang S, Huang W, Yang L, Gu X, Ni R, Zhang T. Downregulation of FOXP2 promoter human hepatocellular carcinoma cell invasion. *Tumor Biol.* 2015; 36:9611–9619.

Zhong C, Liu J, Zhang Y, Luo J, Zheng J. MicroRNA-139 inhibits the proliferation and migration of osteosarcoma cells via targeting forkhead-box P2. *Life Sci.* 2017; 191:68-73.

## Glucose-6-phosphate 1-dehydrogenase, encoded by the *G6PD* gene

Glucose-6-phosphate 1-dehydrogenase catalyzes the rate-limiting step of the oxidative pentose-phosphate pathway; its main function is to provide reducing power (NADPH) and pentose phosphates for fatty acid and nucleic acid synthesis. There is strong support for the importance of G6PD for tumor growth. Progression of tumor cells to more aggressive phenotypes requires not only the upregulation of glycolysis but also the pentose phosphate pathway as a provider of reducing power and ribose phosphate to the cell for maintenance of redox balance and biosynthesis of nucleotides and lipids, making G6PD a promising target in cancer therapy (Zhang *et al.*, 2014).

The key importance of G6PD for tumor growth is supported by the fact that elevated G6PD levels promote cancer progression in numerous tumor types, that high G6PD expression is a poor prognostic factor and that knockdown of G6PD suppresses cell viability and growth

(Wang *et al.*, 2012; Pu *et al.*, 2015; Wang *et al.*, 2015; Poulain *et al.*, 2017; Chen *et al.*, 2018; Yang *et al.*, 2018; Barajas *et al.*, 2018; Yang *et al.*, 2019).

Barajas JM, Reyes R, Guerrero MJ, Jacob ST, Motiwala T, Ghoshal K. The role of miR-122 in the dysregulation of glucose-6-phosphate dehydrogenase (G6PD) expression in hepatocellular cancer. *Sci Rep.* 2018; 8:9105.

Chen X, Xu Z, Zhu Z, Chen A, Fu G, Wang Y, Pan H, Jin B. Modulation of G6PD affects bladder cancer via ROS accumulation and the AKT pathway in vitro. *Int J Oncol.* 2018; 53:1703-1712.

Poulain L, Sujobert P, Zylbersztejn F, Barreau S, Stuani L, Lambert M, Palama TL, Chesnais V, Birsén R, Vergez F, Farge T, Chenevier-Gobeaux C, Fraisse M, et al. High mTORC1 activity drives glycolysis addiction and sensitivity to G6PD inhibition in acute myeloid leukemia cells. *Leukemia.* 2017; 31:2326-2335.

Pu H, Zhang Q, Zhao C, Shi L, Wang Y, Wang J, Zhang M. Overexpression of G6PD is associated with high risks of recurrent metastasis and poor progression-free survival in primary breast carcinoma. *World J Surg Oncol.* 2015; 13:323.

Wang J, Yuan W, Chen Z, Wu S, Chen J, Ge J, Hou F, Chen Z. Overexpression of G6PD is associated with poor clinical outcome in gastric cancer. *Tumour Biol.* 2012; 33:95-101.

Wang X, Li X, Zhang X, Fan R, Gu H, Shi Y, Liu H. Glucose-6-phosphate dehydrogenase expression is correlated with poor clinical prognosis in esophageal squamous cell carcinoma. *Eur J Surg Oncol.* 2015; 41:1293-1299.

Yang CA, Huang HY, Lin CL, Chang JG. G6PD as a predictive marker for glioma risk, prognosis and chemosensitivity. *J Neurooncol.* 2018; 139:661-670.

Yang HC, Wu YH, Yen WC, Liu HY, Hwang TL, Stern A, Chiu DT. The Redox Role of G6PD in Cell Growth, Cell Death, and Cancer. *Cells.* 2019;8. pii: E1055.

Zhang C, Zhang Z, Zhu Y, Qin S. Glucose-6-phosphate dehydrogenase: a biomarker and potential therapeutic target for cancer. *Anticancer Agents Med Chem.* 2014; 14:280-289.

## Mitogen-activated protein kinase 13, encoded by the *MAPK13* gene

MAPK13 (p38 $\delta$  mitogen-activated protein kinase) is a serine/threonine kinase which acts as an essential component of the MAP kinase signal transduction pathway. MAPK13 plays an important role in the cascades of cellular responses evoked by extracellular stimuli such as proinflammatory cytokines. The protein is involved in the regulation of epidermal keratinocyte differentiation, apoptosis and skin tumor development.

Although MAPK13 shows signatures of negative selection that would suggest a pro-oncogenic role for the protein, experimental data are controversial as to its role in carcinogenesis: there is evidence for both a pro-oncogenic and tumor suppressor roles of MAPK13.

The observation that p38 $\delta$  promotes cell proliferation and tumor development in epidermis suggests that it has a pro-oncogenic role (Schindler *et al.*, 2009). Analyses of the gene expression profiles have shown that MAPK13 is expressed in uterine, ovary, stomach, colon, liver and kidney cancer tissues at higher levels compared with adjacent normal tissues. *MAPK13* gene knockdown has been shown to abrogate the tumor-initiating ability of cancer stem-like cells, indicating that the gene has a cancer-promoting role (Yasuda *et al.*, 2016). The protein p38 $\delta$  is highly expressed in all types of human breast cancers, whereas lack of p38 $\delta$  resulted in reduced primary tumor size and blocked the metastatic potential to the lungs (Wada *et al.*, 2017). The fact that mice with germline deletion of the p38 $\delta$  gene are significantly protected from chemical skin carcinogenesis also suggests a cancer promoting role for the protein (Kiss *et al.*, 2016). Interestingly, cell-selective targeted ablation of p38 $\delta$  in keratinocytes and in immune (myeloid) cells on skin tumor development had different effects. Conditional keratinocyte-



specific p38 $\delta$  ablation reduced malignant progression in males and females relative to their wild-type counterparts. In contrast, conditional myeloid cell-specific p38 $\delta$  deletion inhibited skin tumorigenesis in male but not female mice. These results reveal that cell-specific p38 $\delta$  targeting modifies susceptibility to skin carcinogenesis in a context-, stage-, and sex-specific manner (Kiss *et al.*, 2019).

The closely related MAPK14, MAPK12 and MAPK13 proteins are known to modulate the immune response, and since chronic inflammation is a known risk factor for tumorigenesis it seems possible that the role of MAPK13 in carcinogenesis may be associated with inflammation. Del Reino *et al.*, (2014) have analyzed the role of MAPK12 and MAPK13 in colon cancer associated to colitis and have shown that the deficiency of MAPK12 and MAPK13 significantly decreased tumor formation, in parallel with a decrease in proinflammatory cytokine and chemokine production.

In contrast with the observations arguing for a pro-oncogenic role of the protein, loss of p38 $\delta$  mitogen-activated protein kinase expression has been shown to promote oesophageal squamous cell carcinoma proliferation, migration and anchorage-independent growth, suggesting that it has a tumor suppressor role (O'Callaghan *et al.*, 2013). Similarly, inactivation of the gene in lung cancer cells has been shown to lead to upregulation of the stemness proteins, thus promoting the cancer stem cell properties of these cells (Fang *et al.*, 2017). Promoter methylation of *MAPK13* was found to be present in the majority of primary and metastatic melanomas. Restoration of MAPK13 expression in melanoma cells exhibiting epigenetic silencing of this gene reduced proliferation, indicative of tumor suppressive functions for the protein (Gao *et al.*, 2013).

In summary, although MAPK13 plays both pro-oncogenic and tumor suppressor functions in different cellular processes our observation that during tumor evolution negative selection dominates for MAPK13 suggests that the selection pressure to preserve the tumor promoting activities of MAPK13 activity overrides the pressure to eliminate its tumor suppressor activities.

Del Reino P, Alsina-Beauchamp D, Escós A, Cerezo-Guisado MI, Risco A, Aparicio N, Zur R, Fernandez-Estévez M, Collantes E, Montans J, Cuenda A. Pro-oncogenic role of alternative p38 mitogen-activated protein kinases p38 $\gamma$  and p38 $\delta$ , linking inflammation and cancer in colitis-associated colon cancer. *Cancer Res.* 2014; 74:6150-6160.

Fang Y, Wang J, Wang G, Zhou C, Wang P, Zhao S, Zhao S, Huang S, Su W, Jiang P, Chang A, Xiang R, Sun P. Inactivation of p38 MAPK contributes to stem cell-like properties of non-small cell lung cancer. *Oncotarget.* 2017; 8:26702-26717.

Gao L, Smit MA, van den Oord JJ, Goeman JJ, Verdegaal EM, van der Burg SH, Stas M, Beck S, Gruis NA, Tensen CP, Willemze R, Peeper DS, van Doorn R. Genome-wide promoter methylation analysis identifies epigenetic silencing of *MAPK13* in primary cutaneous melanoma. *Pigment Cell Melanoma Res.* 2013; 26:542-554.

Kiss A, Koppel AC, Anders J, Cataisson C, Yuspa SH, Blumenberg M, Efimova T. Keratinocyte p38 $\delta$  loss inhibits Ras-induced tumor formation, while systemic p38 $\delta$  loss enhances skin inflammation in the early phase of chemical carcinogenesis in mouse skin. *Mol Carcinog.* 2016; 55:563-574

Kiss A, Koppel AC, Murphy E, Sall M, Barlas M, Kissling G, Efimova T. Cell Type-Specific p38 $\delta$  Targeting Reveals a Context-, Stage-, and Sex-Dependent Regulation of Skin Carcinogenesis. *Int J Mol Sci.* 2019; 20(7). pii: E1532.

O'Callaghan C, Fanning LJ, Houston A, Barry OP. Loss of p38 $\delta$  mitogen-activated protein kinase expression promotes oesophageal squamous cell carcinoma proliferation, migration and anchorage-independent growth. *Int J Oncol.* 2013; 43:405-415.

Schindler EM, Hinds A, Gribben EL, Burns CJ, Yin Y, Lin MH, Owen RJ, Longmore GD, Kissling GE, Arthur JS, Efimova T. p38delta Mitogen-activated protein kinase is essential for skin tumor development in mice. *Cancer Res.* 2009; 69:4648-4655.

Wada M, Canals D, Adada M, Coant N, Salama MF, Helke KL, Arthur JS, Shroyer KR, Kitatani K, Obeid LM, Hannun YA. P38 delta MAPK promotes breast cancer progression and lung metastasis by enhancing cell proliferation and cell detachment. *Oncogene.* 2017; 36:6649-6657.

Yasuda K, Hirohashi Y, Kuroda T, Takaya A, Kubo T, Kanaseki T, Tsukahara T, Hasegawa T, Saito T, Sato N, Torigoe T MAPK13 is preferentially expressed in gynecological cancer stem cells and has a role in the tumor-initiation. *Biochem Biophys Res Commun.* 2016; 472:643-647.

### **Protein AF-9, encoded by the *MLLT3* gene**

The *MLLT3* gene (present in CGC list of cancer genes) has been selected as a gene showing very high values of rSMN, suggesting negative selection of missense and nonsense mutations (**Supplementary Table 8**).

It must be pointed out that based on the high silent/missense ratio *MLLT3* (as well as *TBP* and *DSPP*) has also been identified by others as a gene subject to negative selection (Zhou *et al.*, 2017).

Protein AF-9 is a component of a complex required to increase the catalytic rate of RNA polymerase II transcription by suppressing transient pausing by the polymerase at multiple sites along the DNA.

Several studies indicate that *MLLT3* is a proto-oncogene, its inactivation or downregulation suppresses lymphoma cell proliferation, invasion and inhibits metastasis and proliferation of prostate cancer (Zhang *et al.*, 2012; Meng *et al.*, 2017).

Despite the tumor promoting role of *MLLT3*, the high silent to missense ratio of substitution mutations does not seem to be a reflection of strong negative selection. The translated region of the *MLLT3* gene contains a long stretch of AGC repeats (encoding the polyS segment of the protein, residues 149-194). The ‘excess’ of silent mutations are clustered in the polyS tract of the protein encoded by the imperfect polymorphic AGC microsatellite region of the *MLLT3* gene, that is known to be highly unstable (Walker *et al.*, 1994).

Meng FJ, Meng FM, Wu HX, Cao XF. miR-564 inhibited metastasis and proliferation of prostate cancer by targeting MLLT3. *Eur Rev Med Pharmacol Sci.* 2017; 21:4828-4834.

Walker GJ, Walters MK, Palmer JM, Hayward NK. The *MLLT3* gene maps between D9S156 and D9S171 and contains an unstable polymorphic trinucleotide repeat. *Genomics.* 1994; 20:490-491.

Zhang T, Luo Y, Wang T, Yang JY. MicroRNA-297b-5p/3p target Mllt3/Af9 to suppress lymphoma cell proliferation, migration and invasion in vitro and tumor growth in nude mice. *Leuk Lymphoma.* 2012; 53:2033-2040.

Zhou Z, Zou Y, Liu G, Zhou J, Wu J, Zhao S, Su Z, Gu X. Mutation-profile-based methods for understanding selection forces in cancer somatic mutations: a comparative analysis. *Oncotarget.* 2017;8:58835-58846.

### **Neuro-oncological ventral antigen 1 (Nova-1), encoded by the *NOVA1* gene**

Nova-1 is an RNA-binding protein involved in the regulation of RNA splicing.

The importance of Noval for tumor growth is supported by the observation that overexpressed intratumoral NOVA1 was associated with poor survival rate and increased recurrence rate of hepatocellular carcinoma (HCC) and was an independent prognostic factor for overall survival rate and tumor recurrence. HCC cell lines over-expressing NOVA1 exhibited greater potentials in cell proliferation, invasion and migration, while knockdown of NOVA1 had the opposite effects. All these findings indicate that NOVA1 may act as a prognostic marker for poor outcome and high recurrence in HCC (Zhang *et al.*, 2014).

Similarly, NOVA1 expression was found to be up-regulated in melanoma samples and cell lines and knockdown of NOVA1 suppressed melanoma cell proliferation, migration and

invasion in both A375 and A875 cell lines. These results suggested that NOVA1 acted as an oncogene in the development of melanoma (Yu *et al.*, 2018).

Recent studies have shown that the tumor suppressor microRNA-592 suppresses the malignant phenotypes of thyroid cancer by downregulating NOVA1. Whereas overexpression of miR-592 resulted in decreased cell proliferation, migration, and invasion in thyroid cancer, ectopic NOVA1 expression effectively abolished the tumor-suppressing effects of miR-592 overexpression in thyroid cancer cells *in vitro* and *in vivo* (Luo *et al.*, 2019).

Recent studies have provided an explanation for the role of NOVA1 in carcinogenesis. Sayed *et al.*, (2019) have shown that NOVA1 as well as the polypyrimidine-tract binding protein PTBP1 acts as enhancers of full-length TERT splicing, increasing telomerase activity, promoting telomere maintenance in cancer cells, thereby favoring their replicative immortality.

Luo Y, Hao T, Zhang J, Zhang M, Sun P, Wu L. MicroRNA-592 suppresses the malignant phenotypes of thyroid cancer by regulating lncRNA NEAT1 and downregulating NOVA1. *Int J Mol Med.* 2019; 44:1172-1182.

Sayed ME, Yuan L, Robin JD, Tedone E, Batten K, Dahlsion N, Wright WE, Shay JW, Ludlow AT. NOVA1 directs PTBP1 to hTERT pre-mRNA and promotes telomerase activity in cancer cells. *Oncogene.* 2019; 38:2937-2952

Yu X, Zheng H, Chan MTV, Wu WKK. NOVA1 acts as an oncogene in melanoma via regulating FOXO3a expression. *J Cell Mol Med.* 2018; 22:2622-2630.

Zhang YA, Zhu JM, Yin J, Tang WQ, Guo YM, Shen XZ, Liu TT. High expression of neuro-oncological ventral antigen 1 correlates with poor prognosis in hepatocellular carcinoma. *PLoS One.* 2014; 9:e90955.

## Calcium/calmodulin-dependent protein kinase type 1B, encoded by the *PNCK* gene

Pregnancy up-regulated non-ubiquitous calmodulin kinase PNCK is a calcium/calmodulin-dependent protein kinase belonging to a calcium-triggered signaling cascade. It phosphorylates and activates CAMK1 that, upon calcium influx, regulates transcription activators activity, cell cycle, hormone production and cell differentiation.

Several lines of evidence suggest that PNCK promotes carcinogenesis.

PNCK has been found to be highly overexpressed in primary human breast cancers compared with benign mammary tissue (Gardner *et al.*, 2000). Increased expression of PNCK is associated with poor prognosis in clear cell renal cell carcinoma. The mRNA level of PNCK was significantly higher in tumorous tissues than in the adjacent non-tumorous tissues. Multivariate analysis indicated that PNCK expression was an independent predictor for poor survival of clear cell renal cell carcinoma patients (Wu *et al.*, 2013). Overexpression of PNCK in breast cancer cells was shown to result in increased proliferation, clonal growth and cell-cycle progression (Deb *et al.*, 2015).

Recent studies have shown that *PNCK* depletion inhibits proliferation and induces apoptosis of human nasopharyngeal carcinoma cells *in vitro* and *in vivo*, suggesting it might be a novel therapeutic target for treatment of nasopharyngeal carcinoma (Xu *et al.*, 2019).

Deb TB, Zuo AH, Barndt RJ, Sengupta S, Jankovic R, Johnson MD. Pnck overexpression in HER-2 gene-amplified breast cancer causes Trastuzumab resistance through a paradoxical PTEN-mediated process. *Breast Cancer Res Treat.* 2015; 150:347-361.

Gardner HP, Ha SI, Reynolds C, Chodosh LA. The caM kinase, Pnck, is spatially and temporally regulated during murine mammary gland development and may identify an epithelial cell subtype involved in breast cancer. *Cancer Res.* 2000; 60:5571-5577.

Wu S, Lv Z, Wang Y, Sun L, Jiang Z, Xu C, Zhao J, Sun X, Li X, Hu L, Tang A, Gui Y, Zhou F, et al. Increased expression of pregnancy up-regulated non-ubiquitous calmodulin kinase is associated with poor prognosis in clear cell renal cell carcinoma. *PLoS One.* 2013; 8:e59936.

Xu Y, Wang J, Cai S, Chen G, Xiao N, Fu Y, Chen Q, Qiu S. PNCK depletion inhibits proliferation and induces apoptosis of human nasopharyngeal carcinoma cells in vitro and in vivo. *J Cancer*. 2019;10:6925-6932..

## Runt-related transcription factor 2, encoded by the *RUNX2* gene

The protein is a member of the RUNX family of transcription factors and has a Runt DNA-binding domain. RUNX2 is a transcription factor involved in osteoblastic differentiation and skeletal morphogenesis. RUNX2 plays a cell proliferation regulatory role in cell cycle entry and exit in osteoblasts. These functions are especially important when discussing bone cancer, particularly osteosarcoma development that can be attributed to aberrant cell proliferation control.

Several studies indicate that RUNX2 plays a key role in carcinogenesis. RUNX2 overexpression was found to promote aggressiveness and metastatic spreading, whereas *RUNX2* knockdown inhibits tumor growth and metastasis suggesting an oncogenic role for the protein (Tandon *et al.*, 2014; Tandon *et al.*, 2016; Shin *et al.*, 2016; Li *et al.*, 2016; Wang *et al.*, 2016; Sancisi *et al.*, 2017; Lu *et al.*, 2018; Ji *et al.*, 2019; Herreño *et al.*, 2019).

Although strong purifying selection would not contradict the tumor promoting role of RUNX2, the high silent to missense ratio of substitution mutations is not a reflection of the strength of negative selection of missense and nonsense substitutions.

A noteworthy feature of the *RUNX2* gene is that its translated region contains a long stretch of CAG repeats (encoding the polyQ segment of the protein, residues 49-71). Interestingly, substitutions are not randomly distributed along the sequence of *RUNX2*: they are clustered in the polyQ tract of the protein encoded by the imperfect polymorphic CAG microsatellite region of the *RUNX2* gene. Since in cancer cells defective in mismatch-repair, microsatellites are known to become unstable due to increased frequency of replication error (Benachenhou, Labuda and Sinnott, 1998), it seems likely that this increases and distorts mutation pattern in the polyQ region of *RUNX2*, and this mutation hotspot may give the false impression of strong purifying selection.

Benachenhou N, Labuda D, Sinnott D. Allelic instability of TBP gene in replication error positive tumors. *Int J Cancer*. 1998; 78:525-526.

Herreño AM, Ramírez AC, Chaparro VP, Fernandez MJ, Cañas A, Morantes CF, Moreno OM, Brugés RE, Mejía JA, Bustos FJ, Montecino M, Rojas AP. Role of RUNX2 transcription factor in epithelial mesenchymal transition in non-small cell lung cancer lung cancer: Epigenetic control of the RUNX2 P1 promoter. *Tumour Biol*. 2019; 41:1010428319851014.

Ji Q, Cai G, Liu X, Zhang Y, Wang Y, Zhou L, Sui H, Li Q. MALAT1 regulates the transcriptional and translational levels of proto-oncogene RUNX2 in colorectal cancer metastasis. *Cell Death Dis*. 2019;10:378.

Li XQ, Lu JT, Tan CC, Wang QS, Feng YM. RUNX2 promotes breast cancer bone metastasis by increasing integrin  $\alpha 5$ -mediated colonization. *Cancer Lett*. 2016; 380:78-86.

Lu H, Jiang T, Ren K, Li ZL, Ren J, Wu G, Han X. RUNX2 Plays An Oncogenic Role in Esophageal Carcinoma by Activating the PI3K/AKT and ERK Signaling Pathways. *Cell Physiol Biochem*. 2018; 49:217-225.

Sancisi V, Manzotti G, Gugnoni M, Rossi T, Gandolfi G, Gobbi G, Torricelli F, Catellani F, Faria do Valle I, Remondini D, Castellani G, Ragazzi M, Piana S, Ciarrocchi A. RUNX2 expression in thyroid and breast cancer requires the cooperation of three non-redundant enhancers under the control of BRD4 and c-JUN. *Nucleic Acids Res*. 2017; 45:11249-11267.

Shin MH, He Y, Marrogi E, Piperdi S, Ren L, Khanna C, Gorlick R, Liu C, Huang J. A RUNX2-Mediated Epigenetic Regulation of the Survival of p53 Defective Cancer Cells. *PLoS Genet*. 2016; 12:e1005884.

Tandon M, Chen Z, Othman AH, Pratap J. Role of Runx2 in IGF-1R $\beta$ /Akt- and AMPK/Erk-dependent growth, survival and sensitivity towards metformin in breast cancer bone metastasis. *Oncogene*. 2016; 35:4730-4740.

Tandon M, Chen Z, Pratap J. Runx2 activates PI3K/Akt signaling via mTORC2 regulation in invasive breast cancer cells. *Breast Cancer Res.* 2014; 16:R16.

Wang X, Li L, Wu Y, Zhang R, Zhang M, Liao D, Wang G, Qin G, Xu RH, Kang T. CBX4 Suppresses Metastasis via Recruitment of HDAC3 to the Runx2 Promoter in Colorectal Carcinoma. *Cancer Res.* 2016; 76:7277-7289.

## Monocarboxylate transporter 4 (MCT 4), encoded by the *SLC16A3* gene

Monocarboxylate transporter 4 (MCT4) or Solute carrier family 16 member 3 (SLC16A3) is a member of the proton-linked monocarboxylate transporter. It catalyzes the rapid transport across the plasma membrane of many monocarboxylates such as lactate.

Due to abnormal conversion of pyruvic acid to lactic acid even under normoxia, glucose consuming tumors must rapidly efflux lactic acid to the microenvironment to maintain a robust glycolytic flux and to prevent poisoning themselves (Mathupala *et al.*, 2007). Survival and maintenance of the glycolytic phenotype of tumor cells is ensured by monocarboxylate transporter 4 (MCT4, encoded by the *SLC16A3* gene) that efficiently transports L-lactate out of the cell (Ganapathy, Thangaraju and Prasad, 2009).

As high metabolic and proliferative rates in cancer cells lead to production of large amounts of lactate, extruding transporters are essential for the survival of cancer cells. This point may be illustrated by the fact that knockdown of MCT4 increased tumor-free survival and decreased in vitro proliferation rate of tumor cells (Andersen *et al.*, 2018).

Using a functional screen Baenke *et al.*, (2015) have also demonstrated that monocarboxylate transporter 4 is an important regulator of breast cancer cell survival: MCT4 depletion reduced the ability of breast cancer cells to grow, suggesting that it might be a valuable therapeutic target.

In harmony with the essentiality of MCT4 for tumor growth, several studies indicate that expression of the hypoxia-inducible monocarboxylate transporter MCT4 is increased in tumors and its expression correlates with clinical outcome, thus it may serve as a valuable prognostic factor (Witkiewicz *et al.*, 2012; Doyen *et al.*, 2014; Baek *et al.*, 2014)

Consistent with the key importance of MCT4 for the survival of tumor cells, its selective inhibition to block lactic acid efflux appears to be a promising therapeutic strategy against highly glycolytic malignant tumors (Todenhöfer *et al.*, 2018; Choi *et al.*, 2016, 2018; Zhao *et al.*, 2019)

Andersen AP, Samsøe-Petersen J, Oerbo EK, Boedtker E, Moreira JMA, Kveiborg M, Pedersen SF. The net acid extruders NHE1, NBCn1 and MCT4 promote mammary tumor growth through distinct but overlapping mechanisms. *Int J Cancer.* 2018; 142:2529-2542.

Baek G, Tse YF, Hu Z, Cox D, Buboltz N, McCue P, Yeo CJ, White MA, DeBerardinis RJ, Knudsen ES, Witkiewicz AK. MCT4 defines a glycolytic subtype of pancreatic cancer with poor prognosis and unique metabolic dependencies. *Cell Rep.* 2014; 9:2233-2249.

Baenke F, Dubuis S, Brault C, Weigelt B, Dankworth B, Griffiths B, Jiang M, Mackay A, Saunders B, Spencer-Dene B, Ros S, Stamp G, Reis-Filho JS, et al. Functional screening identifies MCT4 as a key regulator of breast cancer cell metabolism and survival. *J Pathol.* 2015; 237:152-165.

Choi SY, Xue H, Wu R, Fazli L, Lin D, Collins CC, Gleave ME, Gout PW, Wang Y. The *MCT4* Gene: A Novel, Potential Target for Therapy of Advanced Prostate Cancer. *Clin Cancer Res.* 2016;22:2721-2733.

Choi SYC, Ettinger SL, Lin D, Xue H, Ci X, Nabavi N, Bell RH, Mo F, Gout PW, Fleshner NE, Gleave ME, Collins CC, Wang Y. Targeting MCT4 to reduce lactic acid secretion and glycolysis for treatment of neuroendocrine prostate cancer. *Cancer Med.* 2018. 7:3385-3392.

Doyen J, Trastour C, Ettore F, Peyrottes I, Toussant N, Gal J, Ilc K, Roux D, Parks SK, Ferrero JM, Pouyssegur J. Expression of the hypoxia-inducible monocarboxylate transporter MCT4 is increased in triple negative breast cancer and correlates independently with clinical outcome. *Biochem Biophys Res Commun.* 2014; 451:54-61.

Ganapathy V, Thangaraju M, Prasad PD. Nutrient transporters in cancer: relevance to Warburg hypothesis and beyond. *Pharmacol Ther.* 2009;121:29-40.

Mathupala SP, Colen CB, Parajuli P, Sloan AE. Lactate and malignant tumors: a therapeutic target at the end stage of glycolysis. *J. Bioenerg. Biomembr.* 2007; 39:73–77.

Todenhöfer T, Seiler R, Stewart C, Moskalev I, Gao J, Ladhar S, Kamjabi A, Al Nakouzi N, Hayashi T, Choi S, Wang Y, Frees S, Daugaard M et al. Selective Inhibition of the Lactate Transporter MCT4 Reduces Growth of Invasive Bladder Cancer *Mol Cancer Ther.* 2018; 17:2746-2755.

Witkiewicz AK, Whitaker-Menezes D, Dasgupta A, Philp NJ, Lin Z, Gandara R, Sneddon S, Martinez-Outschoorn UE, Sotgia F, Lisanti MP. Using the "reverse Warburg effect" to identify high-risk breast cancer patients: stromal MCT4 predicts poor clinical outcome in triple-negative breast cancers. *Cell Cycle.* 2012; 11:1108-1117.

Zhao Y, Li W, Li M, Hu Y, Zhang H, Song G, Yang L, Cai K, Luo Z. Targeted inhibition of MCT4 disrupts intracellular pH homeostasis and confers self-regulated apoptosis on hepatocellular carcinoma. *Exp Cell Res.* 2019; 31:111591.

## **Solute carrier family 2, facilitated glucose transporter member 1, encoded by the *SLC2A1* gene**

*SLC2A1* functions as a facilitative glucose transporter, which is responsible for glucose uptake.

Significantly, several nutrient transporter protein genes were found among the genes showing the strongest signs of purifying selection. The most likely explanation for the selective pressure to preserve their integrity is that tumor cells have an increased demand for nutrients and this demand is met by enhanced cellular entry of nutrients through upregulation of specific transporters (Ganapathy, Thangaraju and Prasad, 2009).

The uncontrolled cell proliferation of tumor cells involves not only deregulated control of cell proliferation but also major adjustments of energy metabolism in order to fuel cell growth and division in the hypoxic microenvironments in which they reside. Otto Warburg was the first to observe an anomalous characteristic of cancer cell energy metabolism: even in the presence of oxygen, cancer cells limit their energy metabolism largely to glycolysis, leading to a state that has been termed “aerobic glycolysis (Warburg, 1956). Cancer cells are known to compensate for the lower efficiency of ATP production through glycolysis than oxidative phosphorylation by upregulating glucose transporters, such as GLUT1, thus increasing glucose import into the cytoplasm (Jones and Thompson, 2009; DeBerardinis *et al.*, 2008; Hsu and Sabatini, 2008).

The markedly increased uptake of glucose has been documented in many human tumor types, by noninvasively visualizing glucose uptake through positron emission tomography using a radiolabeled analog of glucose as a reporter. This reliance of tumor cells on glycolysis is also supported by the hypoxia response system: under hypoxic conditions not only glucose transporters but also multiple enzymes of the glycolytic pathway are upregulated (Jones and Thompson, 2009; DeBerardinis *et al.*, 2008; Semenza, 2010a, b; Kroemer and Pouyssegur, 2008)

In our view, the central role of GLUT1 in cancer metabolism is reflected by the fact that the gene (*SLC2A1* gene of solute carrier family member 2 protein) encoding this glucose transporter is among the genes that show the strongest signatures of purifying selection (see **Supplementary Table 6**).

The key importance of GLUT1 in cancer may be illustrated by the fact that high levels of GLUT1 expression correlates with a poor overall survival and is associated with increased malignant potential, invasiveness and poor prognosis (Wang *et al.*, 2017; Deng *et al.*, 2018; de Castro *et al.*, 2018).

The strict requirement for GLUT1 in the early stages of mammary tumorigenesis highlights the potential for glucose restriction as a breast cancer preventive strategy (Wellberg *et al.*, 2016). The tumor essentiality of GLUT1 may also be illustrated by the fact that knockdown of GLUT1 inhibits cell glycolysis and proliferation and inhibits the growth of tumors (Xiao *et al.*, 2018). In view of its essentiality for tumor growth, GLUT1 is a promising target for cancer therapy (Shibuya *et al.*, 2015; Noguchi *et al.*, 2016; Chen *et al.*, 2017).

Recent studies suggest that the YAP1-TEAD1-GLUT1 axis plays a major role in reprogramming of cancer energy metabolism by modulating glycolysis (Lin and Xu, 2017). These authors have shown that YAP1 and TEAD1 are involved in transcriptional control of the glucose transporter GLUT1: whereas knockdown of YAP1 inhibited glucose consumption, and lactate production of breast cancer cells, overexpression of GLUT1 restored glucose consumption and lactate production.

Chen Q, Meng YQ, Xu XF, Gu J. Blockade of GLUT1 by WZB117 resensitizes breast cancer cells to adriamycin. *Anticancer Drugs*. 2017; 28:880-887.

DeBerardinis RJ, Lum JJ, Hatzivassiliou G, Thompson C.B. The biology of cancer: Metabolic reprogramming fuels cell growth and proliferation. *Cell Metab*. 2008; 7:11-20

de Castro TB, Mota AL, Bordin-Junior NA, Neto DS, Zuccari DAPC. Immunohistochemical Expression of Melatonin Receptor MT1 and Glucose Transporter GLUT1 in Human Breast Cancer. *Anticancer Agents Med Chem*. 2018; 18:2110-2116.

Deng Y, Zou J, Deng T, Liu J. Clinicopathological and prognostic significance of GLUT1 in breast cancer: A meta-analysis. *Medicine (Baltimore)*. 2018; 97:e12961.

Ganapathy V, Thangaraju M, Prasad PD. Nutrient transporters in cancer: relevance to Warburg hypothesis and beyond. *Pharmacol Ther*. 2009; 121:29-40.

Hsu PP, Sabatini DM. Cancer cell metabolism: Warburg and beyond. *Cell*. 2008; 134:703-707

Jones RG, Thompson C.B. Tumor suppressors and cell metabolism: a recipe for cancer growth. *Genes Dev*. 2009; 23:537-548

Kroemer G, Pouyssegur J. Tumor cell metabolism: Cancer's Achilles' heel. *Cancer Cell*. 2008; 13:472-482

Lin C, Xu X. YAP1-TEAD1-Glut1 axis dictates the oncogenic phenotypes of breast cancer cells by modulating glycolysis. *Biomed Pharmacother*. 2017; 95:789-794.

Noguchi C, Kamitori K, Hossain A, Hoshikawa H, Katagi A, Dong Y, Sui L, Tokuda M, Yamaguchi F. D-Allose Inhibits Cancer Cell Growth by Reducing GLUT1 Expression. *Tohoku J Exp Med*. 2016; 238:131-141.

Semenza GL. Defining the role of hypoxia-inducible factor 1 in cancer biology and therapeutics. *Oncogene*. 2010; 29:625-634

Semenza GL. HIF-1: upstream and downstream of cancer metabolism. *Curr. Opin. Genet. Dev*. 2010; 20:51-56

Shibuya K, Okada M, Suzuki S, Seino M, Seino S, Takeda H, Kitanaka C. Targeting the facilitative glucose transporter GLUT1 inhibits the self-renewal and tumor-initiating capacity of cancer stem cells. *Oncotarget*. 2015; 6:651-661.

Wang J, Ye C, Chen C, Xiong H, Xie B, Zhou J, Chen Y, Zheng S, Wang L. Glucose transporter GLUT1 expression and clinical outcome in solid tumors: a systematic review and meta-analysis. *Oncotarget*. 2017; 8:16875-16886.

Warburg O. On the origin of cancer cells. *Science*. 1956;123:309-314.

Wellberg EA, Johnson S, Finlay-Schultz J, Lewis AS, Terrell KL, Sartorius CA, Abel ED, Muller WJ, Anderson SM. The glucose transporter GLUT1 is required for ErbB2-induced mammary tumorigenesis. *Breast Cancer Res*. 2016; 18:131.

Xiao H, Wang J, Yan W, Cui Y, Chen Z, Gao X, Wen X, Chen J. GLUT1 regulates cell glycolysis and proliferation in prostate cancer. *Prostate*. 2018; 78:86-94.

## **Solute carrier family 2, facilitated glucose transporter member 8, encoded by the *SLC2A8* gene**

The SLC2A8/GLUT8 is a member of the glucose transporter superfamily that mediates the transport of glucose and fructose.

In harmony with the strong signatures of negative selection there is evidence that GLUT8 plays an important role in carcinogenesis: it is overexpressed in and is required for proliferation and viability of tumors (Goldman *et al.*, 2006; McBrayer *et al.*, 2012).

Goldman NA, Katz EB, Glenn AS, Weldon RH, Jones JG, Lynch U, Fezzari MJ, Runowicz CD, Goldberg GL, Charron MJ. GLUT1 and GLUT8 in endometrium and endometrial adenocarcinoma. *Mod Pathol.* 2006; 19:1429-1436.

McBrayer SK, Cheng JC, Singhal S, Krett NL, Rosen ST, Shanmugam M. Multiple myeloma exhibits novel dependence on GLUT4, GLUT8, and GLUT11: implications for glucose transporter-directed therapy *Blood.* 2012; 119:4686-4697.

## **TATA-box-binding protein, encoded by the *TBP* gene**

The *TBP* gene has been selected as a gene showing very high values of rSMN, suggesting negative selection of missense and nonsense mutations (**Supplementary Table 8**). It must be pointed out that based on the high silent/missense ratio *TBP* (as well as *DSPP* and *MLLT3*) has also been identified by others as a gene subject to negative selection (Zhou *et al.*, 2017).

The protein is a general transcription factor that functions at the core of the DNA-binding multiprotein factor TFIID. Binding of TFIID to the TATA box is the initial transcriptional step of the pre-initiation complex, playing a role in the activation of eukaryotic genes transcribed by RNA polymerase II. In view of such a basic cell essential function, it seemed justified to assume that it is the indispensability of the gene for the survival of tumor cells (just like any other cell) that subjects it to strong purifying selection and the high silent/missense ratio is a reflection of this negative selection. TBP has been thought to be an invariant housekeeping protein, however, several studies have shown that TBP expression is significantly increased in both colon adenocarcinomas as well as adenomas relative to normal tissue, supporting the idea that increases in TBP expression actually drive tumorigenesis (Johnson *et al.*, 2003a, b; Johnson *et al.*, 2017).

Inspection of the spectrum of somatic mutations of the *TBP* gene suggests that the high silent/missense ratio is unlikely to be simply due to negative selection that may hold for both oncogenes and tumor essential genes. A noteworthy feature of the *TBP* gene is that its translated region contains a long stretch of CAG repeats (encoding the polyQ segment of the protein, residues 57-95). The distribution of silent mutations is markedly non-random: they are clustered in the polyQ tract of the protein encoded by the imperfect polymorphic CAG microsatellite region of the *TBP* gene. Since in cancer cells defective in mismatch-repair, microsatellites are known to become unstable due to increased frequency of replication error (Benachenhou, Labuda and Sinnott, 1998), it seems likely that this is why the rate of mutation in the polyQ region of TBP is much higher than in other regions of the gene. The high silent to missense rate is thus not due to negative selection acting on missense and nonsense substitutions. Rather, it may reflect the fact that the imperfect polymorphic CAG microsatellite region of the *TBP* gene serves as a mutation hotspot, with a biased substitution pattern.

Benachenhou N, Labuda D, Sinnott D. Allelic instability of TBP gene in replication error positive tumors. *Int J Cancer.* 1998; 78:525-526.



Johnson SA, Dubeau L, Kawalek M, Dervan A, Schönthal AH, Dang CV, Johnson DL. Increased expression of TATA-binding protein, the central transcription factor, can contribute to oncogenesis. *Mol Cell Biol.* 2003; 23:3043-3051.

Johnson SA, Dubeau L, White RJ, Johnson DL. The TATA-binding protein as a regulator of cellular transformation. *Cell Cycle.* 2003; 2:442-444.

Johnson SAS, Lin JJ, Walkey CJ, Leathers MP, Coarfa C, Johnson DL. Elevated TATA-binding protein expression drives vascular endothelial growth factor expression in colon cancer. *Oncotarget.* 2017; 8:48832-48845.

Zhou Z, Zou Y, Liu G, Zhou J, Wu J, Zhao S, Su Z, Gu X. Mutation-profile-based methods for understanding selection forces in cancer somatic mutations: a comparative analysis. *Oncotarget.* 2017;8:58835-58846

## **Thromboxane A2 receptor, encoded by the *TBXA2R* gene**

TBXA2R is a plasma membrane protein that serves as a receptor for thromboxane A2, a potent stimulator of platelet aggregation. The activity of this receptor is mediated by a G-protein that activates a phosphatidylinositol-calcium second messenger system.

Studies on the expression of thromboxane A2 receptor, TBXA2R in a cohort of human breast cancer patients revealed that breast tumor tissues expressed higher levels of TBXA2R compared with normal mammary tissues and that TBXA2R expression was most significantly increased in grade 3 tumors. Kaplan-Meier survival analysis has also shown that patients with high levels of TBXA2R had significantly shorter disease-free survival. The observation that TBXA2R is highly expressed in aggressive tumors and linked with poor prognosis indicates that TBXA2R has a significant prognostic value in clinical breast cancer (Watkins *et al.*, 2005).

The role of TBXA2R in carcinogenesis is also supported by the observation that Thromboxane A2 was shown to enhance tumor metastasis and that the tumor promoting activity required intact TBXA2 receptor (Matsui *et al.*, 2012). These studies revealed that TBXA2-TBXA2R signaling plays a critical role in tumor colonization through P-selectin-mediated interactions between platelets-tumor cells and tumor cells-endothelial cells, suggesting that blockade of this signaling might be useful in the treatment of tumor metastasis.

Although the involvement of TBXA2-TBXA2R signaling in cancer invasion and metastasis appears to be clearly established, there may be other mechanisms by which TBXA2 promotes these processes. Li *et al.* (2013) have shown that a TBXA2 mimetic induced the expression of the monocyte chemoattractant chemokine ligand protein CCL2, suggesting that TBXA2 may also stimulate invasion of cancer cells through CCL2-CCR2 mediated macrophage recruitment.

Recent studies on Triple Negative Breast Cancer (TNBC) cell lines revealed that TBXA2R expression was higher in these cell lines and that *TBXA2R* knockdowns consistently showed dramatic cell killing in TNBC cells (Orr *et al.*, 2016). It has also been shown that TBXA2R enhanced TNBC cell migration, invasion, indicating that the gene is required for the survival and migratory behavior of a subset of TNBCs.

A phenome-wide association study has shown that a single nucleotide polymorphism in the gene *TBXA2R* is associated with increased metastasis in multiple primary cancers, suggesting the requirements for thromboxane A2 (TXA2) and TBXA2R in the basic mechanism of metastasis, and the clinical applicability of TBXA2R antagonists as adjuvant therapy in multiple cancers (Pulley *et al.*, 2018).

Li X, Tai HH. Activation of thromboxane A2 receptor (TP) increases the expression of monocyte chemoattractant protein -1 (MCP-1)/chemokine (C-C motif) ligand 2 (CCL2) and recruits macrophages to promote invasion of lung cancer cells. *PLoS One.* 2013; 8:e54073.

Matsui Y, Amano H, Ito Y, Eshima K, Suzuki T, Ogawa F, Iyoda A, Satoh Y, Kato S, Nakamura M, Kitasato H, Narumiya S, Majima M. Thromboxane A<sub>2</sub> receptor signaling facilitates tumor colonization through P-selectin-mediated interaction of tumor cells with platelets and endothelial cells. *Cancer Sci.* 2012; 103:700-707.

Orr K, Buckley NE, Haddock P, James C, Parent JL, McQuaid S, Mullan PB. Thromboxane A2 receptor (TBXA2R) is a potent survival factor for triple negative breast cancers (TNBCs). *Oncotarget.* 2016; 7:55458-55472.

Pulley JM, Jerome RN, Ogletree ML, Bernard GR, Lavieri RR, Zaleski NM, Hong CC, Shirey-Rice JK, Arteaga CL, Mayer IA, Holroyd KJ, Cook RS. Motivation for Launching a Cancer Metastasis Inhibition (CMI) Program. *Target Oncol.* 2018; 13:61-68.

Watkins G, Douglas-Jones A, Mansel RE, Jiang WG. Expression of thromboxane synthase, TBXAS1 and the thromboxane A2 receptor, TBXA2R, in human breast cancer. *Int Semin Surg Oncol.* 2005; 2:23.

## Tumor protein p73, encoded by the *TP73* gene

The protein is known to participate in the apoptotic response to DNA damage: isoforms containing the N-terminal transactivation domain are pro-apoptotic, isoforms lacking the transactivation domain are anti-apoptotic.

Although p73 shows substantial homology with p53, despite the established role of p53 as a tumor suppressor, p73 does not have a similar tumor suppressor role in malignancy: unlike p53<sup>-/-</sup> mice, p73 knockout mice do not develop tumors. In fact, N-terminally truncated p73 isoforms, lacking the transactivation domain were shown to possess oncogenic potential (Stiewe and Pützer, 2002; Stiewe *et al.*, 2002).

Numerous studies have shown that  $\Delta$ Np73, the oncogenic isoform of p73 lacking the transactivation domain, is frequently up-regulated in many carcinomas and is indicative of poor prognosis (Zaika *et al.*, 2002; Petrenko, Zaika and Moll, 2003; Domínguez *et al.*, 2006; Hassan *et al.*, 2014; Hassan, Dave and Singh, 2014; Lucena-Araujo *et al.*, 2015).

Our observation that p73, an oncogenic protein, shows only strong signatures of purifying selection provides one of the clearest examples illustrating the point that in the case of oncogenes purifying selection is not necessarily associated with positive selection for driver mutations. It must be pointed out here that it has been noted earlier by others that, despite its clear role in carcinogenesis, the *TP73* gene is almost never mutated (Bisso, Collavin and Del Sal, 2011; Maas *et al.*, 2013). One may argue that in this case the molecular change that drives carcinogenesis is the change of splicing that favors the formation of the oncogenic isoform of p73.

Bisso A, Collavin L, Del Sal G. p73 as a pharmaceutical target for cancer therapy. *Curr Pharm Des.* 2011; 17:578-590.

Domínguez G, García JM, Peña C, Silva J, García V, Martínez L, Maximiano C, Gómez ME, Rivera JA, García-Andrade C, Bonilla F. DeltaTAp73 upregulation correlates with poor prognosis in human tumors: putative in vivo network involving p73 isoforms, p53, and E2F-1. *J Clin Oncol.* 2006; 24:805-815.

Hassan HM, Dave BJ, Singh RK1. TP73, an under-appreciated player in non-Hodgkin lymphoma pathogenesis and management. *Curr Mol Med.* 2014 May;14(4):432-9.

Hassan HM, Vamey ML, Jain S, Weisenburger DD, Singh RK, Dave BJ. Disruption of chromosomal locus 1p36 differentially modulates TAp73 and  $\Delta$ Np73 expression in follicular lymphoma. *Leuk Lymphoma.* 2014; 55:2924-2931.

Lucena-Araujo AR, Kim HT, Thomé C, Jacomo RH, Melo RA, Bittencourt R, Pasquini R, Pagnano K, Glória AB, Chauffaille Mde L, Athayde M, Chiattonne CS, Mito I, et al. High  $\Delta$ Np73/TAp73 ratio is associated with poor prognosis in acute promyelocytic leukemia. *Blood.* 2015; 126:2302-2306.

Maas AM, Bretz AC, Mack E, Stiewe T. Targeting p73 in cancer. *Cancer Lett.* 2013; 332:229-236.

Petrenko O, Zaika A, Moll UM.  $\Delta$ Np73 facilitates cell immortalization and cooperates with oncogenic Ras in cellular transformation in vivo. *Mol Cell Biol.* 2003; 23:5540-5555.

Stiewe T, Pützer BM. Role of p73 in malignancy: tumor suppressor or oncogene? *Cell Death Differ.* 2002; 9:237-245.

Stiewe T, Zimmermann S, Frilling A, Esche H, Pützer BM. Transactivation-deficient DeltaTA-p73 acts as an oncogene. *Cancer Res.* 2002; 62:3598-3602.

Zaika AI, Slade N, Erster SH, Sansome C, Joseph TW, Pearl M, Chalas E, Moll UM. DeltaNp73, a dominant-negative inhibitor of wild-type p53 and TAp73, is up-regulated in human tumors. *J Exp Med.* 2002; 196:765-780.

## **Tribbles homolog 2, encoded by the *TRIB2* gene**

TRIB2 is a pseudokinase member of the pseudoenzyme class of signaling/scaffold proteins. It interacts with MAPK kinases and regulates activation of MAP kinases.

TRIB2 has been shown to be important in the maintenance of the oncogenic properties of melanoma cells, as its silencing reduces cell proliferation, colony formation. Tumor growth was also substantially reduced upon RNAi-mediated TRIB2 knockdown in an *in vivo* melanoma xenograft model, suggesting that TRIB2 provides the melanoma cells with growth and survival advantages (Zanella *et al.*, 2010).

TRIB2 expression is elevated in primary human lung tumors and in non-small cell lung cancer cells, resulting from gene amplification. *TRIB2* knockdown was found to inhibit cell proliferation and *in vivo* tumor growth, indicating that TRIB2 is a potential driver of lung tumorigenesis (Grandinetti *et al.*, 2011).

High TRIB2 expression is observed in T cell acute lymphoblastic leukaemias (Hannon *et al.*, 2012). TRIB2 has been shown to be critical for both solid and non-solid malignancies and is functionally important for liver cancer cell survival and transformation. TRIB2 was found to be up-regulated in liver cancer cells compared with other cells (Wang *et al.*, 2013a, b).

TRIB2 is emerging as a pivotal target of transcription factors in acute leukemias as evidenced by the fact that *TRIB2* knockdown resulted in a block in acute myeloid leukemia cell proliferation (Rishi *et al.*, 2014).

In the case of lung adenocarcinoma, patients with higher TRIB2 levels had poorer survival (Zhang *et al.*, 2016). The tumor promoting role of this protein is supported by the observation that TRIB2 expression is significantly increased in tumor tissues from patients with extremely poor clinical outcome (Hill *et al.*, 2017; Wang *et al.*, 2019).

TRIB2 has been shown to be important for the survival of leukemia cells during MLL-TET1-related leukemogenesis and for maintaining differentiation blockade of leukemic cells: *TRIB2* knockdown relieved the inhibition of myeloid cell differentiation induced by the MLL-TET1 fusion protein (Kim *et al.*, 2018).

TRIB2 expression has been shown to be elevated in colorectal cancer tissues compared to normal adjacent tissues and high TRIB2 expression indicated poor prognosis of colorectal cancer patients (Hou *et al.*, 2018). Depletion of TRIB2 inhibited cancer cell proliferation, induced cell cycle arrest and promoted cellular senescence, whereas overexpression of TRIB2 accelerated cell growth, cell cycle progression and blocked cellular senescence.

Grandinetti KB, Stevens TA, Ha S, Salamone RJ, Walker JR, Zhang J, Agarwalla S, Tenen DG, Peters EC, Reddy VA. Overexpression of TRIB2 in human lung cancers contributes to tumorigenesis through downregulation of C/EBP $\alpha$ . *Oncogene.* 2011; 30:3328-3335.

Hannon MM, Lohan F, Erbilgin Y, Sayitoglu M, O'Hagan K, Mills K, Ozbek U, Keeshan K. Elevated TRIB2 with NOTCH1 activation in paediatric/adult T-ALL. *Br J Haematol.* 2012; 158:626-634.

Hill R, Madureira PA, Ferreira B, Baptista I, Machado S, Colaço L, Dos Santos M, Liu N, Dopazo A, Ugurel S, Adrienn A, Kiss-Toth E, Isbilen M, et al. TRIB2 confers resistance to anti-cancer therapy by activating the serine/threonine protein kinase AKT. *Nature Communications*. 2017; 8:14687.

Hou Z, Guo K, Sun X, Hu F, Chen Q, Luo X, Wang G, Hu J, Sun L. TRIB2 functions as novel oncogene in colorectal cancer by blocking cellular senescence through AP4/p21 signaling. *Mol Cancer*. 2018;17:172.

Kim HS, Oh SH, Kim JH, Sohn WJ, Kim JY, Kim DH, Choi SU, Park KM, Ryoo ZY, Park TS, Lee SJ. TRIB2 regulates the differentiation of MLL-TET1 transduced myeloid progenitor cells. *Mol Med (Berl)*. 2018; 96:1267-1277

Rishi L, Hannon M, Salomè M, Hasemann M, Frank AK, Campos J, Timoney J, O'Connor C, Cahill MR, Porse B, Keeshan K. Regulation of Trib2 by an E2F1-C/EBP $\alpha$  feedback loop in AML cell proliferation. *Blood*. 2014; 123:2389-2400.

Wang J, Park JS, Wei Y, Rajurkar M, Cotton JL, Fan Q, Lewis BC, Ji H, Mao J. TRIB2 acts downstream of Wnt/TCF in liver cancer cells to regulate YAP and C/EBP $\alpha$  function. *Mol Cell*. 2013; 51:211-225.

Wang J, Zhang Y, Weng W, Qiao Y, Ma L, Xiao W, Yu Y, Pan Q, Sun F. Impaired phosphorylation and ubiquitination by p70 S6 kinase (p70S6K) and Smad ubiquitination regulatory factor 1 (Smurf1) promote tribbles homolog 2 (TRIB2) stability and carcinogenic property in liver cancer. *J Biol Chem*. 2013; 288:33667-33681.

Wang J, Zuo J, Wahafu A, Wang MD, Li RC, Xie WF. Combined elevation of TRIB2 and MAP3K1 indicates poor prognosis and chemoresistance to temozolomide in glioblastoma. *CNS Neurosci Ther*. 2019 Jul 18.

Zanella F, Renner O, García B, Callejas S, Dopazo A, Peregrina S, Camero A, Link W. Human TRIB2 is a repressor of FOXO that contributes to the malignant phenotype of melanoma cells. *Oncogene*. 2010; 29:2973-2982.

Zhang YX, Yan YF, Liu YM, Li YJ, Zhang HH, Pang M, Hu JX, Zhao W, Xie N, Zhou L, Wang PY, Xie SY. Smad3-related miRNAs regulated oncogenic TRIB2 promoter activity to effectively suppress lung adenocarcinoma growth. *Cell Death Dis*. 2016; 7:e2528.

## Twist-related protein 1, encoded by the *TWIST1* gene

The *TWIST1* gene is characterized by very high value of rSMN (**Supplementary Table 3**), indicating strong signature of purifying selection, suggesting that it plays an important role in promoting tumorigenesis.

Twist-related protein 1, TWIST1 is a transcription factor and master regulator of the epithelial-to-mesenchymal transition that significantly contributes to tumor growth and metastasis. TWIST1 is overexpressed in a variety of tumors and numerous studies have shown that targeting TWIST1 significantly inhibits tumor growth (Wushou *et al.*, 2014; Zhu *et al.*, 2016; Xu *et al.*, 2017a, b; Mikheev *et al.*, 2018).

Recent studies have revealed that AURKA and TWIST1 are linked in as much as ablation of either AURKA or TWIST1 completely inhibits epithelial-to-mesenchymal transition (Wang *et al.*, 2017).

Mikheev AM, Mikheeva SA, Severs LJ, Funk CC, Huang L, McFaline-Figueroa JL, Schwensen J, Trapnell C, Price ND, Wong S, Rostomily RC. Targeting TWIST1 through loss of function inhibits tumorigenicity of human glioblastoma. *Mol Oncol*. 2018; 12:1188-1202.

Wang J, Nikhil K, Viccaro K, Chang L, Jacobsen M, Sandusky G, Shah K. The Aurora-A-Twist1 axis promotes highly aggressive phenotypes in pancreatic carcinoma. *J Cell Sci*. 2017; 130:1078-1093.

Wushou A, Hou J, Zhao YJ, Shao ZM. Twist-1 up-regulation in carcinoma correlates to poor survival. *Int J Mol Sci*. 2014; 15:21621-21630.

Xu Y, Lee DK, Feng Z, Xu Y, Bu W, Li Y, Liao L, Xu J. Breast tumor cell-specific knockout of Twist1 inhibits cancer cell plasticity, dissemination, and lung metastasis in mice. *Proc Natl Acad Sci U S A*. 2017; 114:11494-11499

Xu Y, Qin L, Sun T, Wu H, He T, Yang Z, Mo Q, Liao L, Xu J. Twist1 promotes breast cancer invasion and metastasis by silencing Foxa1 expression. *Oncogene*. 2017; 36:1157-1166.

Zhu QQ, Ma C, Wang Q, Song Y, Lv T. The role of TWIST1 in epithelial-mesenchymal transition and cancers. *Tumour Biol*. 2016; 37:185-197.
